# Supplementary material for: Identification of four hub genes associated with adrenocortical carcinoma progression by WGCNA
Source: PeerJ. 2019 Mar 14;7:e6555. doi: 10.7717/peerj.6555 (PMC6421058; doi:10.7717/peerj.6555)
Supplement: Supplemental Information 4 [file peerj-07-6555-s004.xlsx]

## Sheet: Sheet1
gene_id	moduleColors
ENSG00000094963.13	black
ENSG00000280143.1	black
ENSG00000008517.16	blue
ENSG00000070081.15	blue
ENSG00000134709.10	brown
ENSG00000120662.15	turquoise
ENSG00000164283.12	blue
ENSG00000013392.7	turquoise
ENSG00000260549.1	green
ENSG00000113971.18	brown
ENSG00000127564.16	blue
ENSG00000277998.1	pink
ENSG00000034239.10	turquoise
ENSG00000270757.1	turquoise
ENSG00000109805.9	blue
ENSG00000127329.14	red
ENSG00000129451.11	grey
ENSG00000133624.13	brown
ENSG00000117394.19	blue
ENSG00000103175.10	black
ENSG00000272734.1	grey
ENSG00000152049.6	turquoise
ENSG00000230707.1	grey
ENSG00000123364.4	blue
ENSG00000175309.14	brown
ENSG00000153044.9	blue
ENSG00000079819.16	turquoise
ENSG00000257151.1	turquoise
ENSG00000255248.6	black
ENSG00000132300.18	turquoise
ENSG00000133226.16	turquoise
ENSG00000162076.12	blue
ENSG00000197444.9	brown
ENSG00000112200.16	turquoise
ENSG00000165716.9	yellow
ENSG00000226232.8	brown
ENSG00000255284.1	turquoise
ENSG00000082515.16	blue
ENSG00000270015.1	turquoise
ENSG00000175643.8	blue
ENSG00000269968.1	pink
ENSG00000251429.1	brown
ENSG00000120457.11	yellow
ENSG00000231234.2	turquoise
ENSG00000214176.9	brown
ENSG00000092529.22	brown
ENSG00000085999.11	blue
ENSG00000106809.10	black
ENSG00000232573.1	pink
ENSG00000164104.11	blue
ENSG00000237595.3	yellow
ENSG00000165029.15	turquoise
ENSG00000153898.12	turquoise
ENSG00000005421.8	turquoise
ENSG00000281490.1	brown
ENSG00000095794.19	turquoise
ENSG00000107551.20	green
ENSG00000103043.14	pink
ENSG00000165730.14	turquoise
ENSG00000175745.11	red
ENSG00000074755.14	turquoise
ENSG00000198937.8	blue
ENSG00000021762.19	turquoise
ENSG00000160867.14	yellow
ENSG00000121060.14	turquoise
ENSG00000172197.10	green
ENSG00000214485.6	turquoise
ENSG00000121064.12	green
ENSG00000270123.3	grey
ENSG00000157150.4	turquoise
ENSG00000150593.15	turquoise
ENSG00000224114.1	blue
ENSG00000232187.1	turquoise
ENSG00000173545.4	turquoise
ENSG00000162601.9	turquoise
ENSG00000121957.12	blue
ENSG00000169246.16	brown
ENSG00000155926.13	green
ENSG00000242349.5	blue
ENSG00000178297.12	yellow
ENSG00000274808.4	brown
ENSG00000167371.16	brown
ENSG00000110324.9	green
ENSG00000147378.11	yellow
ENSG00000143437.20	turquoise
ENSG00000240342.3	turquoise
ENSG00000271737.1	blue
ENSG00000163536.12	green
ENSG00000183578.5	green
ENSG00000162692.10	blue
ENSG00000235961.5	blue
ENSG00000186480.12	yellow
ENSG00000143382.13	yellow
ENSG00000154556.17	yellow
ENSG00000118849.9	turquoise
ENSG00000129596.4	yellow
ENSG00000141505.11	yellow
ENSG00000026297.15	green
ENSG00000197976.10	brown
ENSG00000137507.11	black
ENSG00000137496.17	green
ENSG00000266086.1	pink
ENSG00000074657.13	red
ENSG00000140937.13	blue
ENSG00000237883.1	grey
ENSG00000151498.11	turquoise
ENSG00000234072.1	blue
ENSG00000117650.12	blue
ENSG00000164932.12	blue
ENSG00000228643.1	yellow
ENSG00000128482.15	turquoise
ENSG00000132341.11	blue
ENSG00000151572.16	yellow
ENSG00000096093.14	green
ENSG00000109920.12	turquoise
ENSG00000168078.9	blue
ENSG00000131781.12	turquoise
ENSG00000124549.14	turquoise
ENSG00000276354.1	grey
ENSG00000230185.4	grey
ENSG00000169684.13	blue
ENSG00000124785.8	blue
ENSG00000187134.12	green
ENSG00000213225.7	turquoise
ENSG00000163531.15	yellow
ENSG00000274051.1	grey
ENSG00000060566.13	blue
ENSG00000130234.10	brown
ENSG00000224287.2	blue
ENSG00000114812.12	green
ENSG00000101265.15	green
ENSG00000134698.10	turquoise
ENSG00000187474.4	green
ENSG00000139354.10	blue
ENSG00000167434.9	turquoise
ENSG00000182983.14	red
ENSG00000162733.16	turquoise
ENSG00000106868.16	turquoise
ENSG00000143515.16	blue
ENSG00000230724.9	turquoise
ENSG00000256210.3	turquoise
ENSG00000269981.1	grey
ENSG00000124731.12	green
ENSG00000133794.17	turquoise
ENSG00000167978.16	blue
ENSG00000273000.5	blue
ENSG00000271787.1	pink
ENSG00000106397.11	blue
ENSG00000040933.15	turquoise
ENSG00000263647.1	brown
ENSG00000148057.15	turquoise
ENSG00000166387.11	green
ENSG00000240291.1	green
ENSG00000119139.16	turquoise
ENSG00000113389.15	turquoise
ENSG00000126787.12	blue
ENSG00000146950.12	brown
ENSG00000122417.15	blue
ENSG00000177380.13	yellow
ENSG00000109861.15	green
ENSG00000167302.9	turquoise
ENSG00000241404.6	brown
ENSG00000070366.13	turquoise
ENSG00000134684.10	turquoise
ENSG00000161800.12	blue
ENSG00000090971.4	blue
ENSG00000066739.11	turquoise
ENSG00000213221.4	blue
ENSG00000213058.3	grey
ENSG00000187398.11	turquoise
ENSG00000167157.10	yellow
ENSG00000112742.9	blue
ENSG00000262879.5	turquoise
ENSG00000225746.8	grey
ENSG00000102996.4	blue
ENSG00000114737.15	green
ENSG00000253953.2	brown
ENSG00000152104.11	turquoise
ENSG00000215447.7	turquoise
ENSG00000100918.12	blue
ENSG00000271895.2	blue
ENSG00000122756.14	yellow
ENSG00000206341.7	turquoise
ENSG00000106333.12	blue
ENSG00000255031.5	turquoise
ENSG00000202538.1	grey
ENSG00000126218.11	grey
ENSG00000005471.15	yellow
ENSG00000231064.5	turquoise
ENSG00000165140.9	turquoise
ENSG00000235065.1	blue
ENSG00000157873.17	green
ENSG00000151882.11	turquoise
ENSG00000188234.13	turquoise
ENSG00000277586.1	blue
ENSG00000257764.2	pink
ENSG00000071967.11	turquoise
ENSG00000139597.16	turquoise
ENSG00000151364.15	turquoise
ENSG00000069011.15	blue
ENSG00000164687.10	blue
ENSG00000178038.16	turquoise
ENSG00000204084.12	turquoise
ENSG00000153885.14	red
ENSG00000196990.8	black
ENSG00000185189.15	brown
ENSG00000196436.8	grey
ENSG00000163879.10	blue
ENSG00000275325.4	turquoise
ENSG00000254860.5	turquoise
ENSG00000168785.7	blue
ENSG00000204271.10	brown
ENSG00000198429.9	green
ENSG00000241975.1	turquoise
ENSG00000169116.11	turquoise
ENSG00000113119.12	turquoise
ENSG00000245017.2	yellow
ENSG00000116580.18	turquoise
ENSG00000198074.9	green
ENSG00000155893.11	turquoise
ENSG00000265690.7	brown
ENSG00000183092.15	turquoise
ENSG00000273559.4	turquoise
ENSG00000088387.17	turquoise
ENSG00000258659.6	turquoise
ENSG00000173442.11	blue
ENSG00000114698.14	turquoise
ENSG00000182568.16	turquoise
ENSG00000152580.8	turquoise
ENSG00000013523.9	turquoise
ENSG00000119778.14	turquoise
ENSG00000168255.18	turquoise
ENSG00000157617.16	yellow
ENSG00000067048.16	grey
ENSG00000265688.1	blue
ENSG00000108958.4	turquoise
ENSG00000214708.4	blue
ENSG00000180229.12	turquoise
ENSG00000147573.16	brown
ENSG00000140092.14	black
ENSG00000077616.10	grey
ENSG00000151062.14	green
ENSG00000101447.13	blue
ENSG00000164761.8	red
ENSG00000250588.6	green
ENSG00000149292.16	turquoise
ENSG00000139725.7	blue
ENSG00000149231.11	turquoise
ENSG00000104979.8	blue
ENSG00000162444.11	red
ENSG00000145592.13	blue
ENSG00000061273.17	turquoise
ENSG00000180176.14	turquoise
ENSG00000223959.8	brown
ENSG00000116574.5	yellow
ENSG00000164944.11	blue
ENSG00000189350.12	grey
ENSG00000279322.1	pink
ENSG00000115109.13	turquoise
ENSG00000241741.1	blue
ENSG00000268203.1	green
ENSG00000162645.12	yellow
ENSG00000131747.14	blue
ENSG00000160404.17	blue
ENSG00000278195.1	grey
ENSG00000233429.9	blue
ENSG00000232346.1	turquoise
ENSG00000277209.1	pink
ENSG00000223802.7	blue
ENSG00000154839.9	blue
ENSG00000175535.6	grey
ENSG00000153291.15	brown
ENSG00000241020.1	turquoise
ENSG00000215030.5	blue
ENSG00000241288.7	turquoise
ENSG00000121152.9	blue
ENSG00000172974.11	turquoise
ENSG00000196262.13	blue
ENSG00000274615.1	pink
ENSG00000263620.1	blue
ENSG00000176049.15	yellow
ENSG00000101004.14	turquoise
ENSG00000169291.9	red
ENSG00000182636.5	turquoise
ENSG00000134056.11	turquoise
ENSG00000116711.9	green
ENSG00000085514.15	green
ENSG00000101751.10	turquoise
ENSG00000167565.12	blue
ENSG00000127184.10	turquoise
ENSG00000004139.13	turquoise
ENSG00000269910.1	turquoise
ENSG00000243156.7	turquoise
ENSG00000117472.9	green
ENSG00000198003.11	yellow
ENSG00000267815.1	blue
ENSG00000163596.16	brown
ENSG00000167613.15	green
ENSG00000258484.3	blue
ENSG00000257386.1	pink
ENSG00000159167.11	blue
ENSG00000230953.2	pink
ENSG00000236778.7	turquoise
ENSG00000143499.13	blue
ENSG00000162994.15	turquoise
ENSG00000115163.14	blue
ENSG00000149554.12	blue
ENSG00000177042.14	turquoise
ENSG00000225313.5	turquoise
ENSG00000130669.17	blue
ENSG00000061938.16	turquoise
ENSG00000182168.14	grey
ENSG00000160072.19	blue
ENSG00000100055.20	green
ENSG00000019485.12	turquoise
ENSG00000095564.13	brown
ENSG00000135407.10	brown
ENSG00000154655.14	brown
ENSG00000226781.1	blue
ENSG00000132274.15	green
ENSG00000196932.11	grey
ENSG00000172893.15	yellow
ENSG00000105649.9	yellow
ENSG00000269906.1	blue
ENSG00000103168.16	turquoise
ENSG00000258399.6	grey
ENSG00000119900.7	green
ENSG00000124257.6	green
ENSG00000114771.13	grey
ENSG00000135604.9	green
ENSG00000102003.10	yellow
ENSG00000123636.17	turquoise
ENSG00000143632.14	blue
ENSG00000256525.6	turquoise
ENSG00000196812.4	turquoise
ENSG00000183049.12	brown
ENSG00000234743.1	turquoise
ENSG00000214021.15	brown
ENSG00000106268.15	blue
ENSG00000241489.7	brown
ENSG00000140563.14	green
ENSG00000274012.1	turquoise
ENSG00000215041.9	turquoise
ENSG00000094804.9	blue
ENSG00000072210.18	turquoise
ENSG00000138688.15	brown
ENSG00000000938.12	green
ENSG00000222020.2	grey
ENSG00000179271.2	green
ENSG00000110799.13	turquoise
ENSG00000225828.1	blue
ENSG00000120049.18	turquoise
ENSG00000134444.13	turquoise
ENSG00000243679.1	brown
ENSG00000236540.7	turquoise
ENSG00000242086.8	brown
ENSG00000165171.10	turquoise
ENSG00000136040.8	turquoise
ENSG00000277531.1	green
ENSG00000173535.13	brown
ENSG00000129467.13	red
ENSG00000120837.7	turquoise
ENSG00000234289.5	blue
ENSG00000276547.1	turquoise
ENSG00000172935.8	black
ENSG00000100285.9	turquoise
ENSG00000214944.9	turquoise
ENSG00000167549.18	turquoise
ENSG00000139343.10	blue
ENSG00000079462.7	blue
ENSG00000055732.12	grey
ENSG00000168026.16	brown
ENSG00000276529.1	pink
ENSG00000121769.7	yellow
ENSG00000104972.14	green
ENSG00000178531.5	blue
ENSG00000110921.11	yellow
ENSG00000146192.14	green
ENSG00000120915.13	turquoise
ENSG00000011347.9	blue
ENSG00000173193.13	turquoise
ENSG00000251474.6	brown
ENSG00000205181.5	turquoise
ENSG00000119535.17	green
ENSG00000162482.4	blue
ENSG00000174233.11	turquoise
ENSG00000117425.13	blue
ENSG00000188215.9	turquoise
ENSG00000172915.18	turquoise
ENSG00000267532.3	black
ENSG00000184584.12	green
ENSG00000280077.1	turquoise
ENSG00000234684.6	turquoise
ENSG00000272645.2	brown
ENSG00000182544.8	turquoise
ENSG00000088325.15	blue
ENSG00000065029.14	turquoise
ENSG00000137462.6	green
ENSG00000079277.19	turquoise
ENSG00000150672.16	grey
ENSG00000198692.9	grey
ENSG00000205702.10	blue
ENSG00000268191.1	green
ENSG00000136997.14	turquoise
ENSG00000198089.14	turquoise
ENSG00000273117.1	yellow
ENSG00000277283.1	blue
ENSG00000147647.12	grey
ENSG00000187800.13	red
ENSG00000166819.11	yellow
ENSG00000105835.11	turquoise
ENSG00000138380.17	turquoise
ENSG00000122176.10	black
ENSG00000162433.14	blue
ENSG00000129993.14	brown
ENSG00000161281.10	blue
ENSG00000272742.1	pink
ENSG00000140416.19	turquoise
ENSG00000146242.8	blue
ENSG00000276691.1	brown
ENSG00000168970.20	brown
ENSG00000134201.10	black
ENSG00000263563.5	turquoise
ENSG00000163660.11	brown
ENSG00000279118.1	red
ENSG00000000971.15	black
ENSG00000165810.16	turquoise
ENSG00000275023.4	turquoise
ENSG00000277701.4	grey
ENSG00000185513.14	brown
ENSG00000150275.17	grey
ENSG00000172878.13	turquoise
ENSG00000112695.11	yellow
ENSG00000173641.17	blue
ENSG00000197182.12	blue
ENSG00000171401.14	grey
ENSG00000134339.8	grey
ENSG00000243964.1	turquoise
ENSG00000148154.9	yellow
ENSG00000213853.9	blue
ENSG00000167601.11	green
ENSG00000156804.7	green
ENSG00000071462.11	blue
ENSG00000187741.14	blue
ENSG00000224956.5	turquoise
ENSG00000105486.13	blue
ENSG00000184162.14	blue
ENSG00000162614.18	red
ENSG00000135525.18	turquoise
ENSG00000223572.9	brown
ENSG00000279392.1	blue
ENSG00000143653.9	turquoise
ENSG00000173432.10	grey
ENSG00000103723.12	turquoise
ENSG00000157502.12	grey
ENSG00000235174.1	turquoise
ENSG00000147465.11	yellow
ENSG00000197816.13	brown
ENSG00000239665.8	brown
ENSG00000074964.16	turquoise
ENSG00000100604.12	grey
ENSG00000166927.12	green
ENSG00000168234.12	turquoise
ENSG00000198399.14	turquoise
ENSG00000087245.12	green
ENSG00000101187.15	turquoise
ENSG00000172824.14	blue
ENSG00000105223.18	blue
ENSG00000100393.9	turquoise
ENSG00000131584.18	turquoise
ENSG00000149131.15	green
ENSG00000012171.17	turquoise
ENSG00000135446.16	blue
ENSG00000136895.18	brown
ENSG00000080986.12	blue
ENSG00000272540.1	turquoise
ENSG00000205746.9	brown
ENSG00000136842.13	blue
ENSG00000119630.13	blue
ENSG00000099822.2	yellow
ENSG00000183054.11	turquoise
ENSG00000158286.12	turquoise
ENSG00000182162.9	turquoise
ENSG00000223705.9	brown
ENSG00000118194.18	green
ENSG00000057704.10	turquoise
ENSG00000268439.5	turquoise
ENSG00000186205.12	yellow
ENSG00000214975.4	blue
ENSG00000037757.13	turquoise
ENSG00000114544.15	brown
ENSG00000137841.11	green
ENSG00000127585.11	yellow
ENSG00000006071.11	grey
ENSG00000111110.11	turquoise
ENSG00000105419.17	blue
ENSG00000012817.15	grey
ENSG00000272478.1	grey
ENSG00000168496.3	blue
ENSG00000099904.15	turquoise
ENSG00000177679.15	yellow
ENSG00000233270.1	turquoise
ENSG00000177337.7	grey
ENSG00000160233.7	turquoise
ENSG00000105278.10	grey
ENSG00000188185.11	brown
ENSG00000241186.7	turquoise
ENSG00000106025.8	brown
ENSG00000166557.12	blue
ENSG00000111247.14	blue
ENSG00000163687.13	blue
ENSG00000015568.12	turquoise
ENSG00000259357.2	pink
ENSG00000068024.16	turquoise
ENSG00000149527.17	grey
ENSG00000257167.2	blue
ENSG00000241014.1	turquoise
ENSG00000091428.17	turquoise
ENSG00000237441.9	turquoise
ENSG00000005073.5	blue
ENSG00000116001.15	turquoise
ENSG00000267059.2	turquoise
ENSG00000185561.9	turquoise
ENSG00000145779.7	green
ENSG00000186510.11	green
ENSG00000167767.13	turquoise
ENSG00000204622.10	grey
ENSG00000107968.9	green
ENSG00000109686.16	red
ENSG00000166405.14	yellow
ENSG00000258441.1	turquoise
ENSG00000224660.1	turquoise
ENSG00000168476.11	blue
ENSG00000257379.1	brown
ENSG00000282031.1	grey
ENSG00000169896.16	green
ENSG00000138449.10	green
ENSG00000196353.11	blue
ENSG00000161888.11	blue
ENSG00000138468.15	brown
ENSG00000227051.5	turquoise
ENSG00000220785.7	green
ENSG00000119943.10	green
ENSG00000017427.15	green
ENSG00000181195.10	grey
ENSG00000135114.12	blue
ENSG00000158863.21	turquoise
ENSG00000108176.14	turquoise
ENSG00000168679.17	green
ENSG00000184677.16	turquoise
ENSG00000261556.8	brown
ENSG00000169783.12	turquoise
ENSG00000043462.11	green
ENSG00000268083.5	pink
ENSG00000268942.2	blue
ENSG00000174405.13	turquoise
ENSG00000176909.11	yellow
ENSG00000072840.12	yellow
ENSG00000205277.9	blue
ENSG00000224081.7	turquoise
ENSG00000130147.15	yellow
ENSG00000105519.12	turquoise
ENSG00000172716.16	green
ENSG00000174562.13	brown
ENSG00000166851.14	blue
ENSG00000269068.1	yellow
ENSG00000182109.7	turquoise
ENSG00000269145.2	pink
ENSG00000273361.1	turquoise
ENSG00000186076.5	turquoise
ENSG00000270231.3	turquoise
ENSG00000198910.12	turquoise
ENSG00000121858.10	turquoise
ENSG00000183763.8	blue
ENSG00000277072.4	brown
ENSG00000134115.12	grey
ENSG00000279246.1	turquoise
ENSG00000187479.5	black
ENSG00000185269.11	blue
ENSG00000164292.12	turquoise
ENSG00000135045.6	blue
ENSG00000172650.12	brown
ENSG00000139668.8	turquoise
ENSG00000143028.8	turquoise
ENSG00000135821.16	turquoise
ENSG00000215252.11	brown
ENSG00000262967.1	pink
ENSG00000104368.17	green
ENSG00000164181.13	brown
ENSG00000179142.2	green
ENSG00000254995.4	brown
ENSG00000126803.9	grey
ENSG00000188322.4	yellow
ENSG00000103381.11	turquoise
ENSG00000272368.2	yellow
ENSG00000135127.11	blue
ENSG00000107147.11	yellow
ENSG00000132561.13	red
ENSG00000105880.4	blue
ENSG00000184752.12	blue
ENSG00000141540.10	turquoise
ENSG00000244165.1	blue
ENSG00000181625.17	turquoise
ENSG00000090975.12	turquoise
ENSG00000214456.8	turquoise
ENSG00000047346.12	turquoise
ENSG00000077238.13	red
ENSG00000136144.11	turquoise
ENSG00000101197.12	grey
ENSG00000185920.15	turquoise
ENSG00000261641.2	pink
ENSG00000276664.1	turquoise
ENSG00000141448.8	turquoise
ENSG00000152137.6	brown
ENSG00000105339.10	green
ENSG00000112559.13	black
ENSG00000264350.1	blue
ENSG00000075218.18	blue
ENSG00000100479.12	blue
ENSG00000260231.1	turquoise
ENSG00000181222.14	turquoise
ENSG00000006210.6	turquoise
ENSG00000164211.12	yellow
ENSG00000230043.1	grey
ENSG00000169758.12	green
ENSG00000169393.8	grey
ENSG00000244482.9	green
ENSG00000053918.15	blue
ENSG00000119915.4	yellow
ENSG00000261505.1	brown
ENSG00000187955.11	green
ENSG00000241399.6	turquoise
ENSG00000198125.12	turquoise
ENSG00000075651.15	turquoise
ENSG00000105409.15	yellow
ENSG00000091879.13	blue
ENSG00000102409.9	brown
ENSG00000148218.15	turquoise
ENSG00000135926.12	turquoise
ENSG00000148468.16	yellow
ENSG00000164032.11	blue
ENSG00000135454.13	blue
ENSG00000245849.6	brown
ENSG00000130829.17	blue
ENSG00000276997.4	brown
ENSG00000072952.18	turquoise
ENSG00000196268.11	brown
ENSG00000229474.6	green
ENSG00000235957.1	grey
ENSG00000254667.2	yellow
ENSG00000082397.15	turquoise
ENSG00000175084.11	black
ENSG00000125378.15	yellow
ENSG00000198198.13	blue
ENSG00000204946.9	turquoise
ENSG00000159723.4	yellow
ENSG00000133121.20	turquoise
ENSG00000019549.8	blue
ENSG00000117594.9	black
ENSG00000196616.12	black
ENSG00000259366.1	turquoise
ENSG00000185829.15	turquoise
ENSG00000132718.8	red
ENSG00000013375.15	turquoise
ENSG00000179909.15	grey
ENSG00000133392.16	black
ENSG00000167775.10	blue
ENSG00000249550.6	yellow
ENSG00000176728.7	grey
ENSG00000128512.19	green
ENSG00000278784.1	turquoise
ENSG00000133216.16	blue
ENSG00000279307.1	turquoise
ENSG00000169439.11	turquoise
ENSG00000232456.1	turquoise
ENSG00000228716.6	blue
ENSG00000170837.2	grey
ENSG00000237575.4	grey
ENSG00000162063.12	blue
ENSG00000085117.11	turquoise
ENSG00000186814.12	turquoise
ENSG00000228594.3	yellow
ENSG00000183036.10	yellow
ENSG00000035499.12	blue
ENSG00000241015.2	turquoise
ENSG00000214135.8	brown
ENSG00000186350.9	turquoise
ENSG00000275496.4	blue
ENSG00000186204.14	blue
ENSG00000184110.14	pink
ENSG00000072682.18	blue
ENSG00000237732.9	yellow
ENSG00000274104.1	blue
ENSG00000108349.14	turquoise
ENSG00000228113.7	grey
ENSG00000168010.10	turquoise
ENSG00000163794.6	blue
ENSG00000228812.7	blue
ENSG00000141458.12	yellow
ENSG00000090905.17	brown
ENSG00000247627.2	turquoise
ENSG00000214855.9	turquoise
ENSG00000123999.4	yellow
ENSG00000163132.6	yellow
ENSG00000102547.18	red
ENSG00000001630.15	yellow
ENSG00000235703.5	brown
ENSG00000167747.13	blue
ENSG00000104889.4	blue
ENSG00000099204.18	turquoise
ENSG00000171848.13	blue
ENSG00000130332.14	blue
ENSG00000204338.8	yellow
ENSG00000087502.17	blue
ENSG00000235162.8	grey
ENSG00000173531.15	turquoise
ENSG00000137077.7	black
ENSG00000257093.6	turquoise
ENSG00000177675.8	green
ENSG00000232859.9	turquoise
ENSG00000165215.6	grey
ENSG00000141576.14	grey
ENSG00000101311.15	turquoise
ENSG00000167513.8	blue
ENSG00000105695.14	turquoise
ENSG00000121310.16	turquoise
ENSG00000197766.7	green
ENSG00000277867.1	grey
ENSG00000129757.12	grey
ENSG00000149557.12	grey
ENSG00000125447.16	turquoise
ENSG00000143416.20	green
ENSG00000144802.11	green
ENSG00000198520.10	green
ENSG00000198258.10	yellow
ENSG00000163251.3	turquoise
ENSG00000177663.13	turquoise
ENSG00000177575.12	green
ENSG00000279716.1	brown
ENSG00000103528.16	grey
ENSG00000139131.12	blue
ENSG00000189143.9	blue
ENSG00000151131.9	blue
ENSG00000102144.13	turquoise
ENSG00000074356.16	turquoise
ENSG00000180902.16	turquoise
ENSG00000069399.12	blue
ENSG00000101104.12	blue
ENSG00000118276.11	turquoise
ENSG00000228492.2	brown
ENSG00000167604.13	green
ENSG00000177000.10	turquoise
ENSG00000223403.3	grey
ENSG00000171617.13	blue
ENSG00000183458.13	brown
ENSG00000124479.8	blue
ENSG00000102878.15	brown
ENSG00000163823.3	green
ENSG00000132680.10	turquoise
ENSG00000265303.1	pink
ENSG00000217555.12	blue
ENSG00000177875.4	yellow
ENSG00000102034.16	turquoise
ENSG00000273373.1	blue
ENSG00000215218.3	yellow
ENSG00000146674.14	red
ENSG00000102606.17	turquoise
ENSG00000145649.7	green
ENSG00000146918.19	blue
ENSG00000181444.12	grey
ENSG00000167608.11	grey
ENSG00000123219.12	blue
ENSG00000169554.16	turquoise
ENSG00000162572.19	turquoise
ENSG00000270580.5	turquoise
ENSG00000111639.7	blue
ENSG00000162407.8	red
ENSG00000185291.10	green
ENSG00000235027.1	turquoise
ENSG00000167900.11	blue
ENSG00000196660.10	yellow
ENSG00000108654.11	turquoise
ENSG00000237289.9	brown
ENSG00000133138.19	brown
ENSG00000197696.9	blue
ENSG00000172403.10	red
ENSG00000132906.17	yellow
ENSG00000205220.11	turquoise
ENSG00000136867.10	yellow
ENSG00000139178.10	brown
ENSG00000205517.12	grey
ENSG00000065621.14	turquoise
ENSG00000133056.13	red
ENSG00000172456.16	turquoise
ENSG00000269955.2	turquoise
ENSG00000231365.5	turquoise
ENSG00000081237.18	green
ENSG00000124212.5	black
ENSG00000270082.1	pink
ENSG00000144369.12	turquoise
ENSG00000173227.13	blue
ENSG00000197774.12	brown
ENSG00000142303.13	brown
ENSG00000142102.15	blue
ENSG00000101210.10	yellow
ENSG00000149499.11	turquoise
ENSG00000245694.8	blue
ENSG00000224046.1	turquoise
ENSG00000170581.13	turquoise
ENSG00000088448.14	turquoise
ENSG00000165275.9	turquoise
ENSG00000103363.14	pink
ENSG00000153560.11	turquoise
ENSG00000214827.9	pink
ENSG00000166130.14	blue
ENSG00000144642.20	turquoise
ENSG00000172346.14	blue
ENSG00000114279.13	yellow
ENSG00000099797.11	green
ENSG00000169213.6	yellow
ENSG00000066279.16	blue
ENSG00000156298.12	yellow
ENSG00000078269.13	blue
ENSG00000108773.10	turquoise
ENSG00000229833.9	blue
ENSG00000106066.13	green
ENSG00000162073.13	blue
ENSG00000196123.12	brown
ENSG00000165699.13	turquoise
ENSG00000117399.13	blue
ENSG00000119771.14	yellow
ENSG00000237296.9	turquoise
ENSG00000185813.10	yellow
ENSG00000244398.1	blue
ENSG00000171291.8	green
ENSG00000055118.14	blue
ENSG00000100181.21	grey
ENSG00000261684.1	pink
ENSG00000213366.12	grey
ENSG00000204060.5	grey
ENSG00000260091.1	brown
ENSG00000104327.7	yellow
ENSG00000169085.11	turquoise
ENSG00000183878.15	grey
ENSG00000076003.4	blue
ENSG00000066382.16	grey
ENSG00000282508.1	turquoise
ENSG00000138834.12	brown
ENSG00000267007.1	pink
ENSG00000054392.12	turquoise
ENSG00000238083.7	turquoise
ENSG00000090889.11	blue
ENSG00000037280.15	red
ENSG00000109062.9	turquoise
ENSG00000011426.10	blue
ENSG00000223509.8	turquoise
ENSG00000013810.18	blue
ENSG00000143624.13	turquoise
ENSG00000083857.13	blue
ENSG00000164877.18	turquoise
ENSG00000270605.1	brown
ENSG00000149782.11	turquoise
ENSG00000050438.16	yellow
ENSG00000186010.18	blue
ENSG00000274049.4	turquoise
ENSG00000128271.19	red
ENSG00000266820.1	brown
ENSG00000164484.11	yellow
ENSG00000189007.15	turquoise
ENSG00000230629.2	turquoise
ENSG00000186594.12	turquoise
ENSG00000065357.19	blue
ENSG00000170089.15	blue
ENSG00000183793.13	grey
ENSG00000153902.13	green
ENSG00000115884.10	blue
ENSG00000113296.14	turquoise
ENSG00000062822.12	blue
ENSG00000079257.7	turquoise
ENSG00000158526.7	brown
ENSG00000249971.1	pink
ENSG00000100365.14	green
ENSG00000243004.5	turquoise
ENSG00000146386.7	turquoise
ENSG00000244257.5	brown
ENSG00000229152.2	brown
ENSG00000247679.2	brown
ENSG00000125835.17	blue
ENSG00000126709.14	blue
ENSG00000162494.5	yellow
ENSG00000197971.14	green
ENSG00000137504.13	turquoise
ENSG00000236017.7	brown
ENSG00000183671.12	yellow
ENSG00000168066.20	turquoise
ENSG00000266402.3	turquoise
ENSG00000277075.1	blue
ENSG00000103196.11	red
ENSG00000120262.9	yellow
ENSG00000162599.15	turquoise
ENSG00000237991.3	blue
ENSG00000258232.2	green
ENSG00000268621.5	blue
ENSG00000250151.9	turquoise
ENSG00000165449.11	blue
ENSG00000129991.12	green
ENSG00000186827.10	green
ENSG00000180879.13	blue
ENSG00000162971.10	turquoise
ENSG00000220205.8	turquoise
ENSG00000090686.15	turquoise
ENSG00000168995.13	green
ENSG00000263400.6	turquoise
ENSG00000272870.1	blue
ENSG00000146540.14	turquoise
ENSG00000167552.13	turquoise
ENSG00000260465.1	pink
ENSG00000144040.12	blue
ENSG00000136026.13	blue
ENSG00000243716.10	brown
ENSG00000250988.7	turquoise
ENSG00000167244.17	grey
ENSG00000155324.9	turquoise
ENSG00000213347.10	blue
ENSG00000227053.1	grey
ENSG00000234906.8	green
ENSG00000165591.6	brown
ENSG00000135541.20	turquoise
ENSG00000112146.16	turquoise
ENSG00000042832.11	blue
ENSG00000137501.16	yellow
ENSG00000266642.2	red
ENSG00000245848.2	turquoise
ENSG00000263986.1	pink
ENSG00000160180.15	red
ENSG00000196696.12	brown
ENSG00000144485.10	blue
ENSG00000235033.7	grey
ENSG00000075618.17	blue
ENSG00000085733.15	turquoise
ENSG00000158815.10	turquoise
ENSG00000141646.13	turquoise
ENSG00000181191.11	turquoise
ENSG00000118058.20	turquoise
ENSG00000185347.17	blue
ENSG00000177374.12	red
ENSG00000177685.16	turquoise
ENSG00000169045.17	turquoise
ENSG00000266036.1	turquoise
ENSG00000152154.10	brown
ENSG00000132122.11	turquoise
ENSG00000244716.3	turquoise
ENSG00000148773.12	blue
ENSG00000117632.20	blue
ENSG00000132031.12	blue
ENSG00000105374.9	green
ENSG00000110092.3	turquoise
ENSG00000164050.12	turquoise
ENSG00000182230.11	brown
ENSG00000149532.15	turquoise
ENSG00000088356.5	blue
ENSG00000185834.10	black
ENSG00000186088.15	brown
ENSG00000124593.14	turquoise
ENSG00000249626.1	turquoise
ENSG00000140284.10	blue
ENSG00000038945.14	green
ENSG00000189339.11	turquoise
ENSG00000159713.10	blue
ENSG00000146094.13	green
ENSG00000258608.1	green
ENSG00000234353.2	turquoise
ENSG00000164294.13	blue
ENSG00000263345.1	brown
ENSG00000206530.8	brown
ENSG00000224945.1	grey
ENSG00000198625.12	turquoise
ENSG00000102359.5	black
ENSG00000158402.18	blue
ENSG00000172766.18	turquoise
ENSG00000164109.13	blue
ENSG00000227953.6	turquoise
ENSG00000111640.14	blue
ENSG00000145022.4	turquoise
ENSG00000236871.6	brown
ENSG00000228315.11	turquoise
ENSG00000168060.14	red
ENSG00000272644.1	pink
ENSG00000147100.9	turquoise
ENSG00000119969.14	blue
ENSG00000124491.15	green
ENSG00000108448.20	turquoise
ENSG00000143442.21	turquoise
ENSG00000188372.14	blue
ENSG00000100038.19	blue
ENSG00000244486.7	black
ENSG00000157404.15	turquoise
ENSG00000178607.15	yellow
ENSG00000170231.15	grey
ENSG00000162461.7	grey
ENSG00000262528.2	yellow
ENSG00000249592.5	turquoise
ENSG00000103647.12	black
ENSG00000141279.15	turquoise
ENSG00000082482.13	turquoise
ENSG00000131398.13	brown
ENSG00000166148.3	turquoise
ENSG00000124767.6	yellow
ENSG00000118785.13	blue
ENSG00000104177.17	turquoise
ENSG00000116754.13	turquoise
ENSG00000139914.6	yellow
ENSG00000169330.8	yellow
ENSG00000184672.11	yellow
ENSG00000137474.19	grey
ENSG00000279364.1	pink
ENSG00000163539.15	turquoise
ENSG00000127603.23	turquoise
ENSG00000250090.1	grey
ENSG00000184206.11	brown
ENSG00000105173.13	blue
ENSG00000235776.2	blue
ENSG00000072062.13	yellow
ENSG00000169641.13	turquoise
ENSG00000158813.17	brown
ENSG00000280874.1	grey
ENSG00000123485.11	blue
ENSG00000113810.15	blue
ENSG00000262655.3	black
ENSG00000244701.1	red
ENSG00000281383.1	grey
ENSG00000135722.8	brown
ENSG00000106483.11	black
ENSG00000042980.12	green
ENSG00000129682.13	red
ENSG00000125995.15	blue
ENSG00000168268.10	blue
ENSG00000213626.11	blue
ENSG00000152503.9	brown
ENSG00000179604.9	turquoise
ENSG00000101057.15	blue
ENSG00000244094.1	grey
ENSG00000112378.11	yellow
ENSG00000122435.9	turquoise
ENSG00000145029.11	turquoise
ENSG00000265018.6	brown
ENSG00000196187.11	turquoise
ENSG00000131773.13	turquoise
ENSG00000072163.18	red
ENSG00000020577.13	turquoise
ENSG00000110079.16	green
ENSG00000109846.7	grey
ENSG00000103005.11	blue
ENSG00000123454.10	green
ENSG00000127954.12	green
ENSG00000183091.19	turquoise
ENSG00000272030.1	turquoise
ENSG00000214455.4	turquoise
ENSG00000118004.17	black
ENSG00000136877.14	turquoise
ENSG00000160932.10	grey
ENSG00000237264.4	turquoise
ENSG00000072310.16	turquoise
ENSG00000234420.7	brown
ENSG00000140398.13	turquoise
ENSG00000159761.14	turquoise
ENSG00000172273.12	turquoise
ENSG00000153132.12	grey
ENSG00000278371.2	turquoise
ENSG00000116731.22	turquoise
ENSG00000153006.14	pink
ENSG00000229589.1	brown
ENSG00000170919.15	turquoise
ENSG00000139263.11	blue
ENSG00000166801.15	turquoise
ENSG00000275896.4	blue
ENSG00000270136.5	blue
ENSG00000275688.4	red
ENSG00000123975.4	blue
ENSG00000276168.1	turquoise
ENSG00000095380.10	blue
ENSG00000130479.10	blue
ENSG00000119707.13	turquoise
ENSG00000026025.13	blue
ENSG00000142945.12	blue
ENSG00000264019.1	pink
ENSG00000074211.13	pink
ENSG00000223749.7	blue
ENSG00000173821.19	turquoise
ENSG00000115919.14	green
ENSG00000111319.12	turquoise
ENSG00000247095.2	blue
ENSG00000132016.11	blue
ENSG00000234912.9	turquoise
ENSG00000262903.1	brown
ENSG00000255072.1	turquoise
ENSG00000131174.4	brown
ENSG00000159399.9	turquoise
ENSG00000156869.12	turquoise
ENSG00000160957.12	blue
ENSG00000087460.23	grey
ENSG00000261061.1	blue
ENSG00000166033.11	turquoise
ENSG00000266010.1	yellow
ENSG00000126432.13	yellow
ENSG00000187922.13	grey
ENSG00000219928.2	turquoise
ENSG00000236756.4	pink
ENSG00000246705.4	grey
ENSG00000258461.5	brown
ENSG00000198142.4	turquoise
ENSG00000273136.5	turquoise
ENSG00000084444.13	turquoise
ENSG00000106400.11	blue
ENSG00000138606.19	turquoise
ENSG00000167131.16	turquoise
ENSG00000088882.7	black
ENSG00000259244.1	brown
ENSG00000181751.9	turquoise
ENSG00000112877.7	blue
ENSG00000238035.8	brown
ENSG00000163516.13	turquoise
ENSG00000107159.12	grey
ENSG00000225032.5	turquoise
ENSG00000112214.10	red
ENSG00000165923.15	turquoise
ENSG00000259134.5	black
ENSG00000139505.11	turquoise
ENSG00000266964.5	black
ENSG00000204072.3	pink
ENSG00000076555.15	turquoise
ENSG00000214331.8	turquoise
ENSG00000273173.5	turquoise
ENSG00000203709.9	brown
ENSG00000011258.15	turquoise
ENSG00000165548.10	yellow
ENSG00000206573.8	turquoise
ENSG00000170890.13	yellow
ENSG00000127528.5	black
ENSG00000243137.7	grey
ENSG00000240801.1	grey
ENSG00000224578.4	blue
ENSG00000113108.17	brown
ENSG00000145386.9	blue
ENSG00000132646.10	blue
ENSG00000276043.4	blue
ENSG00000071539.13	blue
ENSG00000172201.10	black
ENSG00000132199.18	turquoise
ENSG00000152518.6	turquoise
ENSG00000172183.14	blue
ENSG00000100422.13	turquoise
ENSG00000237172.3	blue
ENSG00000228172.5	turquoise
ENSG00000123415.14	blue
ENSG00000240731.1	turquoise
ENSG00000280153.1	green
ENSG00000187699.10	grey
ENSG00000130700.6	turquoise
ENSG00000117640.17	turquoise
ENSG00000197442.9	turquoise
ENSG00000214194.8	turquoise
ENSG00000149948.13	blue
ENSG00000231721.6	brown
ENSG00000262831.1	pink
ENSG00000169612.3	blue
ENSG00000135063.17	brown
ENSG00000096088.16	grey
ENSG00000185559.13	yellow
ENSG00000166507.16	turquoise
ENSG00000124216.3	green
ENSG00000106031.7	blue
ENSG00000006118.14	blue
ENSG00000138160.5	blue
ENSG00000278274.1	grey
ENSG00000177106.14	turquoise
ENSG00000060718.18	yellow
ENSG00000188985.6	turquoise
ENSG00000113328.18	turquoise
ENSG00000081052.11	grey
ENSG00000145623.12	turquoise
ENSG00000135211.5	turquoise
ENSG00000227671.4	turquoise
ENSG00000253764.1	green
ENSG00000163083.5	red
ENSG00000008735.13	turquoise
ENSG00000263812.5	turquoise
ENSG00000280128.1	turquoise
ENSG00000242125.3	blue
ENSG00000178971.13	turquoise
ENSG00000179583.17	green
ENSG00000262304.1	turquoise
ENSG00000237298.8	turquoise
ENSG00000122952.16	blue
ENSG00000271383.6	turquoise
ENSG00000272912.1	green
ENSG00000008311.14	turquoise
ENSG00000167895.14	green
ENSG00000268790.5	turquoise
ENSG00000187608.8	blue
ENSG00000279909.1	pink
ENSG00000174371.16	blue
ENSG00000255455.2	turquoise
ENSG00000100058.12	blue
ENSG00000152377.12	yellow
ENSG00000253552.7	turquoise
ENSG00000112562.18	green
ENSG00000106367.13	yellow
ENSG00000168906.12	turquoise
ENSG00000143590.13	yellow
ENSG00000188312.13	blue
ENSG00000227543.4	brown
ENSG00000011021.21	turquoise
ENSG00000219529.2	blue
ENSG00000263873.1	turquoise
ENSG00000146147.14	grey
ENSG00000152932.7	grey
ENSG00000127863.15	turquoise
ENSG00000251322.7	red
ENSG00000150594.6	yellow
ENSG00000165168.7	green
ENSG00000260565.6	brown
ENSG00000111799.20	red
ENSG00000175832.12	yellow
ENSG00000181163.13	turquoise
ENSG00000174370.9	green
ENSG00000214447.4	turquoise
ENSG00000188783.5	black
ENSG00000036565.14	green
ENSG00000049130.13	red
ENSG00000258017.1	pink
ENSG00000225573.4	blue
ENSG00000229036.7	turquoise
ENSG00000100941.8	turquoise
ENSG00000198130.14	turquoise
ENSG00000134884.13	turquoise
ENSG00000243244.5	red
ENSG00000127415.12	turquoise
ENSG00000056558.10	brown
ENSG00000161835.10	red
ENSG00000135519.6	yellow
ENSG00000196295.11	turquoise
ENSG00000144843.11	green
ENSG00000282608.1	green
ENSG00000090659.17	green
ENSG00000213178.3	blue
ENSG00000133878.8	blue
ENSG00000092421.16	blue
ENSG00000141391.13	turquoise
ENSG00000272414.5	turquoise
ENSG00000154589.6	green
ENSG00000168490.13	grey
ENSG00000089327.14	green
ENSG00000167995.15	green
ENSG00000142627.12	red
ENSG00000228672.3	yellow
ENSG00000221946.7	grey
ENSG00000238045.9	brown
ENSG00000176222.8	brown
ENSG00000225217.1	green
ENSG00000277034.1	grey
ENSG00000111331.12	blue
ENSG00000109046.14	brown
ENSG00000239704.10	pink
ENSG00000140519.12	yellow
ENSG00000187601.4	turquoise
ENSG00000280843.1	grey
ENSG00000099282.9	blue
ENSG00000113231.13	turquoise
ENSG00000052802.12	yellow
ENSG00000140285.9	red
ENSG00000058335.15	blue
ENSG00000091704.9	grey
ENSG00000174640.12	red
ENSG00000276771.1	grey
ENSG00000112739.16	turquoise
ENSG00000158805.11	turquoise
ENSG00000154262.12	green
ENSG00000100330.15	turquoise
ENSG00000115129.13	turquoise
ENSG00000254909.1	brown
ENSG00000010818.8	turquoise
ENSG00000206145.8	blue
ENSG00000169957.9	turquoise
ENSG00000088827.12	green
ENSG00000103091.14	turquoise
ENSG00000065268.10	blue
ENSG00000134253.9	turquoise
ENSG00000085563.14	yellow
ENSG00000116106.11	blue
ENSG00000181790.10	yellow
ENSG00000165495.15	black
ENSG00000143476.17	blue
ENSG00000135750.14	grey
ENSG00000180139.11	black
ENSG00000165949.12	blue
ENSG00000240303.7	turquoise
ENSG00000244560.6	brown
ENSG00000105855.9	blue
ENSG00000204618.8	blue
ENSG00000080644.15	yellow
ENSG00000247809.7	turquoise
ENSG00000241644.2	black
ENSG00000142599.17	turquoise
ENSG00000274253.4	grey
ENSG00000138080.13	black
ENSG00000272752.5	brown
ENSG00000166451.13	blue
ENSG00000072832.14	blue
ENSG00000131470.14	blue
ENSG00000175063.16	blue
ENSG00000185633.10	red
ENSG00000089351.14	turquoise
ENSG00000146670.9	blue
ENSG00000102890.14	grey
ENSG00000125895.5	yellow
ENSG00000187961.13	blue
ENSG00000140263.13	turquoise
ENSG00000229183.8	turquoise
ENSG00000134222.16	blue
ENSG00000158186.12	turquoise
ENSG00000122644.12	blue
ENSG00000130948.9	grey
ENSG00000212802.4	turquoise
ENSG00000131143.8	pink
ENSG00000203760.8	blue
ENSG00000273047.1	blue
ENSG00000115419.12	turquoise
ENSG00000125356.6	blue
ENSG00000197321.14	red
ENSG00000073464.11	brown
ENSG00000144791.9	turquoise
ENSG00000158555.14	blue
ENSG00000188038.7	yellow
ENSG00000256546.1	blue
ENSG00000103740.9	turquoise
ENSG00000116095.10	turquoise
ENSG00000137710.14	turquoise
ENSG00000053900.10	turquoise
ENSG00000255769.7	turquoise
ENSG00000196549.10	yellow
ENSG00000106538.9	blue
ENSG00000134955.11	green
ENSG00000113580.14	turquoise
ENSG00000100504.16	green
ENSG00000050405.13	turquoise
ENSG00000182541.17	turquoise
ENSG00000105928.13	red
ENSG00000141519.14	turquoise
ENSG00000171522.5	green
ENSG00000077157.20	turquoise
ENSG00000170540.14	turquoise
ENSG00000076662.9	turquoise
ENSG00000162402.12	turquoise
ENSG00000197614.10	black
ENSG00000241860.6	turquoise
ENSG00000131203.12	green
ENSG00000215769.8	brown
ENSG00000147041.11	blue
ENSG00000101003.9	blue
ENSG00000140678.16	green
ENSG00000127957.16	turquoise
ENSG00000143839.13	yellow
ENSG00000145020.14	brown
ENSG00000175164.13	brown
ENSG00000119408.16	blue
ENSG00000196352.13	turquoise
ENSG00000178796.12	blue
ENSG00000125352.5	turquoise
ENSG00000184557.4	red
ENSG00000124140.12	turquoise
ENSG00000154118.12	yellow
ENSG00000225756.1	black
ENSG00000164318.17	green
ENSG00000123989.13	blue
ENSG00000143110.11	green
ENSG00000227081.5	blue
ENSG00000183837.9	turquoise
ENSG00000140009.18	brown
ENSG00000105516.10	yellow
ENSG00000229344.1	blue
ENSG00000243236.6	yellow
ENSG00000013297.10	black
ENSG00000059145.18	turquoise
ENSG00000169031.18	blue
ENSG00000123131.12	turquoise
ENSG00000130176.7	black
ENSG00000065054.13	red
ENSG00000146374.13	green
ENSG00000165304.7	blue
ENSG00000023909.9	turquoise
ENSG00000099260.10	turquoise
ENSG00000170962.12	turquoise
ENSG00000174353.17	brown
ENSG00000168386.18	green
ENSG00000181744.8	turquoise
ENSG00000107443.15	turquoise
ENSG00000139329.4	black
ENSG00000180806.4	blue
ENSG00000134186.11	turquoise
ENSG00000173540.12	turquoise
ENSG00000171224.8	yellow
ENSG00000090539.15	yellow
ENSG00000156042.17	blue
ENSG00000171208.9	blue
ENSG00000100612.13	turquoise
ENSG00000154734.14	red
ENSG00000172164.13	turquoise
ENSG00000111664.10	yellow
ENSG00000211772.8	green
ENSG00000267484.1	pink
ENSG00000176593.7	brown
ENSG00000108846.15	yellow
ENSG00000230415.1	turquoise
ENSG00000111206.12	blue
ENSG00000123496.7	yellow
ENSG00000135119.14	green
ENSG00000213442.5	blue
ENSG00000274736.4	green
ENSG00000198246.7	turquoise
ENSG00000277734.4	green
ENSG00000215492.6	turquoise
ENSG00000235363.1	blue
ENSG00000270179.1	turquoise
ENSG00000180875.4	yellow
ENSG00000176890.15	blue
ENSG00000244754.8	turquoise
ENSG00000123360.11	green
ENSG00000244242.1	yellow
ENSG00000171608.15	green
ENSG00000246596.6	brown
ENSG00000279560.1	brown
ENSG00000196132.11	yellow
ENSG00000276550.4	turquoise
ENSG00000273478.1	turquoise
ENSG00000205208.4	blue
ENSG00000172159.15	red
ENSG00000112852.6	blue
ENSG00000230163.1	turquoise
ENSG00000008869.11	turquoise
ENSG00000166257.8	turquoise
ENSG00000154258.16	red
ENSG00000180447.6	green
ENSG00000072571.19	blue
ENSG00000263272.1	brown
ENSG00000101194.17	green
ENSG00000257605.2	blue
ENSG00000236060.2	grey
ENSG00000142347.16	green
ENSG00000123064.12	blue
ENSG00000214435.7	grey
ENSG00000135451.12	blue
ENSG00000242779.6	red
ENSG00000166321.13	turquoise
ENSG00000114346.13	blue
ENSG00000179406.6	brown
ENSG00000040531.14	turquoise
ENSG00000025423.11	turquoise
ENSG00000142910.15	red
ENSG00000163635.17	turquoise
ENSG00000065534.18	red
ENSG00000124222.21	turquoise
ENSG00000213326.4	blue
ENSG00000204149.9	brown
ENSG00000109929.9	yellow
ENSG00000258377.1	pink
ENSG00000237125.8	blue
ENSG00000184787.18	turquoise
ENSG00000176171.11	blue
ENSG00000128567.16	red
ENSG00000111196.9	blue
ENSG00000163482.11	turquoise
ENSG00000164124.10	brown
ENSG00000135502.16	yellow
ENSG00000105438.8	blue
ENSG00000273179.1	turquoise
ENSG00000078098.13	blue
ENSG00000130396.20	turquoise
ENSG00000276107.1	red
ENSG00000265298.1	brown
ENSG00000160161.9	blue
ENSG00000007866.18	turquoise
ENSG00000148795.5	yellow
ENSG00000186998.15	yellow
ENSG00000040608.13	yellow
ENSG00000243302.3	brown
ENSG00000141338.13	turquoise
ENSG00000108352.11	turquoise
ENSG00000019991.15	green
ENSG00000099284.13	blue
ENSG00000272763.1	yellow
ENSG00000100030.14	turquoise
ENSG00000067057.16	blue
ENSG00000259738.1	turquoise
ENSG00000146066.2	turquoise
ENSG00000224361.1	yellow
ENSG00000198780.11	yellow
ENSG00000112972.14	yellow
ENSG00000100201.18	turquoise
ENSG00000162873.14	yellow
ENSG00000005379.15	green
ENSG00000163017.13	black
ENSG00000188613.6	turquoise
ENSG00000240990.9	blue
ENSG00000123892.11	yellow
ENSG00000159247.12	yellow
ENSG00000125534.9	grey
ENSG00000134802.17	turquoise
ENSG00000141956.13	turquoise
ENSG00000134897.13	turquoise
ENSG00000173559.12	green
ENSG00000128524.4	blue
ENSG00000197978.9	brown
ENSG00000152359.14	yellow
ENSG00000223612.3	turquoise
ENSG00000159314.11	turquoise
ENSG00000120899.17	turquoise
ENSG00000070404.9	blue
ENSG00000165244.6	blue
ENSG00000259969.1	yellow
ENSG00000188933.14	turquoise
ENSG00000137343.17	blue
ENSG00000262413.1	pink
ENSG00000230373.8	brown
ENSG00000163239.12	red
ENSG00000026559.13	blue
ENSG00000172986.12	turquoise
ENSG00000164616.14	brown
ENSG00000203761.5	turquoise
ENSG00000237984.3	turquoise
ENSG00000263142.5	turquoise
ENSG00000139926.15	blue
ENSG00000243708.8	blue
ENSG00000168487.17	blue
ENSG00000272789.1	red
ENSG00000160882.11	grey
ENSG00000280206.1	blue
ENSG00000077942.17	black
ENSG00000116497.17	blue
ENSG00000004468.12	green
ENSG00000196628.13	turquoise
ENSG00000173757.9	turquoise
ENSG00000067798.13	red
ENSG00000065060.16	turquoise
ENSG00000196218.11	turquoise
ENSG00000280279.1	brown
ENSG00000100526.19	blue
ENSG00000167670.15	blue
ENSG00000128886.11	turquoise
ENSG00000099256.18	turquoise
ENSG00000170458.13	green
ENSG00000160796.16	turquoise
ENSG00000180287.16	yellow
ENSG00000131016.16	turquoise
ENSG00000151725.11	blue
ENSG00000167615.16	brown
ENSG00000138356.13	turquoise
ENSG00000162840.4	grey
ENSG00000131037.14	blue
ENSG00000164611.12	blue
ENSG00000157379.13	turquoise
ENSG00000155265.10	yellow
ENSG00000188559.13	turquoise
ENSG00000164330.16	brown
ENSG00000185924.6	black
ENSG00000197859.9	black
ENSG00000229119.3	blue
ENSG00000176868.2	pink
ENSG00000224126.2	blue
ENSG00000100083.18	turquoise
ENSG00000254109.5	turquoise
ENSG00000270558.1	pink
ENSG00000158966.13	turquoise
ENSG00000119655.8	blue
ENSG00000137310.11	blue
ENSG00000232931.5	brown
ENSG00000159403.15	green
ENSG00000108963.17	turquoise
ENSG00000121281.12	green
ENSG00000160613.12	turquoise
ENSG00000111907.20	yellow
ENSG00000051180.16	blue
ENSG00000022267.16	red
ENSG00000169627.7	pink
ENSG00000221125.2	yellow
ENSG00000103512.14	blue
ENSG00000173868.11	brown
ENSG00000235552.4	blue
ENSG00000104549.11	yellow
ENSG00000164520.11	yellow
ENSG00000105619.13	blue
ENSG00000082512.14	turquoise
ENSG00000115226.9	turquoise
ENSG00000104899.5	blue
ENSG00000105974.11	red
ENSG00000181513.14	turquoise
ENSG00000260793.2	turquoise
ENSG00000101850.12	brown
ENSG00000219481.10	yellow
ENSG00000100982.11	turquoise
ENSG00000146414.15	turquoise
ENSG00000066926.10	turquoise
ENSG00000281419.1	grey
ENSG00000077009.13	yellow
ENSG00000260266.1	yellow
ENSG00000144554.10	blue
ENSG00000102908.20	brown
ENSG00000142731.10	blue
ENSG00000113739.10	turquoise
ENSG00000166446.14	turquoise
ENSG00000080200.9	turquoise
ENSG00000170606.13	blue
ENSG00000110719.9	green
ENSG00000255339.6	brown
ENSG00000140400.14	turquoise
ENSG00000197119.12	blue
ENSG00000266074.8	yellow
ENSG00000188897.8	turquoise
ENSG00000137801.10	red
ENSG00000196155.12	blue
ENSG00000137807.13	blue
ENSG00000175600.15	grey
ENSG00000220804.8	turquoise
ENSG00000205309.13	blue
ENSG00000274877.1	grey
ENSG00000064490.13	blue
ENSG00000239246.3	blue
ENSG00000157778.8	blue
ENSG00000123329.17	green
ENSG00000157087.16	yellow
ENSG00000260230.2	yellow
ENSG00000089127.12	blue
ENSG00000132481.6	grey
ENSG00000257732.1	grey
ENSG00000176444.18	blue
ENSG00000100650.15	turquoise
ENSG00000244682.7	green
ENSG00000129824.15	grey
ENSG00000112936.18	grey
ENSG00000279119.1	turquoise
ENSG00000265519.1	turquoise
ENSG00000145687.15	brown
ENSG00000101204.15	yellow
ENSG00000136383.6	green
ENSG00000269374.1	turquoise
ENSG00000275097.1	turquoise
ENSG00000102172.15	yellow
ENSG00000215704.9	blue
ENSG00000244563.1	blue
ENSG00000196569.11	turquoise
ENSG00000267143.1	grey
ENSG00000184828.9	turquoise
ENSG00000274487.1	turquoise
ENSG00000135414.9	blue
ENSG00000154096.13	red
ENSG00000198932.12	turquoise
ENSG00000111775.2	blue
ENSG00000262919.7	blue
ENSG00000197635.9	turquoise
ENSG00000106236.3	yellow
ENSG00000115290.9	blue
ENSG00000101384.11	blue
ENSG00000164169.12	turquoise
ENSG00000234857.2	turquoise
ENSG00000204789.4	grey
ENSG00000177096.8	black
ENSG00000176155.18	turquoise
ENSG00000213139.7	brown
ENSG00000175287.18	green
ENSG00000234956.5	yellow
ENSG00000177463.15	turquoise
ENSG00000214274.9	turquoise
ENSG00000261801.5	brown
ENSG00000064692.18	green
ENSG00000161642.17	yellow
ENSG00000138964.16	green
ENSG00000160179.18	turquoise
ENSG00000166402.8	turquoise
ENSG00000197106.6	grey
ENSG00000142530.10	green
ENSG00000274602.4	turquoise
ENSG00000203858.3	yellow
ENSG00000010671.15	green
ENSG00000239883.8	turquoise
ENSG00000170542.5	turquoise
ENSG00000274177.1	turquoise
ENSG00000156030.12	turquoise
ENSG00000068650.18	turquoise
ENSG00000184682.5	brown
ENSG00000168309.16	blue
ENSG00000004534.14	turquoise
ENSG00000268069.2	turquoise
ENSG00000118292.8	green
ENSG00000236850.4	turquoise
ENSG00000137033.11	red
ENSG00000163377.14	yellow
ENSG00000115306.15	turquoise
ENSG00000168062.9	green
ENSG00000169660.15	turquoise
ENSG00000168404.12	green
ENSG00000241878.9	turquoise
ENSG00000248115.1	yellow
ENSG00000171163.15	turquoise
ENSG00000242861.1	turquoise
ENSG00000184254.16	black
ENSG00000230076.1	grey
ENSG00000058056.8	turquoise
ENSG00000136925.14	turquoise
ENSG00000142794.18	turquoise
ENSG00000088986.10	blue
ENSG00000216285.5	turquoise
ENSG00000175106.16	turquoise
ENSG00000151136.14	grey
ENSG00000153246.11	turquoise
ENSG00000157456.7	blue
ENSG00000164649.19	blue
ENSG00000245648.1	blue
ENSG00000105672.14	blue
ENSG00000223878.1	brown
ENSG00000154832.14	turquoise
ENSG00000162552.14	yellow
ENSG00000067900.6	turquoise
ENSG00000102898.11	blue
ENSG00000143845.14	grey
ENSG00000164010.13	turquoise
ENSG00000188549.12	brown
ENSG00000145217.13	turquoise
ENSG00000187824.8	turquoise
ENSG00000075826.16	brown
ENSG00000159674.11	black
ENSG00000065882.15	blue
ENSG00000236058.3	blue
ENSG00000235508.3	blue
ENSG00000198826.10	blue
ENSG00000152926.14	brown
ENSG00000156802.12	blue
ENSG00000110048.11	turquoise
ENSG00000105398.3	yellow
ENSG00000132837.14	brown
ENSG00000101230.5	yellow
ENSG00000066135.12	turquoise
ENSG00000170312.15	blue
ENSG00000100362.12	grey
ENSG00000145506.13	black
ENSG00000100364.18	turquoise
ENSG00000262001.1	turquoise
ENSG00000025772.7	blue
ENSG00000183426.15	brown
ENSG00000213906.9	turquoise
ENSG00000141682.11	green
ENSG00000171109.18	brown
ENSG00000131153.8	blue
ENSG00000243960.1	blue
ENSG00000165863.16	yellow
ENSG00000134690.10	blue
ENSG00000180211.5	turquoise
ENSG00000149489.8	turquoise
ENSG00000123342.15	black
ENSG00000173166.17	turquoise
ENSG00000129195.15	blue
ENSG00000156136.9	turquoise
ENSG00000225031.1	turquoise
ENSG00000051596.9	blue
ENSG00000185518.11	grey
ENSG00000151365.2	blue
ENSG00000255737.2	blue
ENSG00000160307.9	green
ENSG00000166803.10	blue
ENSG00000160326.13	yellow
ENSG00000111674.8	blue
ENSG00000197496.5	black
ENSG00000196204.11	blue
ENSG00000184925.11	grey
ENSG00000132965.9	green
ENSG00000187186.14	blue
ENSG00000184371.13	green
ENSG00000228532.4	turquoise
ENSG00000188895.11	turquoise
ENSG00000158985.13	turquoise
ENSG00000245532.5	brown
ENSG00000166669.13	grey
ENSG00000249437.7	brown
ENSG00000120549.15	brown
ENSG00000126903.15	brown
ENSG00000173621.8	blue
ENSG00000162817.6	yellow
ENSG00000279382.1	brown
ENSG00000242247.10	turquoise
ENSG00000185495.10	blue
ENSG00000163909.7	red
ENSG00000182022.17	green
ENSG00000141582.14	blue
ENSG00000002822.15	blue
ENSG00000148341.17	turquoise
ENSG00000108799.12	turquoise
ENSG00000257767.2	pink
ENSG00000227036.6	blue
ENSG00000218175.2	blue
ENSG00000239697.10	green
ENSG00000260923.5	turquoise
ENSG00000254585.2	turquoise
ENSG00000139438.5	yellow
ENSG00000233327.10	grey
ENSG00000104722.13	yellow
ENSG00000244538.1	turquoise
ENSG00000113368.11	blue
ENSG00000188921.13	green
ENSG00000178980.14	blue
ENSG00000168781.21	brown
ENSG00000078725.12	grey
ENSG00000070778.12	turquoise
ENSG00000232406.6	yellow
ENSG00000125633.10	turquoise
ENSG00000160097.15	turquoise
ENSG00000175854.11	blue
ENSG00000067842.17	green
ENSG00000077782.19	blue
ENSG00000110455.13	brown
ENSG00000267681.1	turquoise
ENSG00000260314.2	green
ENSG00000156711.16	turquoise
ENSG00000156453.13	red
ENSG00000158014.14	blue
ENSG00000177410.12	turquoise
ENSG00000170161.6	yellow
ENSG00000204348.9	turquoise
ENSG00000113140.10	blue
ENSG00000272405.1	turquoise
ENSG00000167280.16	turquoise
ENSG00000108474.16	brown
ENSG00000268565.1	pink
ENSG00000165507.8	green
ENSG00000235288.3	turquoise
ENSG00000115461.4	black
ENSG00000136147.16	turquoise
ENSG00000126883.16	blue
ENSG00000130175.9	blue
ENSG00000213719.8	blue
ENSG00000267855.5	yellow
ENSG00000167656.4	grey
ENSG00000112149.9	yellow
ENSG00000197930.12	blue
ENSG00000249242.7	brown
ENSG00000249087.6	turquoise
ENSG00000082438.15	turquoise
ENSG00000003756.16	turquoise
ENSG00000196705.8	turquoise
ENSG00000145555.14	turquoise
ENSG00000100767.15	turquoise
ENSG00000140968.10	green
ENSG00000145335.15	green
ENSG00000081307.12	turquoise
ENSG00000165695.9	green
ENSG00000229320.3	blue
ENSG00000144476.5	blue
ENSG00000260025.1	turquoise
ENSG00000279059.1	turquoise
ENSG00000013588.5	yellow
ENSG00000228242.6	turquoise
ENSG00000279088.1	brown
ENSG00000241484.9	blue
ENSG00000131015.4	blue
ENSG00000138821.12	turquoise
ENSG00000110002.15	brown
ENSG00000113790.10	turquoise
ENSG00000162882.14	green
ENSG00000114841.17	brown
ENSG00000175206.10	blue
ENSG00000244306.9	blue
ENSG00000260051.1	brown
ENSG00000103253.17	blue
ENSG00000217930.7	pink
ENSG00000146755.10	blue
ENSG00000272196.2	turquoise
ENSG00000182796.12	turquoise
ENSG00000125657.4	grey
ENSG00000110492.15	grey
ENSG00000139679.15	green
ENSG00000102924.11	grey
ENSG00000249307.5	black
ENSG00000172270.18	green
ENSG00000268043.7	turquoise
ENSG00000110315.6	turquoise
ENSG00000242732.4	brown
ENSG00000170074.19	brown
ENSG00000175197.10	turquoise
ENSG00000233476.3	turquoise
ENSG00000141480.17	green
ENSG00000129521.13	blue
ENSG00000164946.19	turquoise
ENSG00000110076.18	yellow
ENSG00000264558.1	turquoise
ENSG00000224712.10	turquoise
ENSG00000185619.17	turquoise
ENSG00000179284.5	green
ENSG00000136859.9	green
ENSG00000211751.7	green
ENSG00000099804.8	blue
ENSG00000137878.16	turquoise
ENSG00000215440.11	turquoise
ENSG00000115183.13	turquoise
ENSG00000226306.6	brown
ENSG00000135976.16	blue
ENSG00000185485.14	brown
ENSG00000142961.14	red
ENSG00000157827.19	turquoise
ENSG00000237649.7	blue
ENSG00000271430.1	brown
ENSG00000182916.7	black
ENSG00000229097.1	turquoise
ENSG00000067191.15	yellow
ENSG00000139910.19	grey
ENSG00000108797.11	turquoise
ENSG00000261114.1	turquoise
ENSG00000143228.12	blue
ENSG00000109084.13	yellow
ENSG00000108691.9	green
ENSG00000026036.20	brown
ENSG00000132840.9	red
ENSG00000153446.15	black
ENSG00000179627.9	turquoise
ENSG00000204623.8	turquoise
ENSG00000171316.11	red
ENSG00000153002.11	yellow
ENSG00000230979.3	blue
ENSG00000138180.15	blue
ENSG00000147383.10	yellow
ENSG00000019995.6	turquoise
ENSG00000186867.10	turquoise
ENSG00000181291.6	turquoise
ENSG00000273142.1	brown
ENSG00000200693.2	grey
ENSG00000267523.1	brown
ENSG00000232352.1	blue
ENSG00000158806.13	grey
ENSG00000140993.10	blue
ENSG00000148082.9	grey
ENSG00000131899.10	turquoise
ENSG00000276141.4	turquoise
ENSG00000140945.15	red
ENSG00000135437.9	turquoise
ENSG00000236144.6	turquoise
ENSG00000158019.20	turquoise
ENSG00000257524.5	turquoise
ENSG00000173267.13	blue
ENSG00000174939.10	blue
ENSG00000105122.12	green
ENSG00000163331.10	grey
ENSG00000143891.16	grey
ENSG00000230715.3	brown
ENSG00000177728.14	yellow
ENSG00000169926.9	turquoise
ENSG00000215790.6	turquoise
ENSG00000156113.20	blue
ENSG00000169679.14	blue
ENSG00000185090.14	blue
ENSG00000135679.21	pink
ENSG00000117069.14	grey
ENSG00000088836.12	turquoise
ENSG00000185164.14	blue
ENSG00000123416.15	blue
ENSG00000163513.17	red
ENSG00000277010.1	green
ENSG00000263155.5	turquoise
ENSG00000167306.18	turquoise
ENSG00000130513.6	grey
ENSG00000129219.13	turquoise
ENSG00000257315.1	turquoise
ENSG00000204381.11	red
ENSG00000105357.15	blue
ENSG00000188206.6	brown
ENSG00000135404.11	blue
ENSG00000077152.9	blue
ENSG00000196972.7	grey
ENSG00000258498.6	blue
ENSG00000178053.17	blue
ENSG00000213424.8	brown
ENSG00000111077.17	green
ENSG00000187260.15	green
ENSG00000181029.8	pink
ENSG00000052850.5	blue
ENSG00000235831.6	turquoise
ENSG00000100842.12	black
ENSG00000081923.10	turquoise
ENSG00000115602.16	black
ENSG00000172551.10	yellow
ENSG00000274512.4	grey
ENSG00000168016.13	turquoise
ENSG00000131389.16	turquoise
ENSG00000145708.10	green
ENSG00000189136.8	brown
ENSG00000095066.11	turquoise
ENSG00000079974.17	turquoise
ENSG00000145362.16	brown
ENSG00000182054.9	turquoise
ENSG00000152253.8	blue
ENSG00000140488.14	brown
ENSG00000042445.13	turquoise
ENSG00000155659.14	green
[truncated: 954 more rows]
