# Supplementary material for: Identification of four hub genes associated with adrenocortical carcinoma progression by WGCNA
Source: PeerJ. 2019 Mar 14;7:e6555. doi: 10.7717/peerj.6555 (PMC6421058; doi:10.7717/peerj.6555)
Supplement: Supplemental Information 6 [file peerj-07-6555-s006.xlsx]

## Sheet: Sheet1
Category	Term	Count	%	PValue	Genes	List Total	Pop Hits	Pop Total	Fold Enrichment	Bonferroni	Benjamini	FDR
KEGG_PATHWAY	hsa04110:Cell cycle	31	5.23649	2.7074328770701356E-19	E2F1, MAD1L1, PKMYT1, TTK, CHEK1, PTTG1, CCNE1, CDC45, CDKN2A, CDKN2C, CDKN2D, BUB1, ORC6, CCNA2, CDC6, CDK1, ESPL1, CDC20, MCM2, CDK4, CDC25C, MCM3, CDC25A, MCM5, MCM6, CCNB1, MAD2L1, CCNB2, PLK1, PCNA, BUB1B	215	124	6910	8.03488	5.712683370617986E-17	5.712683370617986E-17	3.4232221067578613E-16
KEGG_PATHWAY	hsa03030:DNA replication	11	1.85811	8.268052947178426E-8	PRIM1, POLE2, LIG1, POLD1, PCNA, MCM2, MCM3, RNASEH2A, MCM5, FEN1, MCM6	215	36	6910	9.82041	1.744544025594763E-5	8.722758171209044E-6	1.0453950023414649E-4
KEGG_PATHWAY	hsa04114:Oocyte meiosis	14	2.36486	2.8321825027503176E-5	CDK1, PKMYT1, CDC20, ESPL1, AURKA, PTTG1, CDC25C, CCNE1, REC8, MAD2L1, PLK1, BUB1, STAG3, CALM3	215	109	6910	4.12801	0.00595817	0.00199001	0.0358036
KEGG_PATHWAY	hsa04914:Progesterone-mediated oocyte maturation	11	1.85811	3.272900456077583E-4	CCNB1, CDK1, MAD1L1, MAD2L1, CCNB2, PLK1, BUB1, PKMYT1, CDC25C, CCNA2, CDC25A	215	87	6910	4.06362	0.0667382	0.0171191	0.413031
KEGG_PATHWAY	hsa05166:HTLV-I infection	19	3.20946	9.345794815628219E-4	E2F1, RAN, CHEK1, CDC20, PTTG1, MYBL1, FZD2, MYBL2, CDK4, VCAM1, MAD2L1, CDKN2A, POLE2, CDKN2C, POLD1, SLC2A1, PCNA, BUB1B, WNT6	215	256	6910	2.38536	0.179046	0.0386894	1.17525
KEGG_PATHWAY	hsa04115:p53 signaling pathway	9	1.52027	0.00100495	CCNB1, CCNE1, CDK1, CDKN2A, CCNB2, RRM2, CHEK1, CDK4, GTSE1	215	67	6910	4.31725	0.191158	0.0347408	1.26323
KEGG_PATHWAY	hsa03460:Fanconi anemia pathway	8	1.35135	0.00113659	FANCD2, FANCI, FAAP24, RMI2, FANCA, UBE2T, RAD51, TOP3B	215	53	6910	4.85125	0.213338	0.0336986	1.42761
KEGG_PATHWAY	hsa03410:Base excision repair	6	1.01351	0.00317947	POLE2, LIG1, POLD1, PCNA, SMUG1, FEN1	215	33	6910	5.84355	0.489281	0.0805614	3.94647
KEGG_PATHWAY	hsa03430:Mismatch repair	4	0.675676	0.0328614	EXO1, LIG1, POLD1, PCNA	215	23	6910	5.58948	0.999133	0.543131	34.4576
