# Supplementary material for: Identification of four hub genes associated with adrenocortical carcinoma progression by WGCNA
Source: PeerJ. 2019 Mar 14;7:e6555. doi: 10.7717/peerj.6555 (PMC6421058; doi:10.7717/peerj.6555)
Supplement: Supplemental Information 7 [file peerj-07-6555-s007.xlsx]

## Sheet: Sheet1
#node1	node2	node1_string_internal_id	node2_string_internal_id	node1_external_id	node2_external_id	neighborhood_on_chromosome	gene_fusion	phylogenetic_cooccurrence	homology	coexpression	experimentally_determined_interaction	database_annotated	automated_textmining	combined_score
CDC20	CCNB1	1849070	1844435	9606.ENSP00000308450	9606.ENSP00000256442	0	0	0	0	0.88	0.921	0.9	0.847	0.999
MCM3	CDC6	1843226	1842453	9606.ENSP00000229854	9606.ENSP00000209728	0	0	0	0	0.808	0.88	0.9	0.852	0.999
PCNA	FEN1	1856984	1848737	9606.ENSP00000368438	9606.ENSP00000305480	0	0	0	0	0.907	0.997	0.9	0.923	0.999
GINS1	GINS2	1845151	1844233	9606.ENSP00000262460	9606.ENSP00000253462	0	0	0	0	0.764	0.997	0.9	0.953	0.999
SMC4	NCAPH	1852454	1843566	9606.ENSP00000341382	9606.ENSP00000240423	0	0	0	0	0.804	0.974	0.9	0.781	0.999
CDC45	MCM5	1860553	1842548	9606.ENSP00000405726	9606.ENSP00000216122	0	0	0	0	0.94	0.956	0.9	0.893	0.999
CDK1	CKS2	1858283	1856383	9606.ENSP00000378699	9606.ENSP00000364976	0	0	0	0	0.906	0.991	0	0.786	0.999
CDC45	GINS2	1860553	1844233	9606.ENSP00000405726	9606.ENSP00000253462	0	0	0	0	0.891	0.947	0.9	0.542	0.999
POLD1	PCNA	1860575	1856984	9606.ENSP00000406046	9606.ENSP00000368438	0	0	0	0	0.292	0.942	0.9	0.861	0.999
CDK1	CCNB2	1858283	1847117	9606.ENSP00000378699	9606.ENSP00000288207	0	0	0	0	0.983	0.958	0.9	0.883	0.999
CDK1	CCNA2	1858283	1846354	9606.ENSP00000378699	9606.ENSP00000274026	0	0.01	0	0	0.903	0.955	0.9	0.808	0.999
CDC20	CCNA2	1849070	1846354	9606.ENSP00000308450	9606.ENSP00000274026	0	0	0	0	0.859	0.888	0.9	0.736	0.999
CKS2	CCNB1	1856383	1844435	9606.ENSP00000364976	9606.ENSP00000256442	0	0	0	0	0.84	0.992	0	0.635	0.999
SNRPB	SNRPF	1860980	1845900	9606.ENSP00000412566	9606.ENSP00000266735	0	0	0	0	0.687	0.945	0.9	0.839	0.999
MCM2	MCM3	1845676	1843226	9606.ENSP00000265056	9606.ENSP00000229854	0	0	0.221	0.759	0.967	0.989	0.9	0.887	0.999
AURKB	MAD2L1	1863844	1847745	9606.ENSP00000463999	9606.ENSP00000296509	0	0	0	0	0.843	0.894	0.9	0.704	0.999
NUF2	NDC80	1846198	1844946	9606.ENSP00000271452	9606.ENSP00000261597	0	0	0	0	0.886	0.997	0.9	0.964	0.999
CDC45	CDC6	1860553	1842453	9606.ENSP00000405726	9606.ENSP00000209728	0	0	0	0	0.828	0.668	0.9	0.889	0.999
DHFR	TYMS	1859928	1849803	9606.ENSP00000396308	9606.ENSP00000315644	0.309	0	0.51	0	0.412	0	0.941	0.959	0.999
CDK1	CDC20	1858283	1849070	9606.ENSP00000378699	9606.ENSP00000308450	0	0	0	0	0.889	0.779	0.9	0.909	0.999
CDC45	MCM3	1860553	1843226	9606.ENSP00000405726	9606.ENSP00000229854	0	0	0	0	0.871	0.989	0.9	0.893	0.999
MCM2	MCM5	1845676	1842548	9606.ENSP00000265056	9606.ENSP00000216122	0	0	0.308	0.798	0.967	0.989	0.9	0.912	0.999
SPC25	NDC80	1846768	1844946	9606.ENSP00000282074	9606.ENSP00000261597	0	0	0	0	0.663	0.806	0.9	0.9	0.999
RACGAP1	KIF23	1849236	1844781	9606.ENSP00000309871	9606.ENSP00000260363	0	0	0	0	0.824	0.953	0.9	0.92	0.999
CDC20	PLK1	1849070	1848135	9606.ENSP00000308450	9606.ENSP00000300093	0	0	0	0	0.952	0.419	0.9	0.889	0.999
MCM2	MCM6	1845676	1845487	9606.ENSP00000265056	9606.ENSP00000264156	0	0	0.39	0.773	0.967	0.992	0.9	0.845	0.999
HIST1H2BK	H2AFZ	1853439	1847723	9606.ENSP00000349430	9606.ENSP00000296417	0	0	0	0	0.739	0.966	0.9	0.533	0.999
CDT1	CDC6	1848231	1842453	9606.ENSP00000301019	9606.ENSP00000209728	0	0	0	0	0.967	0.797	0.9	0.949	0.999
AURKB	NDC80	1863844	1844946	9606.ENSP00000463999	9606.ENSP00000261597	0	0	0	0	0.861	0.504	0.9	0.877	0.999
CDC20	CCNB2	1849070	1847117	9606.ENSP00000308450	9606.ENSP00000288207	0	0	0	0	0.883	0.667	0.9	0.781	0.999
MCM2	GINS2	1845676	1844233	9606.ENSP00000265056	9606.ENSP00000253462	0	0	0	0	0.859	0.898	0.9	0.484	0.999
AURKB	BUB1	1863844	1848415	9606.ENSP00000463999	9606.ENSP00000302530	0	0	0	0	0.847	0.889	0.9	0.831	0.999
CDC20	MAD2L1	1849070	1847745	9606.ENSP00000308450	9606.ENSP00000296509	0	0	0	0	0.842	0.996	0.9	0.837	0.999
UBE2C	CDC20	1853360	1849070	9606.ENSP00000348838	9606.ENSP00000308450	0	0	0	0	0.844	0.884	0.9	0.618	0.999
CDC45	MCM6	1860553	1845487	9606.ENSP00000405726	9606.ENSP00000264156	0	0	0	0	0.794	0.988	0.9	0.819	0.999
PCNA	LIG1	1856984	1845325	9606.ENSP00000368438	9606.ENSP00000263274	0	0	0	0	0.546	0.988	0.9	0.918	0.999
AURKB	CDC20	1863844	1849070	9606.ENSP00000463999	9606.ENSP00000308450	0	0	0	0	0.9	0.36	0.9	0.878	0.999
AURKB	BUB1B	1863844	1847075	9606.ENSP00000463999	9606.ENSP00000287598	0	0	0	0	0.864	0.917	0.9	0.894	0.999
CDK1	BUB1B	1858283	1847075	9606.ENSP00000378699	9606.ENSP00000287598	0	0	0	0	0.858	0.667	0.9	0.844	0.999
BUB1	NDC80	1848415	1844946	9606.ENSP00000302530	9606.ENSP00000261597	0	0	0	0	0.93	0.85	0.9	0.731	0.999
BUB1	MAD2L1	1848415	1847745	9606.ENSP00000302530	9606.ENSP00000296509	0	0	0	0	0.879	0.97	0.9	0.819	0.999
RAN	NUTF2	1857999	1842726	9606.ENSP00000376176	9606.ENSP00000219169	0	0	0	0	0.204	0.945	0.9	0.852	0.999
CCNA2	CDC6	1846354	1842453	9606.ENSP00000274026	9606.ENSP00000209728	0	0	0	0	0.695	0.918	0.9	0.74	0.999
CDT1	GMNN	1848231	1843236	9606.ENSP00000301019	9606.ENSP00000230056	0	0	0	0	0.365	0.92	0.9	0.933	0.999
MAD2L1	MAD1L1	1847745	1845817	9606.ENSP00000296509	9606.ENSP00000265854	0	0	0	0	0.092	0.993	0.9	0.914	0.999
CDC20	BUB1B	1849070	1847075	9606.ENSP00000308450	9606.ENSP00000287598	0	0	0	0	0.818	0.995	0.9	0.942	0.999
MCM6	MCM3	1845487	1843226	9606.ENSP00000264156	9606.ENSP00000229854	0	0	0.299	0.756	0.971	0.97	0.9	0.868	0.999
FANCI	FANCD2	1849356	1847078	9606.ENSP00000310842	9606.ENSP00000287647	0	0	0	0	0.659	0.861	0.9	0.957	0.999
CDC20	BUB1	1849070	1848415	9606.ENSP00000308450	9606.ENSP00000302530	0	0	0	0	0.861	0.906	0.9	0.937	0.999
AURKB	CENPA	1863844	1851939	9606.ENSP00000463999	9606.ENSP00000336868	0	0	0	0	0.844	0.541	0.9	0.888	0.999
CDT1	MCM6	1848231	1845487	9606.ENSP00000301019	9606.ENSP00000264156	0	0	0	0	0.683	0.902	0.9	0.865	0.999
PSMC3IP	MND1	1858126	1843567	9606.ENSP00000377384	9606.ENSP00000240488	0	0	0	0	0.328	0.855	0.9	0.931	0.999
PLK1	CCNB1	1848135	1844435	9606.ENSP00000300093	9606.ENSP00000256442	0	0	0	0	0.928	0.66	0.9	0.93	0.999
MCM6	MCM5	1845487	1842548	9606.ENSP00000264156	9606.ENSP00000216122	0	0	0.37	0.771	0.969	0.989	0.9	0.862	0.999
MCM3	MCM5	1843226	1842548	9606.ENSP00000229854	9606.ENSP00000216122	0	0	0.438	0.761	0.965	0.99	0.9	0.937	0.999
SMC4	NCAPG	1852454	1844063	9606.ENSP00000341382	9606.ENSP00000251496	0	0	0	0	0.951	0.976	0.9	0.757	0.999
PTTG1	CDC20	1852874	1849070	9606.ENSP00000344936	9606.ENSP00000308450	0	0	0	0	0.86	0.774	0.9	0.866	0.999
NCAPG	NCAPH	1844063	1843566	9606.ENSP00000251496	9606.ENSP00000240423	0	0	0	0	0.849	0.971	0.9	0.855	0.999
CDC45	MCM2	1860553	1845676	9606.ENSP00000405726	9606.ENSP00000265056	0	0	0	0	0.828	0.968	0.9	0.925	0.999
CDK1	CDC25C	1858283	1850370	9606.ENSP00000378699	9606.ENSP00000321656	0	0	0	0	0.614	0.779	0.9	0.956	0.999
BUB1	BUB1B	1848415	1847075	9606.ENSP00000302530	9606.ENSP00000287598	0	0	0	0.619	0.869	0.989	0.9	0.887	0.999
CDK1	CKS1B	1858283	1849378	9606.ENSP00000378699	9606.ENSP00000311083	0	0	0	0	0.865	0.991	0	0.829	0.999
MCM5	CDC6	1842548	1842453	9606.ENSP00000216122	9606.ENSP00000209728	0	0	0	0	0.813	0.943	0.9	0.847	0.999
CDK1	CCNB1	1858283	1844435	9606.ENSP00000378699	9606.ENSP00000256442	0	0	0	0	0.982	0.991	0.9	0.97	0.999
BUB1	NUF2	1848415	1846198	9606.ENSP00000302530	9606.ENSP00000271452	0	0	0	0	0.87	0.834	0.9	0.726	0.999
MCM2	CDC6	1845676	1842453	9606.ENSP00000265056	9606.ENSP00000209728	0	0	0	0	0.582	0.957	0.9	0.923	0.999
TPX2	AURKA	1848175	1842628	9606.ENSP00000300403	9606.ENSP00000216911	0	0	0	0	0.887	0.958	0.9	0.788	0.999
MAD2L1	BUB1B	1847745	1847075	9606.ENSP00000296509	9606.ENSP00000287598	0	0	0	0	0.848	0.997	0.9	0.845	0.999
PCNA	EXO1	1856984	1849472	9606.ENSP00000368438	9606.ENSP00000311873	0	0	0	0	0.568	0.848	0.9	0.832	0.998
PLK1	CCNB2	1848135	1847117	9606.ENSP00000300093	9606.ENSP00000288207	0	0	0	0	0.934	0.171	0.9	0.737	0.998
CDC25C	CCNB1	1850370	1844435	9606.ENSP00000321656	9606.ENSP00000256442	0	0	0	0	0.658	0.445	0.9	0.944	0.998
CCNA2	CCNB1	1846354	1844435	9606.ENSP00000274026	9606.ENSP00000256442	0	0	0	0.762	0.987	0.873	0	0.871	0.998
CENPN	MLF1IP	1858091	1846726	9606.ENSP00000377007	9606.ENSP00000281453	0	0	0	0	0.612	0.774	0.9	0.821	0.998
ORC6	CDC6	1842721	1842453	9606.ENSP00000219097	9606.ENSP00000209728	0	0	0	0	0.518	0.855	0.9	0.792	0.998
TTK	BUB1	1855108	1848415	9606.ENSP00000358813	9606.ENSP00000302530	0	0	0	0	0.904	0.956	0	0.702	0.998
TTK	MAD2L1	1855108	1847745	9606.ENSP00000358813	9606.ENSP00000296509	0	0	0	0	0.894	0.956	0	0.722	0.998
FEN1	LIG1	1848737	1845325	9606.ENSP00000305480	9606.ENSP00000263274	0	0	0.29	0	0.543	0.606	0.9	0.886	0.998
SPC24	NDC80	1863909	1844946	9606.ENSP00000465075	9606.ENSP00000261597	0	0	0	0	0.32	0.774	0.9	0.919	0.998
MCM6	CDC6	1845487	1842453	9606.ENSP00000264156	9606.ENSP00000209728	0	0	0	0	0.621	0.813	0.9	0.823	0.998
CDK1	BUB1	1858283	1848415	9606.ENSP00000378699	9606.ENSP00000302530	0	0	0	0	0.891	0.612	0.9	0.733	0.998
SPC25	NUF2	1846768	1846198	9606.ENSP00000282074	9606.ENSP00000271452	0	0	0	0	0.352	0.806	0.9	0.895	0.998
BUB1B	MAD1L1	1847075	1845817	9606.ENSP00000287598	9606.ENSP00000265854	0	0	0	0	0.047	0.955	0.9	0.791	0.998
CDK1	CDC25A	1858283	1848560	9606.ENSP00000378699	9606.ENSP00000303706	0	0	0	0	0.364	0.779	0.9	0.9	0.998
SPC24	NUF2	1863909	1846198	9606.ENSP00000465075	9606.ENSP00000271452	0	0	0	0	0.261	0.774	0.9	0.946	0.998
AURKB	CDCA8	1863844	1849847	9606.ENSP00000463999	9606.ENSP00000316121	0	0	0	0	0.87	0.36	0.9	0.887	0.998
MLF1IP	CENPM	1846726	1842528	9606.ENSP00000281453	9606.ENSP00000215980	0	0	0	0	0.467	0.774	0.9	0.864	0.998
CDK1	MAD2L1	1858283	1847745	9606.ENSP00000378699	9606.ENSP00000296509	0	0	0	0	0.933	0.163	0.9	0.717	0.998
TTK	BUB1B	1855108	1847075	9606.ENSP00000358813	9606.ENSP00000287598	0	0	0	0	0.906	0.956	0	0.671	0.998
CHEK1	CDC25A	1859362	1848560	9606.ENSP00000388648	9606.ENSP00000303706	0	0	0	0	0.431	0.528	0.9	0.946	0.998
PRIM1	MCM5	1853600	1842548	9606.ENSP00000350491	9606.ENSP00000216122	0	0	0	0	0.962	0.074	0.9	0.576	0.998
CDT1	MCM2	1848231	1845676	9606.ENSP00000301019	9606.ENSP00000265056	0	0	0	0	0.821	0.501	0.9	0.861	0.998
PRIM1	MCM3	1853600	1843226	9606.ENSP00000350491	9606.ENSP00000229854	0	0	0	0	0.958	0.069	0.9	0.591	0.998
AURKB	KIF2C	1863844	1855643	9606.ENSP00000463999	9606.ENSP00000361298	0	0	0	0	0.844	0.116	0.9	0.904	0.998
HIST1H2BK	HIST1H2AE	1853439	1848523	9606.ENSP00000349430	9606.ENSP00000303373	0	0	0	0	0.887	0.878	0.8	0.502	0.998
CDKN2A	CDK4	1859838	1844551	9606.ENSP00000394932	9606.ENSP00000257904	0	0	0	0	0.054	0.694	0.9	0.956	0.998
CHEK1	CDC25C	1859362	1850370	9606.ENSP00000388648	9606.ENSP00000321656	0	0	0	0	0.448	0.528	0.9	0.956	0.998
BUB1	MAD1L1	1848415	1845817	9606.ENSP00000302530	9606.ENSP00000265854	0	0	0	0	0.088	0.956	0.9	0.676	0.998
THOC3	THOC1	1845690	1844947	9606.ENSP00000265097	9606.ENSP00000261600	0	0	0	0	0.12	0.833	0.9	0.857	0.997
AURKB	KIF20A	1863844	1858244	9606.ENSP00000463999	9606.ENSP00000378356	0	0	0	0	0.902	0.41	0.9	0.617	0.997
CENPH	MLF1IP	1846827	1846726	9606.ENSP00000283006	9606.ENSP00000281453	0	0	0	0	0.434	0.774	0.9	0.86	0.997
CDT1	CCNA2	1848231	1846354	9606.ENSP00000301019	9606.ENSP00000274026	0	0	0	0	0.827	0.774	0.9	0.366	0.997
PCNA	KIAA0101	1856984	1848123	9606.ENSP00000368438	9606.ENSP00000300035	0	0	0	0	0.744	0.774	0.9	0.602	0.997
NEK2	CDC20	1854493	1849070	9606.ENSP00000355966	9606.ENSP00000308450	0	0	0	0	0.777	0.774	0.9	0.496	0.997
NEK2	BUB1B	1854493	1847075	9606.ENSP00000355966	9606.ENSP00000287598	0	0	0	0	0.802	0.781	0.9	0.439	0.997
CDC20	AURKA	1849070	1842628	9606.ENSP00000308450	9606.ENSP00000216911	0	0	0	0	0.89	0.36	0.9	0.699	0.997
HJURP	CENPA	1861060	1851939	9606.ENSP00000414109	9606.ENSP00000336868	0	0	0	0	0.829	0.36	0.9	0.836	0.997
ZWINT	BUB1B	1856020	1847075	9606.ENSP00000363055	9606.ENSP00000287598	0	0	0	0	0.808	0.774	0.9	0.44	0.997
BUB1	PLK1	1848415	1848135	9606.ENSP00000302530	9606.ENSP00000300093	0	0	0	0	0.743	0.527	0.9	0.814	0.997
ZWINT	NDC80	1856020	1844946	9606.ENSP00000363055	9606.ENSP00000261597	0	0	0	0	0.738	0.774	0.9	0.614	0.997
CHEK1	RAD51	1859362	1857551	9606.ENSP00000388648	9606.ENSP00000372088	0	0	0	0	0.654	0.41	0.9	0.907	0.997
AURKB	CCNB2	1863844	1847117	9606.ENSP00000463999	9606.ENSP00000288207	0	0	0	0	0.914	0.17	0.9	0.661	0.997
BUB1B	NDC80	1847075	1844946	9606.ENSP00000287598	9606.ENSP00000261597	0	0	0	0	0.903	0.16	0.9	0.69	0.997
CDC45	CHEK1	1860553	1859362	9606.ENSP00000405726	9606.ENSP00000388648	0	0	0	0	0.857	0.362	0.9	0.804	0.997
CDC25C	PLK1	1850370	1848135	9606.ENSP00000321656	9606.ENSP00000300093	0	0	0	0	0.537	0.412	0.9	0.918	0.997
AURKB	CCNB1	1863844	1844435	9606.ENSP00000463999	9606.ENSP00000256442	0	0	0	0	0.864	0.17	0.9	0.792	0.997
PKMYT1	CCNB1	1845109	1844435	9606.ENSP00000262300	9606.ENSP00000256442	0	0	0	0	0.412	0.86	0.9	0.693	0.997
KIF11	KIF23	1844817	1844781	9606.ENSP00000260731	9606.ENSP00000260363	0	0	0	0.624	0.969	0	0.9	0.681	0.997
NEK2	MAD2L1	1854493	1847745	9606.ENSP00000355966	9606.ENSP00000296509	0	0	0	0	0.812	0.827	0.9	0.294	0.997
SNRPF	LSM7	1845900	1844145	9606.ENSP00000266735	9606.ENSP00000252622	0	0	0	0	0.697	0.871	0.9	0.39	0.997
MAD2L1	CCNB1	1847745	1844435	9606.ENSP00000296509	9606.ENSP00000256442	0	0	0	0	0.92	0.099	0.9	0.698	0.997
MAD2L1	NDC80	1847745	1844946	9606.ENSP00000296509	9606.ENSP00000261597	0	0	0	0	0.886	0.564	0.9	0.582	0.997
RACGAP1	ECT2	1849236	1843313	9606.ENSP00000309871	9606.ENSP00000232458	0	0	0	0	0.814	0.36	0.9	0.842	0.997
SPC24	SPC25	1863909	1846768	9606.ENSP00000465075	9606.ENSP00000282074	0	0	0	0	0.13	0.774	0.9	0.866	0.997
CDK1	AURKA	1858283	1842628	9606.ENSP00000378699	9606.ENSP00000216911	0	0	0.431	0.776	0.947	0.185	0.9	0.742	0.996
CDT1	MCM5	1848231	1842548	9606.ENSP00000301019	9606.ENSP00000216122	0	0	0	0	0.838	0.293	0.9	0.727	0.996
KIF20A	RACGAP1	1858244	1849236	9606.ENSP00000378356	9606.ENSP00000309871	0	0	0	0	0.829	0.524	0.9	0.625	0.996
CENPN	CENPA	1858091	1851939	9606.ENSP00000377007	9606.ENSP00000336868	0	0	0	0	0.742	0.194	0.9	0.838	0.996
KIF20A	KIF11	1858244	1844817	9606.ENSP00000378356	9606.ENSP00000260731	0	0	0	0.633	0.959	0	0.9	0.62	0.996
MAD2L1	CCNB2	1847745	1847117	9606.ENSP00000296509	9606.ENSP00000288207	0	0	0	0	0.892	0.099	0.9	0.684	0.996
PLK1	ESPL1	1848135	1844556	9606.ENSP00000300093	9606.ENSP00000257934	0	0	0	0	0.494	0.667	0.9	0.802	0.996
AURKB	KIF23	1863844	1844781	9606.ENSP00000463999	9606.ENSP00000260363	0	0	0	0	0.749	0.116	0.9	0.86	0.996
MAD2L1	CCNA2	1847745	1846354	9606.ENSP00000296509	9606.ENSP00000274026	0	0	0	0	0.895	0.395	0.9	0.544	0.996
BUB1	AURKA	1848415	1842628	9606.ENSP00000302530	9606.ENSP00000216911	0	0	0	0	0.899	0.889	0	0.729	0.996
AURKB	UBE2C	1863844	1853360	9606.ENSP00000463999	9606.ENSP00000348838	0	0	0	0	0.941	0	0.9	0.382	0.996
CENPA	AURKA	1851939	1842628	9606.ENSP00000336868	9606.ENSP00000216911	0	0	0	0	0.85	0.313	0.9	0.707	0.996
UBE2C	AURKA	1853360	1842628	9606.ENSP00000348838	9606.ENSP00000216911	0	0	0	0	0.953	0	0.9	0.379	0.996
CENPA	BUB1	1851939	1848415	9606.ENSP00000336868	9606.ENSP00000302530	0	0	0	0	0.872	0.071	0.9	0.723	0.996
CDKN2C	CDK4	1845196	1844551	9606.ENSP00000262662	9606.ENSP00000257904	0	0	0	0	0.054	0.804	0.9	0.851	0.996
AURKB	CDK1	1863844	1858283	9606.ENSP00000463999	9606.ENSP00000378699	0	0	0.461	0.725	0.915	0.392	0.9	0.827	0.996
PTTG1	AURKA	1852874	1842628	9606.ENSP00000344936	9606.ENSP00000216911	0	0	0	0	0.874	0.324	0.9	0.639	0.996
DLGAP5	AURKA	1843859	1842628	9606.ENSP00000247191	9606.ENSP00000216911	0	0	0	0	0.891	0.503	0.9	0.435	0.996
CDK1	RRM2	1858283	1854033	9606.ENSP00000378699	9606.ENSP00000353770	0	0	0	0	0.993	0.36	0	0.35	0.996
SNRPB	LSM7	1860980	1844145	9606.ENSP00000412566	9606.ENSP00000252622	0	0	0	0	0.234	0.925	0.9	0.508	0.996
CDC45	ORC6	1860553	1842721	9606.ENSP00000405726	9606.ENSP00000219097	0	0	0	0	0.431	0.868	0.9	0.618	0.996
CDC45	POLE2	1860553	1842589	9606.ENSP00000405726	9606.ENSP00000216367	0	0	0	0	0.813	0.678	0.9	0.475	0.996
KIF2C	BUB1	1855643	1848415	9606.ENSP00000361298	9606.ENSP00000302530	0	0	0	0	0.878	0.197	0.9	0.711	0.996
MAD2L1	AURKA	1847745	1842628	9606.ENSP00000296509	9606.ENSP00000216911	0	0	0	0	0.909	0.894	0	0.677	0.996
CENPP	MLF1IP	1856335	1846726	9606.ENSP00000364737	9606.ENSP00000281453	0	0	0	0	0.098	0.774	0.9	0.86	0.996
CDK1	NDC80	1858283	1844946	9606.ENSP00000378699	9606.ENSP00000261597	0	0	0	0	0.914	0	0.9	0.595	0.996
CCNB2	CCNA2	1847117	1846354	9606.ENSP00000288207	9606.ENSP00000274026	0	0	0	0.765	0.988	0.673	0	0.849	0.996
CCNB2	CCNB1	1847117	1844435	9606.ENSP00000288207	9606.ENSP00000256442	0	0	0	0.953	0.846	0.774	0.9	0.711	0.996
KIF23	ECT2	1844781	1843313	9606.ENSP00000260363	9606.ENSP00000232458	0	0	0	0	0.746	0.285	0.9	0.763	0.995
CHEK1	MCM2	1859362	1845676	9606.ENSP00000388648	9606.ENSP00000265056	0	0	0	0	0.743	0.503	0.9	0.658	0.995
CENPN	CENPM	1858091	1842528	9606.ENSP00000377007	9606.ENSP00000215980	0	0	0	0	0.629	0.133	0.9	0.862	0.995
CDK1	FOXM1	1858283	1852579	9606.ENSP00000378699	9606.ENSP00000342307	0	0	0	0	0.813	0.416	0.9	0.626	0.995
PRIM1	POLE2	1853600	1842589	9606.ENSP00000350491	9606.ENSP00000216367	0	0	0	0	0.92	0	0.9	0.505	0.995
PLK1	BUB1B	1848135	1847075	9606.ENSP00000300093	9606.ENSP00000287598	0	0	0	0	0.613	0.36	0.9	0.843	0.995
GINS2	MCM5	1844233	1842548	9606.ENSP00000253462	9606.ENSP00000216122	0	0	0	0	0.824	0.69	0.9	0.333	0.995
CDK1	PCNA	1858283	1856984	9606.ENSP00000378699	9606.ENSP00000368438	0	0	0	0	0.938	0.402	0	0.879	0.995
ORC6	MCM5	1842721	1842548	9606.ENSP00000219097	9606.ENSP00000216122	0	0	0	0	0.396	0.876	0.9	0.443	0.995
CDK1	CENPA	1858283	1851939	9606.ENSP00000378699	9606.ENSP00000336868	0	0	0	0	0.838	0.117	0.9	0.713	0.995
CKS1B	CCNB1	1849378	1844435	9606.ENSP00000311083	9606.ENSP00000256442	0	0	0	0	0.697	0.962	0	0.661	0.995
HMMR	TPX2	1858139	1848175	9606.ENSP00000377492	9606.ENSP00000300403	0	0	0	0	0.839	0.36	0.9	0.603	0.995
HIST1H2BK	CENPA	1853439	1851939	9606.ENSP00000349430	9606.ENSP00000336868	0	0	0	0	0.268	0.887	0.9	0.507	0.995
TTK	MAD1L1	1855108	1845817	9606.ENSP00000358813	9606.ENSP00000265854	0	0	0	0	0.086	0.956	0.8	0.549	0.995
CDK1	TPX2	1858283	1848175	9606.ENSP00000378699	9606.ENSP00000300403	0	0	0	0	0.879	0	0.9	0.633	0.995
CDC20	ESPL1	1849070	1844556	9606.ENSP00000308450	9606.ENSP00000257934	0	0	0	0	0.653	0.41	0.9	0.822	0.995
PRIM1	MCM2	1853600	1845676	9606.ENSP00000350491	9606.ENSP00000265056	0	0	0	0	0.887	0.095	0.9	0.606	0.995
MAD2L1	NUF2	1847745	1846198	9606.ENSP00000296509	9606.ENSP00000271452	0	0	0	0	0.883	0.293	0.9	0.476	0.995
CDK1	NCAPG	1858283	1844063	9606.ENSP00000378699	9606.ENSP00000251496	0	0	0	0	0.92	0.327	0.9	0.179	0.995
CDCA8	CDC20	1849847	1849070	9606.ENSP00000316121	9606.ENSP00000308450	0	0	0	0	0.917	0	0.9	0.523	0.995
CDC45	GINS1	1860553	1845151	9606.ENSP00000405726	9606.ENSP00000262460	0	0	0	0	0.476	0.69	0.9	0.755	0.995
RAD51	EXO1	1857551	1849472	9606.ENSP00000372088	9606.ENSP00000311873	0.073	0	0	0	0.663	0.307	0.9	0.838	0.995
KIF20A	PLK1	1858244	1848135	9606.ENSP00000378356	9606.ENSP00000300093	0	0	0	0	0.82	0	0.9	0.775	0.995
NDC80	CCNB1	1844946	1844435	9606.ENSP00000261597	9606.ENSP00000256442	0	0	0	0	0.863	0.503	0.9	0.442	0.995
MCM2	GINS1	1845676	1845151	9606.ENSP00000265056	9606.ENSP00000262460	0	0	0	0	0.322	0.69	0.9	0.791	0.995
TOP2A	PCNA	1860923	1856984	9606.ENSP00000411532	9606.ENSP00000368438	0.505	0	0	0	0.703	0.071	0.9	0.711	0.995
CDC25A	CCNB1	1848560	1844435	9606.ENSP00000303706	9606.ENSP00000256442	0	0	0	0	0.405	0.677	0.9	0.808	0.995
CDK1	PKMYT1	1858283	1845109	9606.ENSP00000378699	9606.ENSP00000262300	0	0	0	0.703	0.317	0.923	0.9	0.833	0.995
CDK1	CDCA8	1858283	1849847	9606.ENSP00000378699	9606.ENSP00000316121	0	0	0	0	0.879	0	0.9	0.624	0.995
NDUFA13	NDUFA12	1861604	1851281	9606.ENSP00000423673	9606.ENSP00000330737	0	0	0	0	0.714	0.773	0.9	0.44	0.995
FOXM1	CCNB1	1852579	1844435	9606.ENSP00000342307	9606.ENSP00000256442	0	0	0	0	0.771	0.365	0.9	0.75	0.995
H2AFY2	HIST1H2BK	1855864	1853439	9606.ENSP00000362352	9606.ENSP00000349430	0	0	0	0	0.859	0.676	0.8	0.54	0.995
CDK1	CDC6	1858283	1842453	9606.ENSP00000378699	9606.ENSP00000209728	0	0	0	0	0.692	0.905	0	0.844	0.995
CCNA2	PKMYT1	1846354	1845109	9606.ENSP00000274026	9606.ENSP00000262300	0	0	0	0	0.507	0.813	0.9	0.548	0.995
KIF2C	PLK1	1855643	1848135	9606.ENSP00000361298	9606.ENSP00000300093	0	0	0	0	0.756	0.36	0.9	0.721	0.995
ZWINT	BUB1	1856020	1848415	9606.ENSP00000363055	9606.ENSP00000302530	0	0	0	0	0.656	0.774	0.9	0.396	0.994
CDK4	CCNB1	1844551	1844435	9606.ENSP00000257904	9606.ENSP00000256442	0	0	0	0	0.298	0.521	0.9	0.85	0.994
CENPA	NDC80	1851939	1844946	9606.ENSP00000336868	9606.ENSP00000261597	0	0	0	0	0.801	0.169	0.9	0.716	0.994
CDCA8	CCNB1	1849847	1844435	9606.ENSP00000316121	9606.ENSP00000256442	0	0	0	0	0.868	0	0.9	0.594	0.994
CCNE1	CDK4	1845190	1844551	9606.ENSP00000262643	9606.ENSP00000257904	0	0	0	0	0.1	0.594	0.9	0.866	0.994
CDK1	PLK1	1858283	1848135	9606.ENSP00000378699	9606.ENSP00000300093	0	0	0	0.669	0.838	0.526	0.9	0.933	0.994
UBE2C	BUB1B	1853360	1847075	9606.ENSP00000348838	9606.ENSP00000287598	0	0	0	0	0.857	0.324	0.9	0.464	0.994
COX6B1	COX6A1	1843826	1843204	9606.ENSP00000246554	9606.ENSP00000229379	0	0	0	0	0.812	0.43	0.9	0.566	0.994
OAS1	ISG15	1859322	1857024	9606.ENSP00000388001	9606.ENSP00000368699	0	0	0	0	0.857	0	0.9	0.658	0.994
BUB1	CCNB1	1848415	1844435	9606.ENSP00000302530	9606.ENSP00000256442	0	0	0	0	0.865	0.095	0.9	0.632	0.994
CDC20	NDC80	1849070	1844946	9606.ENSP00000308450	9606.ENSP00000261597	0	0	0	0	0.862	0	0.9	0.632	0.994
PCNA	PRIM1	1856984	1853600	9606.ENSP00000368438	9606.ENSP00000350491	0.309	0	0	0	0.87	0	0.9	0.506	0.994
BUB1B	AURKA	1847075	1842628	9606.ENSP00000287598	9606.ENSP00000216911	0	0	0	0	0.864	0.89	0	0.675	0.994
BUB1	CCNB2	1848415	1847117	9606.ENSP00000302530	9606.ENSP00000288207	0	0	0	0	0.891	0.095	0.9	0.516	0.994
AURKB	RACGAP1	1863844	1849236	9606.ENSP00000463999	9606.ENSP00000309871	0	0	0	0	0.694	0.36	0.9	0.753	0.994
CCNB2	PKMYT1	1847117	1845109	9606.ENSP00000288207	9606.ENSP00000262300	0	0	0	0	0.542	0.703	0.9	0.64	0.994
PTTG1	ESPL1	1852874	1844556	9606.ENSP00000344936	9606.ENSP00000257934	0	0	0	0	0.326	0.774	0.9	0.705	0.994
PLK1	AURKA	1848135	1842628	9606.ENSP00000300093	9606.ENSP00000216911	0	0	0	0.765	0.773	0.694	0.9	0.873	0.994
ISG15	IFI6	1857024	1852601	9606.ENSP00000368699	9606.ENSP00000342513	0	0	0	0	0.892	0	0.9	0.537	0.994
BUB1B	ESPL1	1847075	1844556	9606.ENSP00000287598	9606.ENSP00000257934	0	0	0	0	0.82	0	0.9	0.695	0.994
BUB1B	CCNB1	1847075	1844435	9606.ENSP00000287598	9606.ENSP00000256442	0	0	0	0	0.856	0.047	0.9	0.663	0.994
AURKB	MAD1L1	1863844	1845817	9606.ENSP00000463999	9606.ENSP00000265854	0	0	0	0	0.054	0.889	0.9	0.507	0.994
CENPA	CENPM	1851939	1842528	9606.ENSP00000336868	9606.ENSP00000215980	0	0	0	0	0.766	0.194	0.9	0.759	0.994
CDT1	MCM3	1848231	1843226	9606.ENSP00000301019	9606.ENSP00000229854	0	0	0	0	0.673	0.293	0.9	0.788	0.994
PLK1	CCNA2	1848135	1846354	9606.ENSP00000300093	9606.ENSP00000274026	0	0	0	0	0.961	0.543	0	0.71	0.994
CDK1	KIF11	1858283	1844817	9606.ENSP00000378699	9606.ENSP00000260731	0	0	0	0	0.917	0.422	0	0.885	0.994
MCM6	GINS2	1845487	1844233	9606.ENSP00000264156	9606.ENSP00000253462	0	0	0	0	0.773	0.63	0.9	0.398	0.994
CDT1	ORC6	1848231	1842721	9606.ENSP00000301019	9606.ENSP00000219097	0	0	0	0	0.28	0.36	0.9	0.898	0.994
GINS1	MCM3	1845151	1843226	9606.ENSP00000262460	9606.ENSP00000229854	0	0	0	0	0.499	0.69	0.9	0.615	0.993
CDC25C	CCNB2	1850370	1847117	9606.ENSP00000321656	9606.ENSP00000288207	0	0	0	0	0.709	0.169	0.9	0.78	0.993
CKS2	CCNA2	1856383	1846354	9606.ENSP00000364976	9606.ENSP00000274026	0	0	0	0	0.806	0.924	0	0.621	0.993
SNRNP70	SNRPF	1864888	1845900	9606.ENSP00000472998	9606.ENSP00000266735	0	0	0	0	0.054	0.891	0.9	0.483	0.993
AURKB	ESPL1	1863844	1844556	9606.ENSP00000463999	9606.ENSP00000257934	0	0	0	0	0.654	0	0.9	0.819	0.993
CDC20	UBE2S	1849070	1845564	9606.ENSP00000308450	9606.ENSP00000264552	0	0	0	0	0.458	0.807	0.9	0.429	0.993
CDC25C	PKMYT1	1850370	1845109	9606.ENSP00000321656	9606.ENSP00000262300	0	0	0	0	0.286	0.695	0.9	0.731	0.993
ENO2	GAPDH	1843192	1843185	9606.ENSP00000229277	9606.ENSP00000229239	0.309	0	0	0	0.941	0.499	0.17	0.659	0.993
BUB1B	CCNA2	1847075	1846354	9606.ENSP00000287598	9606.ENSP00000274026	0	0	0	0	0.847	0.361	0.9	0.447	0.993
PCNA	CDK4	1856984	1844551	9606.ENSP00000368438	9606.ENSP00000257904	0	0	0	0	0.394	0.429	0.9	0.824	0.993
CDCA8	BUB1	1849847	1848415	9606.ENSP00000316121	9606.ENSP00000302530	0	0	0	0	0.857	0	0.9	0.575	0.993
RACGAP1	KIF11	1849236	1844817	9606.ENSP00000309871	9606.ENSP00000260731	0	0	0	0	0.893	0.181	0.9	0.305	0.993
MLF1IP	CENPK	1846726	1843648	9606.ENSP00000281453	9606.ENSP00000242872	0	0	0	0	0.44	0.774	0.9	0.537	0.993
KIF2C	CDC20	1855643	1849070	9606.ENSP00000361298	9606.ENSP00000308450	0	0	0	0	0.868	0.11	0.9	0.507	0.993
GINS1	MCM5	1845151	1842548	9606.ENSP00000262460	9606.ENSP00000216122	0	0	0	0	0.491	0.69	0.9	0.615	0.993
ISG15	OASL	1857024	1844517	9606.ENSP00000368699	9606.ENSP00000257570	0	0	0	0	0.885	0	0.9	0.49	0.993
CCNF	CDC20	1858453	1849070	9606.ENSP00000380256	9606.ENSP00000308450	0	0	0	0	0.693	0.51	0.9	0.637	0.993
KIF2C	CDCA8	1855643	1849847	9606.ENSP00000361298	9606.ENSP00000316121	0	0	0	0	0.875	0.145	0.9	0.501	0.993
PLK1	KIF23	1848135	1844781	9606.ENSP00000300093	9606.ENSP00000260363	0	0	0	0	0.672	0.36	0.9	0.707	0.993
PRIM1	MCM6	1853600	1845487	9606.ENSP00000350491	9606.ENSP00000264156	0	0	0	0	0.866	0.069	0.9	0.544	0.993
RAD51	PCNA	1857551	1856984	9606.ENSP00000372088	9606.ENSP00000368438	0.048	0	0	0	0.489	0.508	0.9	0.78	0.993
KIF2C	CENPA	1855643	1851939	9606.ENSP00000361298	9606.ENSP00000336868	0	0	0	0	0.84	0.096	0.9	0.617	0.993
CDC20	MAD1L1	1849070	1845817	9606.ENSP00000308450	9606.ENSP00000265854	0	0	0	0	0.055	0.797	0.9	0.686	0.993
UBE2C	MAD2L1	1853360	1847745	9606.ENSP00000348838	9606.ENSP00000296509	0	0	0	0	0.837	0.424	0.9	0.338	0.992
CENPH	CENPK	1846827	1843648	9606.ENSP00000283006	9606.ENSP00000242872	0	0	0	0	0.51	0.401	0.9	0.76	0.992
ISG15	IFI27	1857024	1848004	9606.ENSP00000368699	9606.ENSP00000298902	0	0	0	0	0.831	0	0.9	0.574	0.992
ZWINT	NUF2	1856020	1846198	9606.ENSP00000363055	9606.ENSP00000271452	0	0	0	0	0.443	0.774	0.9	0.439	0.992
PCNA	MCM2	1856984	1845676	9606.ENSP00000368438	9606.ENSP00000265056	0	0	0	0	0.97	0	0	0.754	0.992
KIF20A	CDCA8	1858244	1849847	9606.ENSP00000378356	9606.ENSP00000316121	0	0	0	0	0.85	0.16	0.9	0.439	0.992
TTK	NDC80	1855108	1844946	9606.ENSP00000358813	9606.ENSP00000261597	0	0	0	0	0.974	0.473	0	0.517	0.992
PLK1	MAD2L1	1848135	1847745	9606.ENSP00000300093	9606.ENSP00000296509	0	0	0	0	0.768	0.172	0.9	0.649	0.992
PCNA	MCM3	1856984	1843226	9606.ENSP00000368438	9606.ENSP00000229854	0	0	0	0	0.972	0	0	0.738	0.992
TOP2A	BUB1B	1860923	1847075	9606.ENSP00000411532	9606.ENSP00000287598	0	0	0	0	0.988	0	0	0.366	0.992
UBE2C	PTTG1	1853360	1852874	9606.ENSP00000348838	9606.ENSP00000344936	0	0	0	0	0.867	0	0.9	0.504	0.992
CHEK1	CDC6	1859362	1842453	9606.ENSP00000388648	9606.ENSP00000209728	0	0	0	0	0.692	0.139	0.9	0.743	0.992
PCNA	CDC6	1856984	1842453	9606.ENSP00000368438	9606.ENSP00000209728	0	0	0	0	0.521	0.285	0.9	0.807	0.992
RAD51	RAD51AP1	1857551	1843165	9606.ENSP00000372088	9606.ENSP00000228843	0	0	0	0	0.496	0.407	0.9	0.785	0.992
ISG15	ISG20	1857024	1848861	9606.ENSP00000368699	9606.ENSP00000306565	0	0	0	0	0.592	0	0.9	0.826	0.992
CCNB2	NDC80	1847117	1844946	9606.ENSP00000288207	9606.ENSP00000261597	0	0	0	0	0.828	0	0.9	0.603	0.992
HMMR	AURKA	1858139	1842628	9606.ENSP00000377492	9606.ENSP00000216911	0	0	0	0	0.836	0.336	0.9	0.375	0.992
ISG15	OAS3	1857024	1843172	9606.ENSP00000368699	9606.ENSP00000228928	0	0	0	0	0.878	0	0.9	0.45	0.992
UBE2C	CCNB1	1853360	1844435	9606.ENSP00000348838	9606.ENSP00000256442	0	0	0	0	0.866	0	0.9	0.469	0.992
DTL	CDT1	1854490	1848231	9606.ENSP00000355958	9606.ENSP00000301019	0	0	0	0	0.876	0.36	0	0.914	0.992
CENPA	MLF1IP	1851939	1846726	9606.ENSP00000336868	9606.ENSP00000281453	0	0	0	0	0.613	0.329	0.9	0.759	0.992
CDCA8	BUB1B	1849847	1847075	9606.ENSP00000316121	9606.ENSP00000287598	0	0	0	0	0.823	0	0.9	0.572	0.991
KIF2C	BUB1B	1855643	1847075	9606.ENSP00000361298	9606.ENSP00000287598	0	0	0	0	0.813	0.178	0.9	0.519	0.991
CHEK1	EXO1	1859362	1849472	9606.ENSP00000388648	9606.ENSP00000311873	0	0	0	0	0.737	0.176	0.9	0.642	0.991
GINS2	MCM3	1844233	1843226	9606.ENSP00000253462	9606.ENSP00000229854	0	0	0	0	0.729	0.69	0.9	0.155	0.991
MCM2	ASF1B	1845676	1845347	9606.ENSP00000265056	9606.ENSP00000263382	0	0	0	0	0.695	0.9	0	0.745	0.991
FOXM1	PLK1	1852579	1848135	9606.ENSP00000342307	9606.ENSP00000300093	0	0	0	0	0.695	0.1	0.9	0.711	0.991
STAG3	REC8	1850137	1849097	9606.ENSP00000319318	9606.ENSP00000308699	0	0	0	0	0.464	0.676	0.9	0.546	0.991
POLD1	LIG1	1860575	1845325	9606.ENSP00000406046	9606.ENSP00000263274	0	0	0	0	0.651	0.121	0.9	0.763	0.991
SNRNP70	SNRPB	1864888	1860980	9606.ENSP00000472998	9606.ENSP00000412566	0	0	0	0	0.1	0.777	0.9	0.637	0.991
FANCA	FANCD2	1857814	1847078	9606.ENSP00000373952	9606.ENSP00000287647	0	0	0	0	0.138	0	0.9	0.908	0.991
NDC80	ESPL1	1844946	1844556	9606.ENSP00000261597	9606.ENSP00000257934	0	0	0	0	0.791	0	0.9	0.621	0.991
BUB1	KIF11	1848415	1844817	9606.ENSP00000302530	9606.ENSP00000260731	0	0	0	0	0.974	0.197	0	0.609	0.991
PCNA	RRM2	1856984	1854033	9606.ENSP00000368438	9606.ENSP00000353770	0	0	0	0	0.984	0.053	0	0.475	0.991
CCNA2	MCM2	1846354	1845676	9606.ENSP00000274026	9606.ENSP00000265056	0	0	0	0	0.789	0.182	0.9	0.57	0.991
CENPA	BUB1B	1851939	1847075	9606.ENSP00000336868	9606.ENSP00000287598	0	0	0	0	0.781	0.172	0.9	0.591	0.991
PCNA	DTL	1856984	1854490	9606.ENSP00000368438	9606.ENSP00000355958	0	0	0	0	0.634	0.36	0.9	0.67	0.991
UBE2C	CCNA2	1853360	1846354	9606.ENSP00000348838	9606.ENSP00000274026	0	0	0	0	0.872	0	0.9	0.386	0.991
CENPA	MAD2L1	1851939	1847745	9606.ENSP00000336868	9606.ENSP00000296509	0	0	0	0	0.825	0.099	0.9	0.55	0.991
CKS2	CCNB2	1856383	1847117	9606.ENSP00000364976	9606.ENSP00000288207	0	0	0	0	0.798	0.893	0	0.623	0.991
BUB1	ESPL1	1848415	1844556	9606.ENSP00000302530	9606.ENSP00000257934	0	0	0	0	0.676	0	0.9	0.746	0.991
MCM6	GMNN	1845487	1843236	9606.ENSP00000264156	9606.ENSP00000230056	0	0	0	0	0.655	0.595	0.9	0.454	0.991
CDK1	PRC1	1858283	1858173	9606.ENSP00000378699	9606.ENSP00000377793	0	0	0	0	0.88	0.777	0	0.692	0.991
PCNA	CCNE1	1856984	1845190	9606.ENSP00000368438	9606.ENSP00000262643	0	0	0	0	0.207	0.774	0.9	0.567	0.991
NDUFA1	NDUFA12	1855481	1851281	9606.ENSP00000360492	9606.ENSP00000330737	0	0	0	0	0.353	0.667	0.9	0.66	0.991
KIF20A	KIF4A	1858244	1856112	9606.ENSP00000378356	9606.ENSP00000363524	0	0	0	0.627	0.854	0.169	0.9	0.735	0.99
CDK1	SMC4	1858283	1852454	9606.ENSP00000378699	9606.ENSP00000341382	0	0	0	0	0.753	0.547	0.9	0.239	0.99
CDC45	PRIM1	1860553	1853600	9606.ENSP00000405726	9606.ENSP00000350491	0	0	0	0	0.889	0	0.9	0.244	0.99
AURKB	PTTG1	1863844	1852874	9606.ENSP00000463999	9606.ENSP00000344936	0	0	0	0	0.789	0	0.9	0.587	0.99
SPC24	BUB1	1863909	1848415	9606.ENSP00000465075	9606.ENSP00000302530	0	0	0	0	0.261	0.774	0.9	0.502	0.99
CDCA8	PLK1	1849847	1848135	9606.ENSP00000316121	9606.ENSP00000300093	0	0	0	0	0.822	0	0.9	0.524	0.99
CDC25A	PKMYT1	1848560	1845109	9606.ENSP00000303706	9606.ENSP00000262300	0	0	0	0	0.36	0.695	0.9	0.581	0.99
CCNB2	NCAPG	1847117	1844063	9606.ENSP00000288207	9606.ENSP00000251496	0	0	0	0	0.884	0	0.9	0.257	0.99
CDCA8	MAD2L1	1849847	1847745	9606.ENSP00000316121	9606.ENSP00000296509	0	0	0	0	0.876	0	0.9	0.304	0.99
KIF2C	CCNB2	1855643	1847117	9606.ENSP00000361298	9606.ENSP00000288207	0	0	0	0	0.834	0.123	0.9	0.407	0.99
POLE2	MCM5	1842589	1842548	9606.ENSP00000216367	9606.ENSP00000216122	0	0	0	0	0.859	0.071	0.9	0.329	0.99
PLK1	NDC80	1848135	1844946	9606.ENSP00000300093	9606.ENSP00000261597	0	0	0	0	0.678	0.529	0.9	0.445	0.99
KIF2C	CCNB1	1855643	1844435	9606.ENSP00000361298	9606.ENSP00000256442	0	0	0	0	0.84	0.123	0.9	0.41	0.99
CDCA8	CCNB2	1849847	1847117	9606.ENSP00000316121	9606.ENSP00000288207	0	0	0	0	0.864	0	0.9	0.343	0.99
RAD51	MND1	1857551	1843567	9606.ENSP00000372088	9606.ENSP00000240488	0	0	0	0	0.668	0.18	0.9	0.697	0.99
TPX2	PLK1	1848175	1848135	9606.ENSP00000300403	9606.ENSP00000300093	0	0	0	0	0.78	0	0.9	0.607	0.99
AURKB	TTK	1863844	1855108	9606.ENSP00000463999	9606.ENSP00000358813	0	0	0	0.666	0.847	0.922	0	0.574	0.989
CENPA	CDCA8	1851939	1849847	9606.ENSP00000336868	9606.ENSP00000316121	0	0	0	0	0.805	0	0.9	0.521	0.989
CDK1	UBE2C	1858283	1853360	9606.ENSP00000378699	9606.ENSP00000348838	0	0	0	0	0.853	0	0.9	0.359	0.989
ZWINT	MAD2L1	1856020	1847745	9606.ENSP00000363055	9606.ENSP00000296509	0	0	0	0	0.819	0.324	0.9	0.251	0.989
KIF4A	KIF23	1856112	1844781	9606.ENSP00000363524	9606.ENSP00000260363	0	0	0	0.627	0.831	0.169	0.9	0.816	0.989
MLF1IP	NDC80	1846726	1844946	9606.ENSP00000281453	9606.ENSP00000261597	0	0	0	0	0.796	0	0.9	0.534	0.989
NCAPG2	SMC4	1853329	1852454	9606.ENSP00000348657	9606.ENSP00000341382	0	0	0	0	0.572	0	0.9	0.779	0.989
CDK1	KIF2C	1858283	1855643	9606.ENSP00000378699	9606.ENSP00000361298	0	0	0	0	0.828	0.094	0.9	0.415	0.989
CENPA	CCNB2	1851939	1847117	9606.ENSP00000336868	9606.ENSP00000288207	0	0	0	0	0.822	0.129	0.9	0.401	0.989
CKS1B	CCNB2	1849378	1847117	9606.ENSP00000311083	9606.ENSP00000288207	0	0	0	0	0.781	0.893	0	0.599	0.989
GTSE1	PLK1	1861154	1848135	9606.ENSP00000415430	9606.ENSP00000300093	0	0	0	0	0.628	0.36	0.9	0.607	0.989
CDC25C	CCNA2	1850370	1846354	9606.ENSP00000321656	9606.ENSP00000274026	0	0	0	0	0.658	0.345	0.9	0.592	0.989
OAS1	IFI6	1859322	1852601	9606.ENSP00000388001	9606.ENSP00000342513	0	0	0	0	0.798	0	0.9	0.504	0.989
CENPA	CDC20	1851939	1849070	9606.ENSP00000336868	9606.ENSP00000308450	0	0	0	0	0.81	0.067	0.9	0.476	0.989
KIF4A	KIF11	1856112	1844817	9606.ENSP00000363524	9606.ENSP00000260731	0	0	0	0.685	0.876	0	0.9	0.656	0.989
ZWINT	SPC25	1856020	1846768	9606.ENSP00000363055	9606.ENSP00000282074	0	0	0	0	0.582	0.774	0.9	0	0.989
CENPA	CCNB1	1851939	1844435	9606.ENSP00000336868	9606.ENSP00000256442	0	0	0	0	0.797	0.129	0.9	0.464	0.989
SKA1	NDC80	1846949	1844946	9606.ENSP00000285116	9606.ENSP00000261597	0	0	0	0	0.772	0.357	0.9	0.381	0.989
CCNA2	MCM5	1846354	1842548	9606.ENSP00000274026	9606.ENSP00000216122	0	0	0	0	0.803	0.182	0.9	0.418	0.989
MCM2	ORC6	1845676	1842721	9606.ENSP00000265056	9606.ENSP00000219097	0	0	0	0	0.34	0.634	0.9	0.617	0.989
CDCA8	CDCA5	1849847	1846446	9606.ENSP00000316121	9606.ENSP00000275517	0	0	0	0	0.832	0	0.9	0.443	0.989
NDC80	KIF11	1844946	1844817	9606.ENSP00000261597	9606.ENSP00000260731	0	0	0	0	0.972	0.067	0	0.602	0.989
CENPH	NUF2	1846827	1846198	9606.ENSP00000283006	9606.ENSP00000271452	0	0	0	0	0.448	0.377	0.9	0.73	0.989
CENPA	CENPH	1851939	1846827	9606.ENSP00000336868	9606.ENSP00000283006	0	0	0	0	0.32	0.194	0.9	0.816	0.988
KIF2C	NDC80	1855643	1844946	9606.ENSP00000361298	9606.ENSP00000261597	0	0	0	0	0.792	0.067	0.9	0.492	0.988
CKS1B	CCNA2	1849378	1846354	9606.ENSP00000311083	9606.ENSP00000274026	0	0	0	0	0.652	0.924	0	0.591	0.988
CCNB1	NCAPG	1844435	1844063	9606.ENSP00000256442	9606.ENSP00000251496	0	0	0	0	0.866	0	0.9	0.212	0.988
TOP2A	ESPL1	1860923	1844556	9606.ENSP00000411532	9606.ENSP00000257934	0	0	0	0	0.945	0.667	0	0.407	0.988
FOXM1	CCNA2	1852579	1846354	9606.ENSP00000342307	9606.ENSP00000274026	0	0	0	0	0.826	0.097	0.9	0.368	0.988
TTK	AURKA	1855108	1842628	9606.ENSP00000358813	9606.ENSP00000216911	0	0	0	0.668	0.88	0.89	0	0.558	0.988
CDK1	NEK2	1858283	1854493	9606.ENSP00000378699	9606.ENSP00000355966	0	0	0.441	0.764	0.837	0.181	0.9	0.511	0.988
TACC3	AURKA	1850844	1842628	9606.ENSP00000326550	9606.ENSP00000216911	0	0	0	0	0.51	0.329	0.9	0.696	0.988
AURKB	FOXM1	1863844	1852579	9606.ENSP00000463999	9606.ENSP00000342307	0	0	0	0	0.82	0	0.9	0.414	0.988
CENPH	NDC80	1846827	1844946	9606.ENSP00000283006	9606.ENSP00000261597	0	0	0	0	0.391	0.377	0.9	0.733	0.988
AURKB	NCAPG	1863844	1844063	9606.ENSP00000463999	9606.ENSP00000251496	0	0	0	0	0.834	0	0.9	0.342	0.988
CDK1	NUF2	1858283	1846198	9606.ENSP00000378699	9606.ENSP00000271452	0	0	0	0	0.842	0	0.9	0.325	0.988
BUB1	SPC25	1848415	1846768	9606.ENSP00000302530	9606.ENSP00000282074	0	0	0	0	0.51	0.774	0.9	0.116	0.988
KIF20A	KIF2C	1858244	1855643	9606.ENSP00000378356	9606.ENSP00000361298	0	0	0	0.633	0.863	0	0.9	0.469	0.988
CCNA2	MCM6	1846354	1845487	9606.ENSP00000274026	9606.ENSP00000264156	0	0	0	0	0.726	0.347	0.9	0.433	0.988
C19orf40	FANCA	1863940	1857814	9606.ENSP00000466121	9606.ENSP00000373952	0	0	0	0	0.068	0.36	0.9	0.823	0.988
E2F1	CCNA2	1852951	1846354	9606.ENSP00000345571	9606.ENSP00000274026	0	0	0	0	0.319	0.578	0.9	0.657	0.988
MCM2	POLE2	1845676	1842589	9606.ENSP00000265056	9606.ENSP00000216367	0	0	0	0	0.824	0.099	0.9	0.354	0.988
POLD1	PRIM1	1860575	1853600	9606.ENSP00000406046	9606.ENSP00000350491	0	0	0	0	0.433	0.567	0.9	0.578	0.988
CDCA8	NUF2	1849847	1846198	9606.ENSP00000316121	9606.ENSP00000271452	0	0	0	0	0.719	0	0.9	0.621	0.988
MCM3	POLE2	1843226	1842589	9606.ENSP00000229854	9606.ENSP00000216367	0	0	0	0	0.828	0.071	0.9	0.346	0.988
KIF2C	MAD2L1	1855643	1847745	9606.ENSP00000361298	9606.ENSP00000296509	0	0	0	0	0.744	0.331	0.9	0.396	0.988
CENPP	CENPH	1856335	1846827	9606.ENSP00000364737	9606.ENSP00000283006	0	0	0	0	0.214	0.401	0.9	0.785	0.988
CDK1	HMMR	1858283	1858139	9606.ENSP00000378699	9606.ENSP00000377492	0	0	0	0	0.87	0	0.9	0.166	0.988
CCNB2	BUB1B	1847117	1847075	9606.ENSP00000288207	9606.ENSP00000287598	0	0	0	0	0.821	0.047	0.9	0.43	0.988
LIG1	MCM5	1845325	1842548	9606.ENSP00000263274	9606.ENSP00000216122	0	0	0	0	0.973	0	0	0.558	0.987
AURKB	ZWINT	1863844	1856020	9606.ENSP00000463999	9606.ENSP00000363055	0	0	0	0	0.652	0	0.9	0.671	0.987
IFI6	OAS3	1852601	1843172	9606.ENSP00000342513	9606.ENSP00000228928	0	0	0	0	0.811	0	0.9	0.408	0.987
SPC24	ZWINT	1863909	1856020	9606.ENSP00000465075	9606.ENSP00000363055	0	0	0	0	0.127	0.774	0.9	0.443	0.987
PLK4	AURKA	1846179	1842628	9606.ENSP00000270861	9606.ENSP00000216911	0	0	0	0.827	0.815	0.336	0.9	0.469	0.987
AURKB	PLK1	1863844	1848135	9606.ENSP00000463999	9606.ENSP00000300093	0	0	0	0.768	0.761	0.411	0.9	0.839	0.987
CDCA8	KIF23	1849847	1844781	9606.ENSP00000316121	9606.ENSP00000260363	0	0	0	0	0.806	0	0.9	0.402	0.987
PCNA	MCM5	1856984	1842548	9606.ENSP00000368438	9606.ENSP00000216122	0	0	0	0	0.958	0	0	0.709	0.987
NEK2	TPX2	1854493	1848175	9606.ENSP00000355966	9606.ENSP00000300403	0	0	0	0	0.835	0	0.9	0.306	0.987
CCNB2	CDK4	1847117	1844551	9606.ENSP00000288207	9606.ENSP00000257904	0	0	0	0	0.273	0.521	0.9	0.679	0.987
CDC25A	CDK4	1848560	1844551	9606.ENSP00000303706	9606.ENSP00000257904	0	0	0	0	0.116	0.409	0.9	0.781	0.987
CENPN	CENPH	1858091	1846827	9606.ENSP00000377007	9606.ENSP00000283006	0	0	0	0	0.373	0.189	0.9	0.785	0.987
CENPN	CENPK	1858091	1843648	9606.ENSP00000377007	9606.ENSP00000242872	0	0	0	0	0.378	0.133	0.9	0.79	0.987
FOXM1	CCNB2	1852579	1847117	9606.ENSP00000342307	9606.ENSP00000288207	0	0	0	0	0.81	0.097	0.9	0.34	0.987
CDCA8	NDC80	1849847	1844946	9606.ENSP00000316121	9606.ENSP00000261597	0	0	0	0	0.799	0	0.9	0.405	0.987
PRIM1	FEN1	1853600	1848737	9606.ENSP00000350491	9606.ENSP00000305480	0	0	0	0	0.836	0	0.9	0.25	0.986
CDC45	PCNA	1860553	1856984	9606.ENSP00000405726	9606.ENSP00000368438	0	0	0	0	0.607	0.774	0	0.855	0.986
MAD2L1	MLF1IP	1847745	1846726	9606.ENSP00000296509	9606.ENSP00000281453	0	0	0	0	0.856	0	0.9	0.159	0.986
AURKB	AURKA	1863844	1842628	9606.ENSP00000463999	9606.ENSP00000216911	0	0	0.527	0.963	0.855	0.094	0.9	0.79	0.986
IFI6	OASL	1852601	1844517	9606.ENSP00000342513	9606.ENSP00000257570	0	0	0	0	0.793	0	0.9	0.38	0.986
CENPA	H2AFZ	1851939	1847723	9606.ENSP00000336868	9606.ENSP00000296417	0	0	0	0	0.359	0.399	0.9	0.693	0.986
CDK1	MLF1IP	1858283	1846726	9606.ENSP00000378699	9606.ENSP00000281453	0	0	0	0	0.849	0	0.9	0.164	0.986
KIF4A	RACGAP1	1856112	1849236	9606.ENSP00000363524	9606.ENSP00000309871	0	0	0	0	0.747	0.181	0.9	0.43	0.986
TYMS	TK1	1849803	1848315	9606.ENSP00000315644	9606.ENSP00000301634	0	0	0	0	0.484	0	0.941	0.596	0.986
KIF4A	KIF2C	1856112	1855643	9606.ENSP00000363524	9606.ENSP00000361298	0	0	0	0.699	0.834	0.063	0.9	0.619	0.986
NDUFA13	NDUFA1	1861604	1855481	9606.ENSP00000423673	9606.ENSP00000360492	0	0	0	0	0.294	0.667	0.9	0.502	0.986
CENPA	OIP5	1851939	1842788	9606.ENSP00000336868	9606.ENSP00000220514	0	0	0	0	0.796	0	0.9	0.341	0.985
CDK1	PLK4	1858283	1846179	9606.ENSP00000378699	9606.ENSP00000270861	0	0	0	0.737	0.782	0.293	0.9	0.525	0.985
CDC25A	CDC6	1848560	1842453	9606.ENSP00000303706	9606.ENSP00000209728	0	0	0	0	0.381	0.531	0.9	0.549	0.985
PLK1	PKMYT1	1848135	1845109	9606.ENSP00000300093	9606.ENSP00000262300	0	0	0	0.635	0.431	0.683	0.9	0.671	0.985
AURKB	SKA1	1863844	1846949	9606.ENSP00000463999	9606.ENSP00000285116	0	0	0	0	0.566	0.357	0.9	0.554	0.985
CDK1	LMNB1	1858283	1844893	9606.ENSP00000378699	9606.ENSP00000261366	0	0	0	0	0.527	0.325	0.9	0.609	0.985
FANCA	FANCI	1857814	1849356	9606.ENSP00000373952	9606.ENSP00000310842	0	0	0	0	0.188	0	0.9	0.831	0.985
CDK1	ZWINT	1858283	1856020	9606.ENSP00000378699	9606.ENSP00000363055	0	0	0	0	0.834	0	0.9	0.182	0.985
CDCA8	RACGAP1	1849847	1849236	9606.ENSP00000316121	9606.ENSP00000309871	0	0	0	0	0.771	0	0.9	0.363	0.984
AURKB	NUF2	1863844	1846198	9606.ENSP00000463999	9606.ENSP00000271452	0	0	0	0	0.422	0.329	0.9	0.656	0.984
RRM2	TYMS	1854033	1849803	9606.ENSP00000353770	9606.ENSP00000315644	0.098	0	0	0	0.963	0	0	0.566	0.984
CCNB1	CDC6	1844435	1842453	9606.ENSP00000256442	9606.ENSP00000209728	0	0	0	0	0.715	0.817	0	0.72	0.984
KIF2C	KIF11	1855643	1844817	9606.ENSP00000361298	9606.ENSP00000260731	0	0	0	0.678	0.808	0	0.9	0.722	0.984
PRC1	KIF4A	1858173	1856112	9606.ENSP00000377793	9606.ENSP00000363524	0	0	0	0	0.831	0.463	0	0.839	0.984
CENPH	CENPM	1846827	1842528	9606.ENSP00000283006	9606.ENSP00000215980	0	0	0	0	0.21	0.126	0.9	0.797	0.984
AURKB	NCAPH	1863844	1843566	9606.ENSP00000463999	9606.ENSP00000240423	0	0	0	0	0.565	0.387	0.9	0.481	0.984
KIF20A	KIF23	1858244	1844781	9606.ENSP00000378356	9606.ENSP00000260363	0	0	0	0.694	0.81	0	0.9	0.706	0.984
MRPL22	MRPL51	1861854	1843184	9606.ENSP00000431040	9606.ENSP00000229238	0	0	0	0	0.15	0.826	0.9	0	0.984
TOP2A	SMC4	1860923	1852454	9606.ENSP00000411532	9606.ENSP00000341382	0	0	0	0	0.936	0.446	0	0.594	0.984
POLE2	CDC6	1842589	1842453	9606.ENSP00000216367	9606.ENSP00000209728	0	0	0	0	0.792	0.071	0.9	0.292	0.984
BUB1B	NUF2	1847075	1846198	9606.ENSP00000287598	9606.ENSP00000271452	0	0	0	0	0.654	0.123	0.9	0.557	0.984
CDKN2D	CDK4	1851957	1844551	9606.ENSP00000337056	9606.ENSP00000257904	0	0	0	0	0.054	0.446	0.9	0.732	0.984
UBE2T	FANCD2	1854557	1847078	9606.ENSP00000356243	9606.ENSP00000287647	0	0	0	0	0.131	0.36	0.9	0.747	0.984
ZWINT	MLF1IP	1856020	1846726	9606.ENSP00000363055	9606.ENSP00000281453	0	0	0	0	0.815	0	0.9	0.211	0.984
TOP2A	CDC6	1860923	1842453	9606.ENSP00000411532	9606.ENSP00000209728	0	0	0	0	0.729	0	0.9	0.477	0.984
CCNA2	MYBL2	1846354	1842633	9606.ENSP00000274026	9606.ENSP00000217026	0	0	0	0	0.362	0.379	0.9	0.651	0.984
KIF2C	RACGAP1	1855643	1849236	9606.ENSP00000361298	9606.ENSP00000309871	0	0	0	0	0.739	0.181	0.9	0.369	0.984
UBE2C	PLK1	1853360	1848135	9606.ENSP00000348838	9606.ENSP00000300093	0	0	0	0	0.758	0	0.9	0.389	0.983
XAF1	IFI6	1854224	1852601	9606.ENSP00000354822	9606.ENSP00000342513	0	0	0	0	0.755	0	0.9	0.372	0.983
OAS1	IFI27	1859322	1848004	9606.ENSP00000388001	9606.ENSP00000298902	0	0	0	0	0.699	0	0.9	0.504	0.983
CHEK1	MCM3	1859362	1843226	9606.ENSP00000388648	9606.ENSP00000229854	0	0	0	0	0.494	0.17	0.9	0.649	0.983
E2F1	CDC6	1852951	1842453	9606.ENSP00000345571	9606.ENSP00000209728	0	0	0	0	0.29	0.61	0.9	0.489	0.983
ZWINT	CENPA	1856020	1851939	9606.ENSP00000363055	9606.ENSP00000336868	0	0	0	0	0.736	0	0.9	0.413	0.983
CDK1	CDCA5	1858283	1846446	9606.ENSP00000378699	9606.ENSP00000275517	0	0	0	0	0.572	0.285	0.9	0.53	0.983
AURKB	CENPM	1863844	1842528	9606.ENSP00000463999	9606.ENSP00000215980	0	0	0	0	0.815	0	0.9	0.2	0.983
CDK1	MCM5	1858283	1842548	9606.ENSP00000378699	9606.ENSP00000216122	0	0	0	0	0.958	0.139	0	0.56	0.983
KIF11	CCNB1	1844817	1844435	9606.ENSP00000260731	9606.ENSP00000256442	0	0	0	0	0.94	0.274	0	0.648	0.983
CDC20	CENPM	1849070	1842528	9606.ENSP00000308450	9606.ENSP00000215980	0	0	0	0	0.827	0	0.9	0.134	0.983
MCM6	POLE2	1845487	1842589	9606.ENSP00000264156	9606.ENSP00000216367	0	0	0	0	0.749	0.071	0.9	0.367	0.983
MAD2L1	KIF11	1847745	1844817	9606.ENSP00000296509	9606.ENSP00000260731	0	0	0	0	0.943	0.331	0	0.576	0.982
HJURP	CENPN	1861060	1858091	9606.ENSP00000414109	9606.ENSP00000377007	0	0	0	0	0.668	0	0.9	0.528	0.982
TTK	KIF11	1855108	1844817	9606.ENSP00000358813	9606.ENSP00000260731	0	0	0	0	0.973	0.095	0	0.302	0.982
PCNA	TYMS	1856984	1849803	9606.ENSP00000368438	9606.ENSP00000315644	0	0	0	0	0.941	0.112	0	0.698	0.982
GMNN	CDC6	1843236	1842453	9606.ENSP00000230056	9606.ENSP00000209728	0	0	0	0	0.476	0	0.9	0.697	0.982
HMMR	NEK2	1858139	1854493	9606.ENSP00000377492	9606.ENSP00000355966	0	0	0	0	0.804	0	0.9	0.17	0.982
CDKN2A	E2F1	1859838	1852951	9606.ENSP00000394932	9606.ENSP00000345571	0	0	0	0	0.096	0.36	0.9	0.729	0.982
CDC25A	CCNB2	1848560	1847117	9606.ENSP00000303706	9606.ENSP00000288207	0	0	0	0	0.411	0.169	0.9	0.679	0.982
ZWINT	CCNB2	1856020	1847117	9606.ENSP00000363055	9606.ENSP00000288207	0	0	0	0	0.791	0	0.9	0.233	0.982
KIF2C	CENPH	1855643	1846827	9606.ENSP00000361298	9606.ENSP00000283006	0	0	0	0	0.341	0.36	0.9	0.639	0.982
ISG15	XAF1	1857024	1854224	9606.ENSP00000368699	9606.ENSP00000354822	0	0	0	0	0.759	0	0.9	0.33	0.982
NEK2	UBE2C	1854493	1853360	9606.ENSP00000355966	9606.ENSP00000348838	0	0	0	0	0.75	0	0.9	0.348	0.982
KIFC1	KIF11	1859761	1844817	9606.ENSP00000393963	9606.ENSP00000260731	0	0	0	0.683	0.566	0.514	0.9	0.738	0.982
CDC25A	CCNA2	1848560	1846354	9606.ENSP00000303706	9606.ENSP00000274026	0	0	0	0	0.535	0.122	0.9	0.614	0.982
CENPN	NDC80	1858091	1844946	9606.ENSP00000377007	9606.ENSP00000261597	0	0	0	0	0.699	0	0.9	0.464	0.982
FOXM1	MYBL2	1852579	1842633	9606.ENSP00000342307	9606.ENSP00000217026	0	0	0	0	0.5	0.222	0.9	0.6	0.982
MCM6	ORC6	1845487	1842721	9606.ENSP00000264156	9606.ENSP00000219097	0	0	0	0	0.216	0.628	0.9	0.463	0.982
CHEK1	MCM6	1859362	1845487	9606.ENSP00000388648	9606.ENSP00000264156	0	0	0	0	0.625	0.17	0.9	0.476	0.981
CCNF	UBE2S	1858453	1845564	9606.ENSP00000380256	9606.ENSP00000264552	0	0	0	0	0.155	0.182	0.9	0.769	0.981
PLK1	MLF1IP	1848135	1846726	9606.ENSP00000300093	9606.ENSP00000281453	0	0	0	0	0.171	0.329	0.9	0.706	0.981
POLD1	POLE2	1860575	1842589	9606.ENSP00000406046	9606.ENSP00000216367	0	0	0	0	0.405	0.538	0.9	0.413	0.981
XAF1	OASL	1854224	1844517	9606.ENSP00000354822	9606.ENSP00000257570	0	0	0	0	0.766	0	0.9	0.275	0.981
IFI6	IFI27	1852601	1848004	9606.ENSP00000342513	9606.ENSP00000298902	0	0	0	0.844	0.789	0	0.9	0.863	0.981
CENPN	BUB1	1858091	1848415	9606.ENSP00000377007	9606.ENSP00000302530	0	0	0	0	0.771	0	0.9	0.237	0.981
CDK1	PBK	1858283	1848348	9606.ENSP00000378699	9606.ENSP00000301905	0	0	0	0	0.905	0.446	0	0.68	0.981
ZWINT	CCNB1	1856020	1844435	9606.ENSP00000363055	9606.ENSP00000256442	0	0	0	0	0.789	0	0.9	0.195	0.981
CDC25A	CCNE1	1848560	1845190	9606.ENSP00000303706	9606.ENSP00000262643	0	0	0	0	0.263	0.393	0.9	0.64	0.981
CCNB2	CENPM	1847117	1842528	9606.ENSP00000288207	9606.ENSP00000215980	0	0	0	0	0.806	0	0.9	0.1	0.981
PTTG1	PLK1	1852874	1848135	9606.ENSP00000344936	9606.ENSP00000300093	0	0	0	0	0.601	0	0.9	0.578	0.981
CCNA2	MCM3	1846354	1843226	9606.ENSP00000274026	9606.ENSP00000229854	0	0	0	0	0.649	0.182	0.9	0.443	0.981
CENPA	PLK1	1851939	1848135	9606.ENSP00000336868	9606.ENSP00000300093	0	0	0	0	0.656	0.069	0.9	0.485	0.981
SMC4	PLK1	1852454	1848135	9606.ENSP00000341382	9606.ENSP00000300093	0	0	0	0	0.419	0.628	0.9	0.254	0.981
BUB1B	MLF1IP	1847075	1846726	9606.ENSP00000287598	9606.ENSP00000281453	0	0	0	0	0.76	0	0.9	0.283	0.981
CENPA	NUF2	1851939	1846198	9606.ENSP00000336868	9606.ENSP00000271452	0	0	0	0	0.462	0.119	0.9	0.629	0.98
MLF1IP	OIP5	1846726	1842788	9606.ENSP00000281453	9606.ENSP00000220514	0	0	0	0	0.756	0	0.9	0.268	0.98
POLD1	FEN1	1860575	1848737	9606.ENSP00000406046	9606.ENSP00000305480	0	0	0	0	0.383	0.146	0.9	0.668	0.98
HJURP	CENPM	1861060	1842528	9606.ENSP00000414109	9606.ENSP00000215980	0	0	0	0	0.793	0	0.9	0.151	0.98
CDK1	CENPN	1858283	1858091	9606.ENSP00000378699	9606.ENSP00000377007	0	0	0	0	0.791	0	0.9	0.126	0.98
PCNA	MCM6	1856984	1845487	9606.ENSP00000368438	9606.ENSP00000264156	0	0	0	0	0.935	0	0	0.711	0.98
CDC45	CDT1	1860553	1848231	9606.ENSP00000405726	9606.ENSP00000301019	0	0	0	0	0.873	0	0	0.854	0.98
HIST1H4J	H2AFZ	1853135	1847723	9606.ENSP00000347168	9606.ENSP00000296417	0	0	0	0	0.268	0.905	0	0.737	0.98
ZWINT	CDCA8	1856020	1849847	9606.ENSP00000363055	9606.ENSP00000316121	0	0	0	0	0.779	0	0.9	0.206	0.98
BUB1	MLF1IP	1848415	1846726	9606.ENSP00000302530	9606.ENSP00000281453	0	0	0	0	0.754	0	0.9	0.275	0.98
NEK2	AURKA	1854493	1842628	9606.ENSP00000355966	9606.ENSP00000216911	0	0	0.4	0.72	0.747	0.094	0.9	0.442	0.98
FOXM1	CENPA	1852579	1851939	9606.ENSP00000342307	9606.ENSP00000336868	0	0	0	0	0.736	0.083	0.9	0.289	0.98
PRIM1	CDC6	1853600	1842453	9606.ENSP00000350491	9606.ENSP00000209728	0	0	0	0	0.697	0.069	0.9	0.39	0.98
CENPK	CENPM	1843648	1842528	9606.ENSP00000242872	9606.ENSP00000215980	0	0	0	0	0.161	0.133	0.9	0.758	0.98
AURKB	CDCA5	1863844	1846446	9606.ENSP00000463999	9606.ENSP00000275517	0	0	0	0	0.587	0	0.9	0.575	0.98
CENPN	OIP5	1858091	1842788	9606.ENSP00000377007	9606.ENSP00000220514	0	0	0	0	0.762	0	0.9	0.205	0.979
CCNB1	AURKA	1844435	1842628	9606.ENSP00000256442	9606.ENSP00000216911	0	0	0	0	0.918	0.17	0	0.717	0.979
XAF1	OAS3	1854224	1843172	9606.ENSP00000354822	9606.ENSP00000228928	0	0	0	0	0.762	0	0.9	0.188	0.979
CDCA8	CENPM	1849847	1842528	9606.ENSP00000316121	9606.ENSP00000215980	0	0	0	0	0.802	0	0.9	0.063	0.979
C19orf40	FANCI	1863940	1849356	9606.ENSP00000466121	9606.ENSP00000310842	0	0	0	0	0	0	0.9	0.806	0.979
CENPN	MAD2L1	1858091	1847745	9606.ENSP00000377007	9606.ENSP00000296509	0	0	0	0	0.804	0	0.9	0	0.979
SNRPB	SRRM2	1860980	1848331	9606.ENSP00000412566	9606.ENSP00000301740	0	0	0	0	0.054	0.791	0.9	0.092	0.979
KIF2C	ESPL1	1855643	1844556	9606.ENSP00000361298	9606.ENSP00000257934	0	0	0	0	0.657	0.184	0.9	0.361	0.979
CCNE1	CDC6	1845190	1842453	9606.ENSP00000262643	9606.ENSP00000209728	0	0	0	0	0.372	0.324	0.9	0.572	0.979
OAS1	XAF1	1859322	1854224	9606.ENSP00000388001	9606.ENSP00000354822	0	0	0	0	0.745	0	0.9	0.244	0.979
TTK	CDC20	1855108	1849070	9606.ENSP00000358813	9606.ENSP00000308450	0	0	0	0	0.876	0.601	0	0.612	0.979
CDC25A	PLK1	1848560	1848135	9606.ENSP00000303706	9606.ENSP00000300093	0	0	0	0	0.325	0.12	0.9	0.702	0.979
CCNB2	KIF11	1847117	1844817	9606.ENSP00000288207	9606.ENSP00000260731	0	0	0	0	0.938	0.274	0	0.584	0.979
GMNN	MCM3	1843236	1843226	9606.ENSP00000230056	9606.ENSP00000229854	0	0	0	0	0.605	0	0.9	0.51	0.979
KIF11	NCAPG	1844817	1844063	9606.ENSP00000260731	9606.ENSP00000251496	0	0	0	0	0.974	0.083	0	0.193	0.979
BUB1	CDCA5	1848415	1846446	9606.ENSP00000302530	9606.ENSP00000275517	0	0	0	0	0.734	0	0.9	0.304	0.979
CDK1	E2F1	1858283	1852951	9606.ENSP00000378699	9606.ENSP00000345571	0	0	0	0	0.157	0.452	0.9	0.588	0.978
OIP5	CENPM	1842788	1842528	9606.ENSP00000220514	9606.ENSP00000215980	0	0	0	0	0.759	0	0.9	0.17	0.978
KIF11	AURKA	1844817	1842628	9606.ENSP00000260731	9606.ENSP00000216911	0	0	0	0	0.881	0.425	0	0.709	0.978
ZWINT	CDC20	1856020	1849070	9606.ENSP00000363055	9606.ENSP00000308450	0	0	0	0	0.693	0	0.9	0.343	0.978
AURKB	CENPN	1863844	1858091	9606.ENSP00000463999	9606.ENSP00000377007	0	0	0	0	0.741	0	0.9	0.23	0.978
POLD1	RAD51	1860575	1857551	9606.ENSP00000406046	9606.ENSP00000372088	0	0	0	0	0.204	0.275	0.9	0.673	0.978
TOP2A	NCAPG	1860923	1844063	9606.ENSP00000411532	9606.ENSP00000251496	0	0	0	0	0.95	0.119	0	0.541	0.978
CENPN	KIF2C	1858091	1855643	9606.ENSP00000377007	9606.ENSP00000361298	0	0	0	0	0.74	0	0.9	0.251	0.978
CENPN	CCNB2	1858091	1847117	9606.ENSP00000377007	9606.ENSP00000288207	0	0	0	0	0.779	0	0.9	0.097	0.978
MCM2	GMNN	1845676	1843236	9606.ENSP00000265056	9606.ENSP00000230056	0	0	0	0	0.449	0	0.9	0.642	0.978
CCNB2	MYBL2	1847117	1842633	9606.ENSP00000288207	9606.ENSP00000217026	0	0	0	0	0.482	0.292	0.9	0.485	0.978
CDK1	SPC25	1858283	1846768	9606.ENSP00000378699	9606.ENSP00000282074	0	0	0	0	0.791	0	0.9	0.052	0.978
CENPA	CDCA5	1851939	1846446	9606.ENSP00000336868	9606.ENSP00000275517	0	0	0	0	0.727	0	0.9	0.275	0.978
BUB1	CENPM	1848415	1842528	9606.ENSP00000302530	9606.ENSP00000215980	0	0	0	0	0.748	0	0.9	0.165	0.977
KIF2C	KIF23	1855643	1844781	9606.ENSP00000361298	9606.ENSP00000260363	0	0	0	0.625	0.73	0	0.9	0.53	0.977
KIF2C	CENPM	1855643	1842528	9606.ENSP00000361298	9606.ENSP00000215980	0	0	0	0	0.751	0	0.9	0.172	0.977
CDK1	PTTG1	1858283	1852874	9606.ENSP00000378699	9606.ENSP00000344936	0	0	0	0	0.876	0.36	0	0.742	0.977
NDC80	NCAPG	1844946	1844063	9606.ENSP00000261597	9606.ENSP00000251496	0	0	0	0	0.974	0	0	0.181	0.977
PSMC3IP	RAD51	1858126	1857551	9606.ENSP00000377384	9606.ENSP00000372088	0	0	0	0	0.27	0.117	0.9	0.685	0.977
FEN1	POLE2	1848737	1842589	9606.ENSP00000305480	9606.ENSP00000216367	0	0	0	0	0.743	0	0.9	0.178	0.977
BUB1	MCM3	1848415	1843226	9606.ENSP00000302530	9606.ENSP00000229854	0	0	0	0	0.967	0.045	0	0.326	0.977
CDK1	KIF23	1858283	1844781	9606.ENSP00000378699	9606.ENSP00000260363	0	0	0	0	0.948	0.094	0	0.55	0.977
DTL	POLE2	1854490	1842589	9606.ENSP00000355958	9606.ENSP00000216367	0	0	0	0	0.779	0	0.9	0	0.977
HJURP	OIP5	1861060	1842788	9606.ENSP00000414109	9606.ENSP00000220514	0	0	0	0	0.75	0	0.9	0.171	0.977
CDCA8	ESPL1	1849847	1844556	9606.ENSP00000316121	9606.ENSP00000257934	0	0	0	0	0.639	0	0.9	0.425	0.977
CENPA	CENPK	1851939	1843648	9606.ENSP00000336868	9606.ENSP00000242872	0	0	0	0	0.244	0.194	0.9	0.675	0.977
RRM2	MCM5	1854033	1842548	9606.ENSP00000353770	9606.ENSP00000216122	0	0	0	0	0.968	0	0	0.276	0.976
CCNB2	AURKA	1847117	1842628	9606.ENSP00000288207	9606.ENSP00000216911	0	0	0	0	0.928	0.17	0	0.635	0.976
RAD51AP1	POLE2	1843165	1842589	9606.ENSP00000228843	9606.ENSP00000216367	0	0	0	0	0.744	0	0.9	0.148	0.976
ZWINT	KIF2C	1856020	1855643	9606.ENSP00000363055	9606.ENSP00000361298	0	0	0	0	0.679	0	0.9	0.335	0.976
AURKB	SMC4	1863844	1852454	9606.ENSP00000463999	9606.ENSP00000341382	0	0	0	0	0.425	0.264	0.9	0.514	0.976
PLK1	ECT2	1848135	1843313	9606.ENSP00000300093	9606.ENSP00000232458	0	0	0	0	0.372	0.36	0.9	0.492	0.976
TTK	NCAPG	1855108	1844063	9606.ENSP00000358813	9606.ENSP00000251496	0	0	0	0	0.974	0	0	0.126	0.976
DTL	CDC6	1854490	1842453	9606.ENSP00000355958	9606.ENSP00000209728	0	0	0	0	0.964	0	0	0.359	0.976
NUF2	CCNB1	1846198	1844435	9606.ENSP00000271452	9606.ENSP00000256442	0	0	0	0	0.663	0	0.9	0.345	0.976
HMMR	PLK4	1858139	1846179	9606.ENSP00000377492	9606.ENSP00000270861	0	0	0	0	0.751	0	0.9	0.127	0.976
C19orf40	FANCD2	1863940	1847078	9606.ENSP00000466121	9606.ENSP00000287647	0	0	0	0	0.072	0	0.9	0.762	0.976
KIF2C	AURKA	1855643	1842628	9606.ENSP00000361298	9606.ENSP00000216911	0	0	0	0	0.869	0.41	0	0.714	0.976
CENPA	SPC25	1851939	1846768	9606.ENSP00000336868	9606.ENSP00000282074	0	0	0	0	0.748	0	0.9	0.135	0.976
GTSE1	CCNB2	1861154	1847117	9606.ENSP00000415430	9606.ENSP00000288207	0	0	0	0	0.703	0	0.9	0.271	0.976
KIF2C	NUF2	1855643	1846198	9606.ENSP00000361298	9606.ENSP00000271452	0	0	0	0	0.47	0.166	0.9	0.515	0.975
CDC20	NUF2	1849070	1846198	9606.ENSP00000308450	9606.ENSP00000271452	0	0	0	0	0.493	0	0.9	0.546	0.975
CHEK1	PCNA	1859362	1856984	9606.ENSP00000388648	9606.ENSP00000368438	0	0	0	0	0.53	0.55	0	0.891	0.975
CENPN	CDCA8	1858091	1849847	9606.ENSP00000377007	9606.ENSP00000316121	0	0	0	0	0.757	0	0.9	0.076	0.975
CCNB1	CENPM	1844435	1842528	9606.ENSP00000256442	9606.ENSP00000215980	0	0	0	0	0.754	0	0.9	0.073	0.975
CCNB1	MYBL2	1844435	1842633	9606.ENSP00000256442	9606.ENSP00000217026	0	0	0	0	0.309	0.292	0.9	0.558	0.975
PRC1	KIF23	1858173	1844781	9606.ENSP00000377793	9606.ENSP00000260363	0	0	0	0	0.795	0.463	0	0.79	0.975
CDK1	CDKN3	1858283	1851839	9606.ENSP00000378699	9606.ENSP00000335357	0	0	0	0	0.88	0.446	0	0.663	0.975
CDK1	CENPM	1858283	1842528	9606.ENSP00000378699	9606.ENSP00000215980	0	0	0	0	0.756	0	0.9	0.065	0.975
TOP2A	PRC1	1860923	1858173	9606.ENSP00000411532	9606.ENSP00000377793	0	0	0	0	0.968	0	0	0.237	0.975
SMC4	KIF11	1852454	1844817	9606.ENSP00000341382	9606.ENSP00000260731	0	0	0	0	0.966	0.111	0	0.204	0.974
E2F1	MYBL2	1852951	1842633	9606.ENSP00000345571	9606.ENSP00000217026	0	0	0	0	0.322	0.457	0.9	0.39	0.974
PCNA	POLE2	1856984	1842589	9606.ENSP00000368438	9606.ENSP00000216367	0	0	0	0	0.481	0.182	0.9	0.461	0.974
E2F1	CDK4	1852951	1844551	9606.ENSP00000345571	9606.ENSP00000257904	0	0	0	0	0.111	0.179	0.9	0.694	0.974
BUB1	CENPH	1848415	1846827	9606.ENSP00000302530	9606.ENSP00000283006	0	0	0	0	0.584	0	0.9	0.441	0.974
HIST1H4J	CENPA	1853135	1851939	9606.ENSP00000347168	9606.ENSP00000336868	0	0	0	0	0.202	0.896	0	0.71	0.974
IFI27	OASL	1848004	1844517	9606.ENSP00000298902	9606.ENSP00000257570	0	0	0	0	0.613	0	0.9	0.399	0.974
MAD2L1	ESPL1	1847745	1844556	9606.ENSP00000296509	9606.ENSP00000257934	0	0	0	0	0.236	0.096	0.9	0.668	0.974
ASPM	KIF11	1854584	1844817	9606.ENSP00000356379	9606.ENSP00000260731	0	0	0	0	0.97	0	0	0.168	0.974
CDCA5	NUF2	1846446	1846198	9606.ENSP00000275517	9606.ENSP00000271452	0	0	0	0	0.682	0	0.9	0.274	0.974
BUB1	CENPK	1848415	1843648	9606.ENSP00000302530	9606.ENSP00000242872	0	0	0	0	0.694	0	0.9	0.189	0.973
CDCA5	CCNB1	1846446	1844435	9606.ENSP00000275517	9606.ENSP00000256442	0	0	0	0	0.677	0	0.9	0.244	0.973
EXO1	RAD51AP1	1849472	1843165	9606.ENSP00000311873	9606.ENSP00000228843	0	0	0	0	0.722	0	0.9	0.115	0.973
MAD2L1	SPC25	1847745	1846768	9606.ENSP00000296509	9606.ENSP00000282074	0	0	0	0	0.717	0	0.9	0.132	0.973
CENPA	HIST1H2AE	1851939	1848523	9606.ENSP00000336868	9606.ENSP00000303373	0	0	0	0	0.548	0.873	0	0.567	0.973
ISG15	PCNA	1857024	1856984	9606.ENSP00000368699	9606.ENSP00000368438	0	0	0	0	0.055	0.456	0.9	0.547	0.973
TPX2	PLK4	1848175	1846179	9606.ENSP00000300403	9606.ENSP00000270861	0	0	0	0	0.71	0	0.9	0.16	0.973
CDK1	NCAPH	1858283	1843566	9606.ENSP00000378699	9606.ENSP00000240423	0	0	0	0	0.567	0.326	0.9	0.184	0.973
CDT1	CCNE1	1848231	1845190	9606.ENSP00000301019	9606.ENSP00000262643	0	0	0	0	0.361	0.324	0.9	0.467	0.973
MLF1IP	NUF2	1846726	1846198	9606.ENSP00000281453	9606.ENSP00000271452	0	0	0	0	0.66	0	0.9	0.26	0.972
ZWINT	CENPM	1856020	1842528	9606.ENSP00000363055	9606.ENSP00000215980	0	0	0	0	0.681	0	0.9	0.195	0.972
UBE2T	FANCI	1854557	1849356	9606.ENSP00000356243	9606.ENSP00000310842	0	0	0	0	0.422	0	0.9	0.566	0.972
CENPN	CDC20	1858091	1849070	9606.ENSP00000377007	9606.ENSP00000308450	0	0	0	0	0.69	0	0.9	0.169	0.972
AURKB	KIF11	1863844	1844817	9606.ENSP00000463999	9606.ENSP00000260731	0	0	0	0	0.862	0.179	0	0.779	0.972
MAD2L1	CDCA5	1847745	1846446	9606.ENSP00000296509	9606.ENSP00000275517	0	0	0	0	0.668	0	0.9	0.242	0.972
MAGOHB	SNRPF	1850128	1845900	9606.ENSP00000319240	9606.ENSP00000266735	0	0	0	0	0.735	0	0.9	0	0.972
KIF2C	SKA1	1855643	1846949	9606.ENSP00000361298	9606.ENSP00000285116	0	0	0	0	0.649	0	0.9	0.27	0.972
NDC80	AURKA	1844946	1842628	9606.ENSP00000261597	9606.ENSP00000216911	0	0	0	0	0.87	0.504	0	0.607	0.972
PRC1	CCNB1	1858173	1844435	9606.ENSP00000377793	9606.ENSP00000256442	0	0	0	0	0.903	0.446	0	0.511	0.971
XAF1	IFI27	1854224	1848004	9606.ENSP00000354822	9606.ENSP00000298902	0	0	0	0	0.606	0	0.9	0.345	0.971
PRC1	BUB1B	1858173	1847075	9606.ENSP00000377793	9606.ENSP00000287598	0	0	0	0	0.944	0.169	0	0.434	0.971
CDC20	KIF11	1849070	1844817	9606.ENSP00000308450	9606.ENSP00000260731	0	0	0	0	0.916	0.173	0	0.613	0.971
MAD1L1	NDC80	1845817	1844946	9606.ENSP00000265854	9606.ENSP00000261597	0	0	0	0	0.124	0.395	0.9	0.532	0.971
BUB1B	CENPM	1847075	1842528	9606.ENSP00000287598	9606.ENSP00000215980	0	0	0	0	0.662	0	0.9	0.212	0.971
RAN	H2AFZ	1857999	1847723	9606.ENSP00000376176	9606.ENSP00000296417	0	0	0	0	0.718	0	0.9	0.078	0.971
H2AFZ	CCNB1	1847723	1844435	9606.ENSP00000296417	9606.ENSP00000256442	0	0	0	0	0.474	0.172	0.9	0.421	0.971
POLD1	EXO1	1860575	1849472	9606.ENSP00000406046	9606.ENSP00000311873	0	0	0	0	0.348	0.194	0.9	0.516	0.971
IFI27	OAS3	1848004	1843172	9606.ENSP00000298902	9606.ENSP00000228928	0	0	0	0	0.6	0	0.9	0.344	0.971
RAD51	RAD54L	1857551	1855592	9606.ENSP00000372088	9606.ENSP00000361043	0	0	0	0	0.565	0.801	0	0.698	0.971
PRC1	RACGAP1	1858173	1849236	9606.ENSP00000377793	9606.ENSP00000309871	0	0	0	0	0.854	0.36	0	0.721	0.971
LIG1	MCM3	1845325	1843226	9606.ENSP00000263274	9606.ENSP00000229854	0	0	0	0	0.938	0	0	0.552	0.971
ISG20	OASL	1848861	1844517	9606.ENSP00000306565	9606.ENSP00000257570	0	0	0	0	0.536	0	0.9	0.422	0.97
TOP2A	NDC80	1860923	1844946	9606.ENSP00000411532	9606.ENSP00000261597	0	0	0	0	0.963	0	0	0.225	0.97
CDK1	NCAPG2	1858283	1853329	9606.ENSP00000378699	9606.ENSP00000348657	0	0	0	0	0.714	0	0.9	0.063	0.97
FZD2	WNT6	1850594	1843375	9606.ENSP00000323901	9606.ENSP00000233948	0	0	0	0	0.044	0.376	0.9	0.561	0.97
MLF1IP	CCNB1	1846726	1844435	9606.ENSP00000281453	9606.ENSP00000256442	0	0	0	0	0.687	0	0.9	0.141	0.97
CENPP	CENPA	1856335	1851939	9606.ENSP00000364737	9606.ENSP00000336868	0	0	0	0	0.127	0	0.9	0.685	0.97
CCNB2	MLF1IP	1847117	1846726	9606.ENSP00000288207	9606.ENSP00000281453	0	0	0	0	0.703	0	0.9	0.074	0.97
FEN1	MCM6	1848737	1845487	9606.ENSP00000305480	9606.ENSP00000264156	0	0	0	0	0.939	0.065	0	0.519	0.97
E2F1	CCNB1	1852951	1844435	9606.ENSP00000345571	9606.ENSP00000256442	0	0	0	0	0.189	0.256	0.9	0.572	0.97
KIF20A	PRC1	1858244	1858173	9606.ENSP00000378356	9606.ENSP00000377793	0	0	0	0	0.855	0.196	0	0.77	0.97
NUF2	CENPK	1846198	1843648	9606.ENSP00000271452	9606.ENSP00000242872	0	0	0	0	0.636	0	0.9	0.247	0.97
BUB1B	SPC25	1847075	1846768	9606.ENSP00000287598	9606.ENSP00000282074	0	0	0	0	0.714	0	0.9	0.041	0.97
CCNB2	SPC25	1847117	1846768	9606.ENSP00000288207	9606.ENSP00000282074	0	0	0	0	0.662	0	0.9	0.188	0.97
GPX8	ERO1L	1861608	1858318	9606.ENSP00000423822	9606.ENSP00000379042	0	0	0	0	0.055	0.36	0.9	0.553	0.969
PCNA	CCNA2	1856984	1846354	9606.ENSP00000368438	9606.ENSP00000274026	0	0	0	0	0.669	0.726	0	0.69	0.969
EXO1	POLE2	1849472	1842589	9606.ENSP00000311873	9606.ENSP00000216367	0	0	0	0	0.661	0	0.9	0.161	0.969
CDK1	ORC6	1858283	1842721	9606.ENSP00000378699	9606.ENSP00000219097	0	0	0	0	0.428	0	0.9	0.505	0.969
CKS2	MAD2L1	1856383	1847745	9606.ENSP00000364976	9606.ENSP00000296509	0	0	0	0	0.956	0	0	0.334	0.969
NEK2	FOXM1	1854493	1852579	9606.ENSP00000355966	9606.ENSP00000342307	0	0	0	0	0.632	0	0.9	0.209	0.968
CENPA	SKA1	1851939	1846949	9606.ENSP00000336868	9606.ENSP00000285116	0	0	0	0	0.646	0	0.9	0.186	0.968
CENPA	ESPL1	1851939	1844556	9606.ENSP00000336868	9606.ENSP00000257934	0	0	0	0	0.457	0	0.9	0.472	0.968
CENPN	CENPP	1858091	1856335	9606.ENSP00000377007	9606.ENSP00000364737	0	0	0	0	0.17	0.133	0.9	0.618	0.968
CDK1	H2AFZ	1858283	1847723	9606.ENSP00000378699	9606.ENSP00000296417	0	0	0	0	0.533	0.099	0.9	0.335	0.968
SNRNP70	SRRM2	1864888	1848331	9606.ENSP00000472998	9606.ENSP00000301740	0	0	0	0	0.153	0.503	0.9	0.349	0.968
MCM3	ORC6	1843226	1842721	9606.ENSP00000229854	9606.ENSP00000219097	0	0	0	0	0.324	0.12	0.9	0.535	0.968
SRRM2	SNRPF	1848331	1845900	9606.ENSP00000301740	9606.ENSP00000266735	0	0	0	0	0	0.691	0.9	0.045	0.968
STMN1	CDK1	1860849	1858283	9606.ENSP00000410452	9606.ENSP00000378699	0	0	0	0	0.364	0.36	0.9	0.325	0.968
SUV39H1	H2AFZ	1856539	1847723	9606.ENSP00000365877	9606.ENSP00000296417	0	0	0	0	0.064	0.171	0.9	0.64	0.968
NDC80	CENPM	1844946	1842528	9606.ENSP00000261597	9606.ENSP00000215980	0	0	0	0	0.62	0	0.9	0.225	0.968
CCNB2	CDCA5	1847117	1846446	9606.ENSP00000288207	9606.ENSP00000275517	0	0	0	0	0.602	0	0.9	0.277	0.968
SPC25	CCNB1	1846768	1844435	9606.ENSP00000282074	9606.ENSP00000256442	0	0	0	0	0.673	0	0.9	0.1	0.968
CENPN	CCNB1	1858091	1844435	9606.ENSP00000377007	9606.ENSP00000256442	0	0	0	0	0.669	0	0.9	0.099	0.967
ZWINT	CDCA5	1856020	1846446	9606.ENSP00000363055	9606.ENSP00000275517	0	0	0	0	0.679	0	0.9	0.062	0.967
KIFC1	KIF22	1859761	1842279	9606.ENSP00000393963	9606.ENSP00000160827	0	0	0	0.672	0.481	0.292	0.9	0.56	0.967
PRC1	KIF11	1858173	1844817	9606.ENSP00000377793	9606.ENSP00000260731	0	0	0	0	0.892	0.265	0	0.625	0.967
MAD2L1	CENPK	1847745	1843648	9606.ENSP00000296509	9606.ENSP00000242872	0	0	0	0	0.669	0	0.9	0.082	0.967
CCNB2	CDC6	1847117	1842453	9606.ENSP00000288207	9606.ENSP00000209728	0	0	0	0	0.605	0.741	0	0.71	0.967
TYMS	MCM5	1849803	1842548	9606.ENSP00000315644	9606.ENSP00000216122	0	0	0	0	0.962	0	0	0.176	0.967
EPRS	GAPDH	1854472	1843185	9606.ENSP00000355890	9606.ENSP00000229239	0.063	0	0	0	0.105	0	0.9	0.656	0.967
OAS1	OAS3	1859322	1843172	9606.ENSP00000388001	9606.ENSP00000228928	0	0	0	0.943	0.838	0	0.8	0.861	0.967
BUB1B	SKA1	1847075	1846949	9606.ENSP00000287598	9606.ENSP00000285116	0	0	0	0	0.62	0	0.9	0.214	0.967
CDC20	CDCA5	1849070	1846446	9606.ENSP00000308450	9606.ENSP00000275517	0	0	0	0	0.535	0	0.9	0.348	0.967
TOP2A	CDK1	1860923	1858283	9606.ENSP00000411532	9606.ENSP00000378699	0	0	0	0	0.887	0.36	0	0.589	0.967
NT5M	AK4	1857785	1850420	9606.ENSP00000373674	9606.ENSP00000322175	0	0	0	0	0	0	0.9	0.693	0.967
CDK1	GMNN	1858283	1843236	9606.ENSP00000378699	9606.ENSP00000230056	0	0	0	0	0.771	0.774	0	0.423	0.967
CENPP	CENPM	1856335	1842528	9606.ENSP00000364737	9606.ENSP00000215980	0	0	0	0	0.126	0.133	0.9	0.619	0.967
PBK	CCNB1	1848348	1844435	9606.ENSP00000301905	9606.ENSP00000256442	0	0	0	0	0.892	0.412	0	0.52	0.967
CDCA8	SPC25	1849847	1846768	9606.ENSP00000316121	9606.ENSP00000282074	0	0	0	0	0.613	0	0.9	0.223	0.967
BUB1	MCM5	1848415	1842548	9606.ENSP00000302530	9606.ENSP00000216122	0	0	0	0	0.957	0.052	0	0.264	0.967
SPC24	CENPH	1863909	1846827	9606.ENSP00000465075	9606.ENSP00000283006	0	0	0	0	0.191	0	0.9	0.63	0.967
TOP2A	RACGAP1	1860923	1849236	9606.ENSP00000411532	9606.ENSP00000309871	0	0	0	0	0.957	0	0	0.237	0.966
PRC1	AURKA	1858173	1842628	9606.ENSP00000377793	9606.ENSP00000216911	0	0	0	0	0.941	0.042	0	0.457	0.966
HIST1H4J	HIST1H2AE	1853135	1848523	9606.ENSP00000347168	9606.ENSP00000303373	0	0.001	0	0	0.301	0.861	0	0.679	0.966
SPC24	CDCA8	1863909	1849847	9606.ENSP00000465075	9606.ENSP00000316121	0	0	0	0	0.504	0	0.9	0.375	0.966
UBE2C	UBE2S	1853360	1845564	9606.ENSP00000348838	9606.ENSP00000264552	0	0	0	0.8	0.604	0.11	0.9	0.696	0.966
PLK1	KIF11	1848135	1844817	9606.ENSP00000300093	9606.ENSP00000260731	0	0	0	0	0.826	0	0	0.816	0.966
RAN	NUP214	1857999	1853838	9606.ENSP00000376176	9606.ENSP00000352400	0	0	0	0	0.055	0	0.9	0.672	0.966
KIF2C	MLF1IP	1855643	1846726	9606.ENSP00000361298	9606.ENSP00000281453	0	0	0	0	0.614	0	0.9	0.201	0.966
CENPN	CENPW	1858091	1854781	9606.ENSP00000377007	9606.ENSP00000357311	0	0	0	0	0.147	0	0.9	0.63	0.965
RAD51	RMI2	1857551	1849289	9606.ENSP00000372088	9606.ENSP00000310356	0	0	0	0	0.539	0	0.9	0.305	0.965
KIF2C	SPC25	1855643	1846768	9606.ENSP00000361298	9606.ENSP00000282074	0	0	0	0	0.647	0	0.9	0.101	0.965
CCNB2	MCM2	1847117	1845676	9606.ENSP00000288207	9606.ENSP00000265056	0	0	0	0	0.816	0.654	0	0.505	0.965
TPX2	KIF11	1848175	1844817	9606.ENSP00000300403	9606.ENSP00000260731	0	0	0	0	0.847	0	0	0.784	0.965
CDK1	CDT1	1858283	1848231	9606.ENSP00000378699	9606.ENSP00000301019	0	0	0	0	0.635	0.793	0	0.573	0.965
TTK	ESPL1	1855108	1844556	9606.ENSP00000358813	9606.ENSP00000257934	0	0	0	0	0.763	0.774	0	0.398	0.965
AURKB	PRC1	1863844	1858173	9606.ENSP00000463999	9606.ENSP00000377793	0	0	0	0	0.93	0.042	0	0.524	0.965
HJURP	MLF1IP	1861060	1846726	9606.ENSP00000414109	9606.ENSP00000281453	0	0	0	0	0.584	0	0.9	0.242	0.965
TOP2A	TYMS	1860923	1849803	9606.ENSP00000411532	9606.ENSP00000315644	0	0	0	0	0.882	0.059	0	0.711	0.965
CDK1	TTK	1858283	1855108	9606.ENSP00000378699	9606.ENSP00000358813	0	0	0	0.685	0.884	0.667	0	0.458	0.965
E2F1	CCNE1	1852951	1845190	9606.ENSP00000345571	9606.ENSP00000262643	0	0	0	0	0.145	0.384	0.9	0.426	0.965
KIF20A	MCM5	1858244	1842548	9606.ENSP00000378356	9606.ENSP00000216122	0	0	0	0	0.962	0	0	0.125	0.965
KIAA0101	POLE2	1848123	1842589	9606.ENSP00000300035	9606.ENSP00000216367	0	0	0	0	0.658	0	0.9	0.068	0.965
BUB1	SKA1	1848415	1846949	9606.ENSP00000302530	9606.ENSP00000285116	0	0	0	0	0.6	0	0.9	0.193	0.964
PLK1	CDCA5	1848135	1846446	9606.ENSP00000300093	9606.ENSP00000275517	0	0	0	0	0.379	0.285	0.9	0.304	0.964
MAD2L1	CENPM	1847745	1842528	9606.ENSP00000296509	9606.ENSP00000215980	0	0	0	0	0.641	0	0.9	0.086	0.964
CENPN	BUB1B	1858091	1847075	9606.ENSP00000377007	9606.ENSP00000287598	0	0	0	0	0.559	0	0.9	0.25	0.964
EXO1	RMI2	1849472	1849289	9606.ENSP00000311873	9606.ENSP00000310356	0	0	0	0	0.559	0	0.9	0.258	0.964
KIF2C	CDCA5	1855643	1846446	9606.ENSP00000361298	9606.ENSP00000275517	0	0	0	0	0.549	0	0.9	0.277	0.964
SMC4	NDC80	1852454	1844946	9606.ENSP00000341382	9606.ENSP00000261597	0	0	0	0	0.939	0.17	0	0.345	0.964
NEK2	PLK4	1854493	1846179	9606.ENSP00000355966	9606.ENSP00000270861	0	0	0	0.691	0.624	0	0.9	0.333	0.964
SPC24	CDC20	1863909	1849070	9606.ENSP00000465075	9606.ENSP00000308450	0	0	0	0	0.422	0	0.9	0.435	0.964
CCNA2	PLK4	1846354	1846179	9606.ENSP00000274026	9606.ENSP00000270861	0	0	0	0	0.839	0.513	0	0.582	0.964
CHEK1	MCM5	1859362	1842548	9606.ENSP00000388648	9606.ENSP00000216122	0	0	0	0	0.41	0.17	0.9	0.361	0.964
SMC4	CCNB1	1852454	1844435	9606.ENSP00000341382	9606.ENSP00000256442	0	0	0	0	0.548	0.052	0.9	0.259	0.964
KIFC1	KIF23	1859761	1844781	9606.ENSP00000393963	9606.ENSP00000260363	0	0	0	0.631	0.352	0.363	0.9	0.543	0.963
OAS1	ISG20	1859322	1848861	9606.ENSP00000388001	9606.ENSP00000306565	0	0	0	0	0.268	0	0.9	0.541	0.963
NEK2	NDC80	1854493	1844946	9606.ENSP00000355966	9606.ENSP00000261597	0	0	0	0	0.833	0.403	0	0.662	0.963
NEK2	BUB1	1854493	1848415	9606.ENSP00000355966	9606.ENSP00000302530	0	0	0	0	0.899	0.395	0	0.439	0.963
AURKB	TPX2	1863844	1848175	9606.ENSP00000463999	9606.ENSP00000300403	0	0	0	0	0.867	0.394	0	0.579	0.963
CCNB2	KIF23	1847117	1844781	9606.ENSP00000288207	9606.ENSP00000260363	0	0	0	0	0.937	0.123	0	0.383	0.963
HMMR	PLK1	1858139	1848135	9606.ENSP00000377492	9606.ENSP00000300093	0	0	0	0	0.579	0	0.9	0.21	0.963
NDC80	CENPK	1844946	1843648	9606.ENSP00000261597	9606.ENSP00000242872	0	0	0	0	0.483	0	0.9	0.343	0.963
ZWINT	ESPL1	1856020	1844556	9606.ENSP00000363055	9606.ENSP00000257934	0	0	0	0	0.406	0	0.9	0.417	0.962
CDCA5	NDC80	1846446	1844946	9606.ENSP00000275517	9606.ENSP00000261597	0	0	0	0	0.579	0	0.9	0.172	0.962
KIFC1	KIF20A	1859761	1858244	9606.ENSP00000393963	9606.ENSP00000378356	0	0	0	0.634	0.376	0.363	0.9	0.394	0.962
TOP2A	CDC20	1860923	1849070	9606.ENSP00000411532	9606.ENSP00000308450	0	0	0	0	0.934	0	0	0.448	0.962
MCM6	GINS1	1845487	1845151	9606.ENSP00000264156	9606.ENSP00000262460	0	0	0	0	0.291	0.292	0.9	0.335	0.962
AURKB	SPC25	1863844	1846768	9606.ENSP00000463999	9606.ENSP00000282074	0	0	0	0	0.605	0	0.9	0.123	0.962
CCNB2	NUF2	1847117	1846198	9606.ENSP00000288207	9606.ENSP00000271452	0	0	0	0	0.544	0	0.9	0.241	0.962
HJURP	CENPH	1861060	1846827	9606.ENSP00000414109	9606.ENSP00000283006	0	0	0	0	0.193	0	0.9	0.567	0.962
PTTG1	CCNB1	1852874	1844435	9606.ENSP00000344936	9606.ENSP00000256442	0	0	0	0	0.893	0	0	0.658	0.961
BUB1B	CDCA5	1847075	1846446	9606.ENSP00000287598	9606.ENSP00000275517	0	0	0	0	0.549	0	0.9	0.213	0.961
TOP2A	BUB1	1860923	1848415	9606.ENSP00000411532	9606.ENSP00000302530	0	0	0	0	0.934	0.048	0	0.439	0.961
KIF23	MCM5	1844781	1842548	9606.ENSP00000260363	9606.ENSP00000216122	0	0	0	0	0.955	0	0	0.166	0.961
UBE2C	ESPL1	1853360	1844556	9606.ENSP00000348838	9606.ENSP00000257934	0	0	0	0	0.49	0	0.9	0.306	0.961
BUB1B	CENPH	1847075	1846827	9606.ENSP00000287598	9606.ENSP00000283006	0	0	0	0	0.357	0	0.9	0.445	0.961
SPC24	SKA1	1863909	1846949	9606.ENSP00000465075	9606.ENSP00000285116	0	0	0	0	0.243	0.357	0.9	0.307	0.961
KIF20A	BUB1	1858244	1848415	9606.ENSP00000378356	9606.ENSP00000302530	0	0	0	0	0.931	0.197	0	0.356	0.961
NUP214	NUTF2	1853838	1842726	9606.ENSP00000352400	9606.ENSP00000219169	0	0	0	0	0	0	0.9	0.633	0.961
CENPW	CENPH	1854781	1846827	9606.ENSP00000357311	9606.ENSP00000283006	0	0	0	0	0.155	0	0.9	0.576	0.961
PLK1	NUF2	1848135	1846198	9606.ENSP00000300093	9606.ENSP00000271452	0	0	0	0	0.404	0	0.9	0.408	0.961
GTSE1	CDK1	1861154	1858283	9606.ENSP00000415430	9606.ENSP00000378699	0	0	0	0	0.59	0	0.9	0.127	0.961
CCNB1	NCAPH	1844435	1843566	9606.ENSP00000256442	9606.ENSP00000240423	0	0	0	0	0.563	0	0.9	0.189	0.961
ESPL1	CCNB1	1844556	1844435	9606.ENSP00000257934	9606.ENSP00000256442	0	0	0	0	0.46	0.802	0	0.658	0.96
SNRPB	GEMIN7	1860980	1846143	9606.ENSP00000412566	9606.ENSP00000270257	0	0	0	0	0.093	0.359	0.9	0.402	0.96
CDKN3	CCNB1	1851839	1844435	9606.ENSP00000335357	9606.ENSP00000256442	0	0	0	0	0.886	0.17	0	0.614	0.96
CCNA2	CCNE1	1846354	1845190	9606.ENSP00000274026	9606.ENSP00000262643	0	0	0	0.682	0.475	0.097	0.9	0.747	0.96
CDCA8	AURKA	1849847	1842628	9606.ENSP00000316121	9606.ENSP00000216911	0	0	0	0	0.871	0	0.54	0.384	0.96
TOP2A	RRM2	1860923	1854033	9606.ENSP00000411532	9606.ENSP00000353770	0.073	0	0	0	0.88	0	0	0.673	0.96
CDCA8	SKA1	1849847	1846949	9606.ENSP00000316121	9606.ENSP00000285116	0	0	0	0	0.569	0	0.9	0.147	0.96
NCAPG2	CCNB1	1853329	1844435	9606.ENSP00000348657	9606.ENSP00000256442	0	0	0	0	0.619	0	0.9	0.051	0.96
CHEK1	RMI2	1859362	1849289	9606.ENSP00000388648	9606.ENSP00000310356	0	0	0	0	0.565	0	0.9	0.169	0.96
RRM2	MCM3	1854033	1843226	9606.ENSP00000353770	9606.ENSP00000229854	0	0	0	0	0.946	0	0	0.282	0.96
SPC24	AURKB	1863909	1863844	9606.ENSP00000465075	9606.ENSP00000463999	0	0	0	0	0.345	0	0.9	0.442	0.96
SPC24	CDK1	1863909	1858283	9606.ENSP00000465075	9606.ENSP00000378699	0	0	0	0	0.504	0	0.9	0.245	0.959
ST8SIA1	B4GALNT1	1858355	1852474	9606.ENSP00000379353	9606.ENSP00000341562	0	0	0	0	0	0	0.9	0.61	0.959
PCNA	CDT1	1856984	1848231	9606.ENSP00000368438	9606.ENSP00000301019	0	0	0	0	0.323	0.546	0	0.878	0.959
CKS1B	MAD2L1	1849378	1847745	9606.ENSP00000311083	9606.ENSP00000296509	0	0	0	0	0.949	0	0	0.241	0.959
CDC20	SKA1	1849070	1846949	9606.ENSP00000308450	9606.ENSP00000285116	0	0	0	0	0.576	0	0.9	0.126	0.959
GTSE1	CCNB1	1861154	1844435	9606.ENSP00000415430	9606.ENSP00000256442	0	0	0	0	0.495	0	0.9	0.255	0.959
SMC4	CCNB2	1852454	1847117	9606.ENSP00000341382	9606.ENSP00000288207	0	0	0	0	0.544	0.052	0.9	0.179	0.959
NEK2	PLK1	1854493	1848135	9606.ENSP00000355966	9606.ENSP00000300093	0	0	0	0.686	0.473	0	0.9	0.807	0.958
FOXM1	CDC25A	1852579	1848560	9606.ENSP00000342307	9606.ENSP00000303706	0	0	0	0	0.441	0.107	0.9	0.257	0.958
CDC20	SPC25	1849070	1846768	9606.ENSP00000308450	9606.ENSP00000282074	0	0	0	0	0.546	0	0.9	0.148	0.958
TTK	CDCA8	1855108	1849847	9606.ENSP00000358813	9606.ENSP00000316121	0	0	0	0	0.875	0.285	0	0.565	0.958
PRIM1	ORC6	1853600	1842721	9606.ENSP00000350491	9606.ENSP00000219097	0	0	0	0	0.531	0	0.9	0.181	0.958
KIFC1	RACGAP1	1859761	1849236	9606.ENSP00000393963	9606.ENSP00000309871	0	0	0	0	0.486	0.181	0.9	0.137	0.958
CENPN	ZWINT	1858091	1856020	9606.ENSP00000377007	9606.ENSP00000363055	0	0	0	0	0.437	0	0.9	0.304	0.957
CDK1	MYBL2	1858283	1842633	9606.ENSP00000378699	9606.ENSP00000217026	0	0	0	0	0.294	0.189	0.9	0.348	0.957
PCNA	E2F1	1856984	1852951	9606.ENSP00000368438	9606.ENSP00000345571	0	0	0	0	0.13	0	0.9	0.553	0.957
CENPN	CDCA5	1858091	1846446	9606.ENSP00000377007	9606.ENSP00000275517	0	0	0	0	0.577	0	0.9	0.064	0.957
ZWINT	CENPH	1856020	1846827	9606.ENSP00000363055	9606.ENSP00000283006	0	0	0	0	0.24	0	0.9	0.488	0.957
LIG1	POLE2	1845325	1842589	9606.ENSP00000263274	9606.ENSP00000216367	0	0	0	0	0.514	0	0.9	0.186	0.957
SPC24	BUB1B	1863909	1847075	9606.ENSP00000465075	9606.ENSP00000287598	0	0	0	0	0.285	0	0.9	0.441	0.956
CCNB2	NCAPH	1847117	1843566	9606.ENSP00000288207	9606.ENSP00000240423	0	0	0	0	0.513	0	0.9	0.175	0.956
CENPH	OIP5	1846827	1842788	9606.ENSP00000283006	9606.ENSP00000220514	0	0	0	0	0.464	0	0.9	0.248	0.956
SPC24	CDCA5	1863909	1846446	9606.ENSP00000465075	9606.ENSP00000275517	0	0	0	0	0.469	0	0.9	0.242	0.956
CHEK1	FANCA	1859362	1857814	9606.ENSP00000388648	9606.ENSP00000373952	0	0	0	0	0.303	0	0.9	0.421	0.956
MAD1L1	CCNB1	1845817	1844435	9606.ENSP00000265854	9606.ENSP00000256442	0	0	0	0	0.062	0	0.9	0.574	0.956
PCNA	RAD51AP1	1856984	1843165	9606.ENSP00000368438	9606.ENSP00000228843	0	0	0	0	0.564	0	0.9	0.091	0.956
KIF2C	KIF22	1855643	1842279	9606.ENSP00000361298	9606.ENSP00000160827	0	0	0	0.66	0.532	0	0.9	0.37	0.956
CDCA8	MLF1IP	1849847	1846726	9606.ENSP00000316121	9606.ENSP00000281453	0	0	0	0	0.504	0	0.9	0.189	0.956
NCAPG2	PLK1	1853329	1848135	9606.ENSP00000348657	9606.ENSP00000300093	0	0	0	0	0.558	0	0.9	0.068	0.955
CDCA5	ESPL1	1846446	1844556	9606.ENSP00000275517	9606.ENSP00000257934	0	0	0	0	0.355	0	0.9	0.366	0.955
ZWINT	PLK1	1856020	1848135	9606.ENSP00000363055	9606.ENSP00000300093	0	0	0	0	0.441	0	0.9	0.259	0.955
TOP2A	AURKA	1860923	1842628	9606.ENSP00000411532	9606.ENSP00000216911	0	0	0	0	0.919	0	0	0.472	0.955
RACGAP1	CCNB1	1849236	1844435	9606.ENSP00000309871	9606.ENSP00000256442	0	0	0	0	0.936	0	0	0.329	0.955
BUB1	KIF23	1848415	1844781	9606.ENSP00000302530	9606.ENSP00000260363	0	0	0	0	0.922	0.197	0	0.343	0.955
CCNB1	DLGAP5	1844435	1843859	9606.ENSP00000256442	9606.ENSP00000247191	0	0	0	0	0.888	0	0	0.609	0.954
CCNA2	ORC6	1846354	1842721	9606.ENSP00000274026	9606.ENSP00000219097	0	0	0	0	0.453	0	0.9	0.231	0.954
CDK1	MAD1L1	1858283	1845817	9606.ENSP00000378699	9606.ENSP00000265854	0	0	0	0	0.059	0.061	0.9	0.549	0.954
SKA1	SPC25	1846949	1846768	9606.ENSP00000285116	9606.ENSP00000282074	0	0	0	0	0.534	0	0.9	0.108	0.954
CDK1	SKA1	1858283	1846949	9606.ENSP00000378699	9606.ENSP00000285116	0	0	0	0	0.559	0	0.9	0.054	0.954
MAD1L1	ESPL1	1845817	1844556	9606.ENSP00000265854	9606.ENSP00000257934	0	0	0	0	0.098	0	0.9	0.534	0.954
LMNB1	CCNB1	1844893	1844435	9606.ENSP00000261366	9606.ENSP00000256442	0	0	0	0	0.474	0	0.9	0.203	0.954
CENPP	CENPK	1856335	1843648	9606.ENSP00000364737	9606.ENSP00000242872	0	0	0	0	0.154	0	0.9	0.5	0.954
UBE2C	TYMS	1853360	1849803	9606.ENSP00000348838	9606.ENSP00000315644	0	0	0	0	0.774	0.774	0	0.171	0.954
PCNA	CDC25A	1856984	1848560	9606.ENSP00000368438	9606.ENSP00000303706	0	0	0	0	0.159	0	0.9	0.502	0.954
FANCA	UBE2T	1857814	1854557	9606.ENSP00000373952	9606.ENSP00000356243	0	0	0	0	0.183	0	0.9	0.49	0.954
PRC1	CCNB2	1858173	1847117	9606.ENSP00000377793	9606.ENSP00000288207	0	0	0	0	0.895	0.17	0	0.522	0.954
POLD1	MCM3	1860575	1843226	9606.ENSP00000406046	9606.ENSP00000229854	0	0	0	0	0.499	0.805	0	0.569	0.954
CENPN	NUF2	1858091	1846198	9606.ENSP00000377007	9606.ENSP00000271452	0	0	0	0	0.495	0	0.9	0.16	0.953
SKA1	NUF2	1846949	1846198	9606.ENSP00000285116	9606.ENSP00000271452	0	0	0	0	0.375	0	0.9	0.311	0.953
CEP55	KIF23	1855493	1844781	9606.ENSP00000360540	9606.ENSP00000260363	0	0	0	0	0.833	0.212	0	0.67	0.953
HIST1H2BK	HIST1H4J	1853439	1853135	9606.ENSP00000349430	9606.ENSP00000347168	0	0	0	0	0.268	0.866	0	0.56	0.953
TTK	SMC4	1855108	1852454	9606.ENSP00000358813	9606.ENSP00000341382	0	0	0	0	0.947	0.056	0	0.118	0.953
MCM2	LIG1	1845676	1845325	9606.ENSP00000265056	9606.ENSP00000263274	0	0	0	0	0.9	0	0	0.552	0.953
CDKN3	MAD2L1	1851839	1847745	9606.ENSP00000335357	9606.ENSP00000296509	0	0	0	0	0.876	0.354	0	0.461	0.953
MAD2L1	CENPH	1847745	1846827	9606.ENSP00000296509	9606.ENSP00000283006	0	0	0	0	0.479	0.094	0.9	0.127	0.953
KIF20A	AURKA	1858244	1842628	9606.ENSP00000378356	9606.ENSP00000216911	0	0	0	0	0.898	0.116	0	0.519	0.953
PFKP	PFKFB4	1857335	1843311	9606.ENSP00000370517	9606.ENSP00000232375	0.048	0	0	0	0.089	0.053	0.9	0.52	0.953
CENPK	OIP5	1843648	1842788	9606.ENSP00000242872	9606.ENSP00000220514	0	0	0	0	0.458	0	0.9	0.205	0.953
RHNO1	CHEK1	1862100	1859362	9606.ENSP00000438590	9606.ENSP00000388648	0	0	0	0	0.251	0	0.9	0.427	0.953
SPC24	KIF2C	1863909	1855643	9606.ENSP00000465075	9606.ENSP00000361298	0	0	0	0	0.232	0	0.9	0.44	0.953
CENPH	CCNB1	1846827	1844435	9606.ENSP00000283006	9606.ENSP00000256442	0	0	0	0	0.477	0	0.9	0.17	0.952
FEN1	MCM5	1848737	1842548	9606.ENSP00000305480	9606.ENSP00000216122	0	0	0	0	0.884	0.065	0	0.598	0.952
MAD1L1	AURKA	1845817	1842628	9606.ENSP00000265854	9606.ENSP00000216911	0	0	0	0	0.054	0.889	0	0.584	0.952
DHFR	GGH	1859928	1844755	9606.ENSP00000396308	9606.ENSP00000260118	0	0	0	0	0.136	0	0.9	0.491	0.952
E2F1	MCM3	1852951	1843226	9606.ENSP00000345571	9606.ENSP00000229854	0	0	0	0	0.314	0	0.9	0.359	0.952
PLK1	MYBL2	1848135	1842633	9606.ENSP00000300093	9606.ENSP00000217026	0	0	0	0	0.388	0	0.9	0.277	0.952
CENPP	CENPW	1856335	1854781	9606.ENSP00000364737	9606.ENSP00000357311	0	0	0	0	0.127	0	0.9	0.495	0.952
CCNB2	SKA1	1847117	1846949	9606.ENSP00000288207	9606.ENSP00000285116	0	0	0	0	0.516	0	0.9	0.069	0.951
ACTA1	PAK4	1854428	1853663	9606.ENSP00000355645	9606.ENSP00000351049	0	0	0	0	0.052	0.134	0.9	0.482	0.951
AURKB	CENPH	1863844	1846827	9606.ENSP00000463999	9606.ENSP00000283006	0	0	0	0	0.26	0	0.9	0.397	0.951
CDCA5	CENPM	1846446	1842528	9606.ENSP00000275517	9606.ENSP00000215980	0	0	0	0	0.462	0	0.9	0.173	0.951
FEN1	MCM2	1848737	1845676	9606.ENSP00000305480	9606.ENSP00000265056	0	0	0	0	0.873	0.065	0	0.626	0.951
RRM2	AK4	1854033	1850420	9606.ENSP00000353770	9606.ENSP00000322175	0	0	0	0	0.081	0	0.941	0.183	0.951
NUF2	ESPL1	1846198	1844556	9606.ENSP00000271452	9606.ENSP00000257934	0	0	0	0	0.329	0	0.9	0.33	0.951
RMI2	RAD51AP1	1849289	1843165	9606.ENSP00000310356	9606.ENSP00000228843	0	0	0	0	0.531	0	0.9	0	0.951
TOP2A	TTK	1860923	1855108	9606.ENSP00000411532	9606.ENSP00000358813	0	0	0	0	0.94	0	0	0.222	0.951
C19orf40	UBE2T	1863940	1854557	9606.ENSP00000466121	9606.ENSP00000356243	0	0	0	0	0	0	0.9	0.535	0.951
TOP2A	CHEK1	1860923	1859362	9606.ENSP00000411532	9606.ENSP00000388648	0	0	0	0	0.811	0.525	0	0.504	0.951
KIF23	CCNB1	1844781	1844435	9606.ENSP00000260363	9606.ENSP00000256442	0	0	0	0	0.92	0.123	0	0.352	0.951
CENPW	CENPK	1854781	1843648	9606.ENSP00000357311	9606.ENSP00000242872	0	0	0	0	0.097	0	0.9	0.506	0.951
CENPN	SKA1	1858091	1846949	9606.ENSP00000377007	9606.ENSP00000285116	0	0	0	0	0.39	0	0.9	0.248	0.95
AURKB	VIM	1863844	1842995	9606.ENSP00000463999	9606.ENSP00000224237	0	0	0	0	0.054	0	0.9	0.519	0.95
GMNN	ORC6	1843236	1842721	9606.ENSP00000230056	9606.ENSP00000219097	0	0	0	0	0.278	0	0.9	0.364	0.95
CCNF	FBXO2	1858453	1853030	9606.ENSP00000380256	9606.ENSP00000346240	0	0	0	0	0	0	0.9	0.527	0.95
CDK1	KIF20A	1858283	1858244	9606.ENSP00000378699	9606.ENSP00000378356	0	0	0	0	0.861	0.094	0	0.636	0.95
SPC24	PLK1	1863909	1848135	9606.ENSP00000465075	9606.ENSP00000300093	0	0	0	0	0.309	0	0.9	0.343	0.95
IFI6	ISG20	1852601	1848861	9606.ENSP00000342513	9606.ENSP00000306565	0	0	0	0	0.232	0	0.9	0.408	0.95
AURKB	MLF1IP	1863844	1846726	9606.ENSP00000463999	9606.ENSP00000281453	0	0	0	0	0.369	0	0.9	0.272	0.95
CALM3	KCNQ1	1847279	1842257	9606.ENSP00000291295	9606.ENSP00000155840	0	0	0	0	0	0.852	0	0.68	0.95
CBX3	H2AFZ	1851906	1847723	9606.ENSP00000336687	9606.ENSP00000296417	0	0	0	0	0.186	0	0.9	0.427	0.949
CENPW	CENPM	1854781	1842528	9606.ENSP00000357311	9606.ENSP00000215980	0	0	0	0	0.162	0	0.9	0.439	0.949
GMNN	MCM5	1843236	1842548	9606.ENSP00000230056	9606.ENSP00000216122	0	0	0	0	0.185	0	0.9	0.43	0.949
CDK1	CENPK	1858283	1843648	9606.ENSP00000378699	9606.ENSP00000242872	0	0	0	0	0.481	0	0.9	0.097	0.949
ISG20	IFI27	1848861	1848004	9606.ENSP00000306565	9606.ENSP00000298902	0	0	0	0	0.171	0	0.9	0.442	0.949
SPC24	CENPA	1863909	1851939	9606.ENSP00000465075	9606.ENSP00000336868	0	0	0	0	0.165	0	0.9	0.441	0.949
NPPA	GATA4	1856505	1851726	9606.ENSP00000365663	9606.ENSP00000334458	0	0	0	0	0	0	0.9	0.515	0.949
KIF11	KIF22	1844817	1842279	9606.ENSP00000260731	9606.ENSP00000160827	0	0	0	0.719	0.355	0.071	0.9	0.826	0.949
SPC24	CCNB1	1863909	1844435	9606.ENSP00000465075	9606.ENSP00000256442	0	0	0	0	0.359	0	0.9	0.277	0.949
PLK1	CENPM	1848135	1842528	9606.ENSP00000300093	9606.ENSP00000215980	0	0	0	0	0.452	0	0.9	0.152	0.949
TOP2A	NCAPH	1860923	1843566	9606.ENSP00000411532	9606.ENSP00000240423	0	0	0	0	0.87	0.174	0	0.566	0.949
CCNE1	CCNB1	1845190	1844435	9606.ENSP00000262643	9606.ENSP00000256442	0	0	0	0.676	0.348	0.071	0.9	0.725	0.949
BUB1B	NCAPG	1847075	1844063	9606.ENSP00000287598	9606.ENSP00000251496	0	0	0	0	0.937	0	0	0.223	0.949
CALM3	MYH14	1847279	1845102	9606.ENSP00000291295	9606.ENSP00000262269	0	0	0	0	0.053	0.397	0	0.916	0.948
E2F1	CDKN2C	1852951	1845196	9606.ENSP00000345571	9606.ENSP00000262662	0	0	0	0	0.096	0.36	0.9	0.218	0.948
PLK1	PLK4	1848135	1846179	9606.ENSP00000300093	9606.ENSP00000270861	0	0	0	0.733	0.326	0.135	0.9	0.72	0.948
NCAPG2	KIF23	1853329	1844781	9606.ENSP00000348657	9606.ENSP00000260363	0	0	0	0	0.948	0	0	0	0.948
CCNA2	CDK4	1846354	1844551	9606.ENSP00000274026	9606.ENSP00000257904	0	0.004	0	0	0.281	0.697	0	0.779	0.948
RACGAP1	KIF22	1849236	1842279	9606.ENSP00000309871	9606.ENSP00000160827	0	0	0	0	0.332	0.181	0.9	0.173	0.948
CHEK1	CCNB1	1859362	1844435	9606.ENSP00000388648	9606.ENSP00000256442	0	0	0	0	0.756	0.065	0	0.789	0.947
RACGAP1	CCNB2	1849236	1847117	9606.ENSP00000309871	9606.ENSP00000288207	0	0	0	0	0.926	0	0	0.307	0.947
BUB1B	KIF11	1847075	1844817	9606.ENSP00000287598	9606.ENSP00000260731	0	0	0	0	0.865	0.178	0	0.561	0.947
CHEK1	ORC6	1859362	1842721	9606.ENSP00000388648	9606.ENSP00000219097	0	0	0	0	0.385	0	0.9	0.21	0.947
CCNB2	CENPH	1847117	1846827	9606.ENSP00000288207	9606.ENSP00000283006	0	0	0	0	0.454	0	0.9	0.107	0.947
KIF4A	KIF22	1856112	1842279	9606.ENSP00000363524	9606.ENSP00000160827	0	0	0	0.728	0.379	0.111	0.9	0.482	0.947
TOP2A	NEK2	1860923	1854493	9606.ENSP00000411532	9606.ENSP00000355966	0	0	0	0	0.811	0.658	0	0.257	0.947
CHEK1	UBE2T	1859362	1854557	9606.ENSP00000388648	9606.ENSP00000356243	0	0	0	0	0.401	0.119	0.9	0.117	0.947
CCNB1	ORC6	1844435	1842721	9606.ENSP00000256442	9606.ENSP00000219097	0	0	0	0	0.341	0	0.9	0.245	0.946
RAD51	CDK4	1857551	1844551	9606.ENSP00000372088	9606.ENSP00000257904	0	0	0	0	0.161	0.119	0.9	0.361	0.946
SKA1	CCNB1	1846949	1844435	9606.ENSP00000285116	9606.ENSP00000256442	0	0	0	0	0.435	0	0.9	0.121	0.946
CDK1	CCNE1	1858283	1845190	9606.ENSP00000378699	9606.ENSP00000262643	0	0	0	0	0.208	0.771	0	0.725	0.946
TOP2A	CDC25A	1860923	1848560	9606.ENSP00000411532	9606.ENSP00000303706	0	0	0	0	0.295	0	0.9	0.3	0.946
PCNA	CCNB1	1856984	1844435	9606.ENSP00000368438	9606.ENSP00000256442	0	0	0	0	0.75	0.36	0	0.688	0.946
TOP2A	CCNB1	1860923	1844435	9606.ENSP00000411532	9606.ENSP00000256442	0	0	0	0	0.867	0.054	0	0.606	0.946
CENPW	CENPA	1854781	1851939	9606.ENSP00000357311	9606.ENSP00000336868	0	0	0	0	0.142	0	0.9	0.41	0.945
CDC20	CDC6	1849070	1842453	9606.ENSP00000308450	9606.ENSP00000209728	0	0	0	0	0.552	0.669	0	0.661	0.945
KIF20A	KIF22	1858244	1842279	9606.ENSP00000378356	9606.ENSP00000160827	0	0	0	0.639	0.428	0	0.9	0.272	0.945
TTK	CCNB2	1855108	1847117	9606.ENSP00000358813	9606.ENSP00000288207	0	0	0	0	0.851	0.511	0	0.316	0.945
CDK1	DLGAP5	1858283	1843859	9606.ENSP00000378699	9606.ENSP00000247191	0	0	0	0	0.894	0.307	0	0.308	0.945
CDK1	CENPH	1858283	1846827	9606.ENSP00000378699	9606.ENSP00000283006	0	0	0	0	0.398	0	0.9	0.159	0.945
CCNF	UBE2C	1858453	1853360	9606.ENSP00000380256	9606.ENSP00000348838	0	0	0	0	0.362	0	0.9	0.213	0.945
E2F1	CDC25A	1852951	1848560	9606.ENSP00000345571	9606.ENSP00000303706	0	0	0	0	0.17	0	0.9	0.396	0.945
ISG20	OAS3	1848861	1843172	9606.ENSP00000306565	9606.ENSP00000228928	0	0	0	0	0.188	0	0.9	0.379	0.945
TOP2A	CCNB2	1860923	1847117	9606.ENSP00000411532	9606.ENSP00000288207	0	0	0	0	0.877	0.054	0	0.568	0.945
CDC20	CDC34	1849070	1842491	9606.ENSP00000308450	9606.ENSP00000215574	0	0	0	0	0.062	0.184	0.9	0.375	0.945
TTK	CCNB1	1855108	1844435	9606.ENSP00000358813	9606.ENSP00000256442	0	0	0	0	0.843	0.511	0	0.346	0.945
AURKB	TOP2A	1863844	1860923	9606.ENSP00000463999	9606.ENSP00000411532	0	0	0	0	0.903	0	0	0.465	0.945
SPC24	MAD2L1	1863909	1847745	9606.ENSP00000465075	9606.ENSP00000296509	0	0	0	0	0.394	0	0.9	0.151	0.944
PTTG1	BUB1B	1852874	1847075	9606.ENSP00000344936	9606.ENSP00000287598	0	0	0	0	0.74	0.324	0	0.708	0.944
CCNB1	CENPK	1844435	1843648	9606.ENSP00000256442	9606.ENSP00000242872	0	0	0	0	0.464	0	0.9	0.041	0.944
AURKB	CDC45	1863844	1860553	9606.ENSP00000463999	9606.ENSP00000405726	0	0	0	0	0.921	0	0	0.322	0.944
CDKN3	CCNA2	1851839	1846354	9606.ENSP00000335357	9606.ENSP00000274026	0	0	0	0	0.878	0.178	0	0.493	0.944
KIF11	DLGAP5	1844817	1843859	9606.ENSP00000260731	9606.ENSP00000247191	0	0	0	0	0.897	0.054	0	0.476	0.944
CENPW	MLF1IP	1854781	1846726	9606.ENSP00000357311	9606.ENSP00000281453	0	0	0	0	0.073	0	0.9	0.448	0.944
TOP2A	MAD2L1	1860923	1847745	9606.ENSP00000411532	9606.ENSP00000296509	0	0	0	0	0.915	0	0	0.37	0.944
MLF1IP	CDCA5	1846726	1846446	9606.ENSP00000281453	9606.ENSP00000275517	0	0	0	0	0.461	0	0.9	0	0.943
TPX2	DLGAP5	1848175	1843859	9606.ENSP00000300403	9606.ENSP00000247191	0	0	0	0	0.866	0	0	0.596	0.943
CDKN3	AURKA	1851839	1842628	9606.ENSP00000335357	9606.ENSP00000216911	0	0	0	0	0.873	0.295	0	0.416	0.943
CDK1	RACGAP1	1858283	1849236	9606.ENSP00000378699	9606.ENSP00000309871	0	0	0	0	0.863	0.359	0	0.404	0.943
BUB1B	CENPK	1847075	1843648	9606.ENSP00000287598	9606.ENSP00000242872	0	0	0	0	0.385	0	0.9	0.16	0.943
FEN1	MCM3	1848737	1843226	9606.ENSP00000305480	9606.ENSP00000229854	0	0	0	0	0.872	0.065	0	0.567	0.943
SPC24	CENPN	1863909	1858091	9606.ENSP00000465075	9606.ENSP00000377007	0	0	0	0	0.227	0	0.9	0.31	0.942
RAD51	POLE2	1857551	1842589	9606.ENSP00000372088	9606.ENSP00000216367	0	0	0	0	0.408	0	0.9	0.11	0.942
SPC24	CENPK	1863909	1843648	9606.ENSP00000465075	9606.ENSP00000242872	0	0	0	0	0.202	0	0.9	0.34	0.942
SPC25	CENPM	1846768	1842528	9606.ENSP00000282074	9606.ENSP00000215980	0	0	0	0	0.442	0	0.9	0.048	0.942
SHCBP1	KIF23	1848847	1844781	9606.ENSP00000306473	9606.ENSP00000260363	0	0	0	0	0.714	0.774	0	0.184	0.942
CENPN	PLK1	1858091	1848135	9606.ENSP00000377007	9606.ENSP00000300093	0	0	0	0	0.38	0	0.9	0.147	0.942
CDK1	TYMS	1858283	1849803	9606.ENSP00000378699	9606.ENSP00000315644	0	0	0	0	0.914	0	0	0.341	0.941
PTTG1	BUB1	1852874	1848415	9606.ENSP00000344936	9606.ENSP00000302530	0	0	0	0	0.84	0	0	0.65	0.941
SPC25	ESPL1	1846768	1844556	9606.ENSP00000282074	9606.ENSP00000257934	0	0	0	0	0.413	0	0.9	0.079	0.941
CDK1	MCM3	1858283	1843226	9606.ENSP00000378699	9606.ENSP00000229854	0	0	0	0	0.728	0.139	0	0.768	0.941
CBX4	CBX8	1846093	1846089	9606.ENSP00000269397	9606.ENSP00000269385	0	0	0	0.728	0.054	0.336	0.9	0.551	0.941
KIF20A	CCNB2	1858244	1847117	9606.ENSP00000378356	9606.ENSP00000288207	0	0	0	0	0.905	0.123	0	0.352	0.941
PLK1	SPC25	1848135	1846768	9606.ENSP00000300093	9606.ENSP00000282074	0	0	0	0	0.408	0	0.9	0.093	0.941
TOP2A	UBE2C	1860923	1853360	9606.ENSP00000411532	9606.ENSP00000348838	0	0	0	0	0.91	0	0	0.379	0.941
DHFR	E2F1	1859928	1852951	9606.ENSP00000396308	9606.ENSP00000345571	0	0	0	0	0.111	0	0.9	0.389	0.941
CDC20	MLF1IP	1849070	1846726	9606.ENSP00000308450	9606.ENSP00000281453	0	0	0	0	0.349	0	0.9	0.173	0.941
NUF2	CENPM	1846198	1842528	9606.ENSP00000271452	9606.ENSP00000215980	0	0	0	0	0.332	0	0.9	0.187	0.94
KCNH2	KCNQ1	1845083	1842257	9606.ENSP00000262186	9606.ENSP00000155840	0	0	0	0	0	0.101	0	0.936	0.94
STMN1	CCNB1	1860849	1844435	9606.ENSP00000410452	9606.ENSP00000256442	0	0	0	0	0.244	0	0.9	0.273	0.94
CDK1	CEP55	1858283	1855493	9606.ENSP00000378699	9606.ENSP00000360540	0	0	0	0	0.873	0.324	0	0.361	0.94
SPC25	CDCA5	1846768	1846446	9606.ENSP00000282074	9606.ENSP00000275517	0	0	0	0	0.26	0	0.9	0.251	0.939
XAF1	ISG20	1854224	1848861	9606.ENSP00000354822	9606.ENSP00000306565	0	0	0	0	0.174	0	0.9	0.321	0.939
CCNA2	KIF23	1846354	1844781	9606.ENSP00000274026	9606.ENSP00000260363	0	0	0	0	0.902	0.123	0	0.351	0.939
HJURP	CENPW	1861060	1854781	9606.ENSP00000414109	9606.ENSP00000357311	0	0	0	0	0.11	0	0.9	0.373	0.939
TOP2A	CCNA2	1860923	1846354	9606.ENSP00000411532	9606.ENSP00000274026	0	0	0	0	0.888	0.054	0	0.474	0.939
NUF2	KIF11	1846198	1844817	9606.ENSP00000271452	9606.ENSP00000260731	0	0	0	0	0.84	0.166	0	0.581	0.939
REC8	ESPL1	1849097	1844556	9606.ENSP00000308699	9606.ENSP00000257934	0	0	0	0	0.285	0.097	0.8	0.585	0.939
PRC1	CCNA2	1858173	1846354	9606.ENSP00000377793	9606.ENSP00000274026	0	0	0	0	0.861	0.411	0	0.322	0.939
RMI2	POLE2	1849289	1842589	9606.ENSP00000310356	9606.ENSP00000216367	0	0	0	0	0.411	0	0.9	0	0.938
ANLN	KIF23	1845802	1844781	9606.ENSP00000265748	9606.ENSP00000260363	0	0	0	0	0.828	0	0	0.654	0.938
BUB1	NCAPG	1848415	1844063	9606.ENSP00000302530	9606.ENSP00000251496	0	0	0	0	0.92	0	0	0.26	0.938
CCNF	CDC34	1858453	1842491	9606.ENSP00000380256	9606.ENSP00000215574	0	0	0	0	0.06	0.182	0.9	0.295	0.938
CDC20	CENPH	1849070	1846827	9606.ENSP00000308450	9606.ENSP00000283006	0	0	0	0	0.213	0	0.9	0.277	0.938
CDC45	AURKA	1860553	1842628	9606.ENSP00000405726	9606.ENSP00000216911	0	0	0	0	0.927	0	0	0.184	0.938
CDCA5	CENPK	1846446	1843648	9606.ENSP00000275517	9606.ENSP00000242872	0	0	0	0	0.382	0	0.9	0.087	0.938
RRM2	CCNB1	1854033	1844435	9606.ENSP00000353770	9606.ENSP00000256442	0	0	0	0	0.909	0	0	0.35	0.938
SKA1	CENPH	1846949	1846827	9606.ENSP00000285116	9606.ENSP00000283006	0	0	0	0	0.174	0	0.9	0.315	0.938
BUB1	CCNA2	1848415	1846354	9606.ENSP00000302530	9606.ENSP00000274026	0	0	0	0	0.883	0.087	0	0.469	0.938
RRM2	CCNB2	1854033	1847117	9606.ENSP00000353770	9606.ENSP00000288207	0	0	0	0	0.899	0	0	0.406	0.937
KIF20A	CCNB1	1858244	1844435	9606.ENSP00000378356	9606.ENSP00000256442	0	0	0	0	0.898	0.123	0	0.351	0.937
PTTG1	CCNB2	1852874	1847117	9606.ENSP00000344936	9606.ENSP00000288207	0	0	0	0	0.891	0	0	0.443	0.937
PRC1	NCAPG	1858173	1844063	9606.ENSP00000377793	9606.ENSP00000251496	0	0	0	0	0.926	0	0	0.187	0.937
CDC45	CCNB2	1860553	1847117	9606.ENSP00000405726	9606.ENSP00000288207	0	0	0	0	0.872	0.066	0	0.518	0.937
SKA1	ESPL1	1846949	1844556	9606.ENSP00000285116	9606.ENSP00000257934	0	0	0	0	0.35	0	0.9	0.117	0.937
CDC45	CDK1	1860553	1858283	9606.ENSP00000405726	9606.ENSP00000378699	0	0	0	0	0.817	0	0	0.671	0.937
E2F1	TK1	1852951	1848315	9606.ENSP00000345571	9606.ENSP00000301634	0	0	0	0	0.312	0	0.9	0.159	0.937
TOP2A	ASPM	1860923	1854584	9606.ENSP00000411532	9606.ENSP00000356379	0	0	0	0	0.932	0	0	0.113	0.937
ZWINT	CENPK	1856020	1843648	9606.ENSP00000363055	9606.ENSP00000242872	0	0	0	0	0.31	0	0.9	0.171	0.937
SPC24	CENPM	1863909	1842528	9606.ENSP00000465075	9606.ENSP00000215980	0	0	0	0	0.259	0	0.9	0.206	0.936
CCNE1	ORC6	1845190	1842721	9606.ENSP00000262643	9606.ENSP00000219097	0	0	0	0	0.3	0	0.9	0.164	0.936
CDCA8	CENPK	1849847	1843648	9606.ENSP00000316121	9606.ENSP00000242872	0	0	0	0	0.312	0	0.9	0.147	0.936
HIST1H3H	HIST1H2AE	1854968	1848523	9606.ENSP00000358160	9606.ENSP00000303373	0	0	0	0	0.743	0.394	0	0.625	0.936
ORC6	POLE2	1842721	1842589	9606.ENSP00000219097	9606.ENSP00000216367	0	0	0	0	0.357	0	0.9	0.083	0.936
PCNA	RMI2	1856984	1849289	9606.ENSP00000368438	9606.ENSP00000310356	0	0	0	0	0.356	0	0.9	0.089	0.936
PLK1	SKA1	1848135	1846949	9606.ENSP00000300093	9606.ENSP00000285116	0	0	0	0	0.335	0	0.9	0.126	0.936
ASPM	NCAPG	1854584	1844063	9606.ENSP00000356379	9606.ENSP00000251496	0	0	0	0	0.932	0	0	0.097	0.936
TOP2A	KIF11	1860923	1844817	9606.ENSP00000411532	9606.ENSP00000260731	0	0	0	0	0.902	0	0	0.359	0.935
PRC1	CDC20	1858173	1849070	9606.ENSP00000377793	9606.ENSP00000308450	0	0	0	0	0.901	0	0	0.37	0.935
SNRPB	MAGOHB	1860980	1850128	9606.ENSP00000412566	9606.ENSP00000319240	0	0	0	0	0.351	0	0.9	0.084	0.935
SPC24	CCNB2	1863909	1847117	9606.ENSP00000465075	9606.ENSP00000288207	0	0	0	0	0.291	0	0.9	0.165	0.935
CDK1	ANLN	1858283	1845802	9606.ENSP00000378699	9606.ENSP00000265748	0	0	0	0	0.854	0	0	0.578	0.935
CDKN2A	CDKN2C	1859838	1845196	9606.ENSP00000394932	9606.ENSP00000262662	0	0	0	0.821	0	0.285	0.9	0.742	0.935
SKA1	CENPM	1846949	1842528	9606.ENSP00000285116	9606.ENSP00000215980	0	0	0	0	0.316	0	0.9	0.127	0.935
PLK1	CENPH	1848135	1846827	9606.ENSP00000300093	9606.ENSP00000283006	0	0	0	0	0.219	0	0.9	0.24	0.935
HMMR	BUB1	1858139	1848415	9606.ENSP00000377492	9606.ENSP00000302530	0	0	0	0	0.867	0	0	0.531	0.935
TYMS	MCM2	1849803	1845676	9606.ENSP00000315644	9606.ENSP00000265056	0	0	0	0	0.922	0	0	0.203	0.935
ASPM	NDC80	1854584	1844946	9606.ENSP00000356379	9606.ENSP00000261597	0	0	0	0	0.932	0	0	0.06	0.934
TOP2A	KIAA0101	1860923	1848123	9606.ENSP00000411532	9606.ENSP00000300035	0	0	0	0	0.926	0	0	0.145	0.934
POLD1	ISG15	1860575	1857024	9606.ENSP00000406046	9606.ENSP00000368699	0	0	0	0	0.042	0	0.9	0.367	0.934
MAD2L1	PLK4	1847745	1846179	9606.ENSP00000296509	9606.ENSP00000270861	0	0	0	0	0.83	0.17	0	0.574	0.934
CDKN3	CDC20	1851839	1849070	9606.ENSP00000335357	9606.ENSP00000308450	0	0	0	0	0.825	0.146	0	0.598	0.934
CENPP	NDC80	1856335	1844946	9606.ENSP00000364737	9606.ENSP00000261597	0	0	0	0	0.176	0	0.9	0.266	0.934
H2AFZ	LMNB1	1847723	1844893	9606.ENSP00000296417	9606.ENSP00000261366	0	0	0	0	0.119	0.065	0.9	0.3	0.934
TTK	NUF2	1855108	1846198	9606.ENSP00000358813	9606.ENSP00000271452	0	0	0	0	0.828	0.473	0	0.323	0.933
KIFC1	KIF4A	1859761	1856112	9606.ENSP00000393963	9606.ENSP00000363524	0	0	0	0.696	0.167	0.171	0.9	0.407	0.933
AURKB	KIF4A	1863844	1856112	9606.ENSP00000463999	9606.ENSP00000363524	0	0	0	0	0.86	0.116	0	0.502	0.933
CDCA8	CENPH	1849847	1846827	9606.ENSP00000316121	9606.ENSP00000283006	0	0	0	0	0.269	0	0.9	0.166	0.933
CENPH	CDCA5	1846827	1846446	9606.ENSP00000283006	9606.ENSP00000275517	0	0	0	0	0.365	0	0.9	0	0.933
PCNA	TRAIP	1856984	1851007	9606.ENSP00000368438	9606.ENSP00000328203	0	0	0	0	0.147	0.866	0	0.457	0.933
CENPN	ESPL1	1858091	1844556	9606.ENSP00000377007	9606.ENSP00000257934	0	0	0	0	0.336	0	0.9	0.074	0.933
ESPL1	CENPM	1844556	1842528	9606.ENSP00000257934	9606.ENSP00000215980	0	0	0	0	0.354	0	0.9	0	0.932
CENPA	NCAPG	1851939	1844063	9606.ENSP00000336868	9606.ENSP00000251496	0	0	0	0	0.862	0.053	0	0.522	0.932
KIF11	MCM5	1844817	1842548	9606.ENSP00000260731	9606.ENSP00000216122	0	0	0	0	0.921	0	0	0.171	0.932
MAD2L1	NCAPG	1847745	1844063	9606.ENSP00000296509	9606.ENSP00000251496	0	0	0	0	0.915	0	0	0.24	0.932
SPC25	MLF1IP	1846768	1846726	9606.ENSP00000282074	9606.ENSP00000281453	0	0	0	0	0.313	0	0.9	0.091	0.932
TOP2A	E2F1	1860923	1852951	9606.ENSP00000411532	9606.ENSP00000345571	0	0	0	0	0.231	0	0.9	0.181	0.931
FOXM1	CDC20	1852579	1849070	9606.ENSP00000342307	9606.ENSP00000308450	0	0	0	0	0.844	0	0	0.577	0.931
KIFC1	KIF2C	1859761	1855643	9606.ENSP00000393963	9606.ENSP00000361298	0	0	0	0.649	0.164	0	0.9	0.634	0.931
KIF11	ESPL1	1844817	1844556	9606.ENSP00000260731	9606.ENSP00000257934	0	0	0	0	0.809	0.181	0	0.594	0.931
LIG1	NDC80	1845325	1844946	9606.ENSP00000263274	9606.ENSP00000261597	0	0	0	0	0.928	0	0	0.082	0.931
KIF23	AURKA	1844781	1842628	9606.ENSP00000260363	9606.ENSP00000216911	0	0	0	0	0.81	0.116	0	0.625	0.931
ZWINT	SKA1	1856020	1846949	9606.ENSP00000363055	9606.ENSP00000285116	0	0	0	0	0.185	0	0.9	0.226	0.931
CCNA2	KIF11	1846354	1844817	9606.ENSP00000274026	9606.ENSP00000260731	0	0	0	0	0.888	0.123	0	0.343	0.93
CCNA2	GMNN	1846354	1843236	9606.ENSP00000274026	9606.ENSP00000230056	0	0	0	0	0.588	0.774	0	0.308	0.93
ACTA1	GATA4	1854428	1851726	9606.ENSP00000355645	9606.ENSP00000334458	0	0	0	0	0	0.071	0.9	0.308	0.93
RAN	TPX2	1857999	1848175	9606.ENSP00000376176	9606.ENSP00000300403	0	0	0	0	0.118	0	0.9	0.275	0.93
HJURP	CENPK	1861060	1843648	9606.ENSP00000414109	9606.ENSP00000242872	0	0	0	0	0.206	0	0.9	0.195	0.93
CENPN	H2AFZ	1858091	1847723	9606.ENSP00000377007	9606.ENSP00000296417	0	0	0	0	0.318	0	0.9	0.059	0.93
CCNA2	AURKA	1846354	1842628	9606.ENSP00000274026	9606.ENSP00000216911	0	0	0	0	0.871	0.118	0	0.432	0.93
SKA1	CDCA5	1846949	1846446	9606.ENSP00000285116	9606.ENSP00000275517	0	0	0	0	0.329	0	0.9	0	0.93
HIST1H3H	HIST1H2BK	1854968	1853439	9606.ENSP00000358160	9606.ENSP00000349430	0	0	0	0	0.413	0.462	0.54	0.579	0.93
KIF2C	TPX2	1855643	1848175	9606.ENSP00000361298	9606.ENSP00000300403	0	0	0	0	0.866	0	0	0.496	0.93
CCNB2	MAD1L1	1847117	1845817	9606.ENSP00000288207	9606.ENSP00000265854	0	0	0	0	0.062	0	0.9	0.321	0.93
PRC1	MAD2L1	1858173	1847745	9606.ENSP00000377793	9606.ENSP00000296509	0	0	0	0	0.849	0.176	0	0.477	0.929
CDK1	EXO1	1858283	1849472	9606.ENSP00000378699	9606.ENSP00000311873	0	0	0	0	0.862	0.17	0	0.429	0.929
RRM2	CCNA2	1854033	1846354	9606.ENSP00000353770	9606.ENSP00000274026	0	0	0	0	0.891	0	0	0.378	0.929
CENPP	NUF2	1856335	1846198	9606.ENSP00000364737	9606.ENSP00000271452	0	0	0	0	0.208	0	0.9	0.182	0.929
CENPW	OIP5	1854781	1842788	9606.ENSP00000357311	9606.ENSP00000220514	0	0	0	0	0.246	0	0.9	0.143	0.929
CENPA	ASF1B	1851939	1845347	9606.ENSP00000336868	9606.ENSP00000263382	0	0	0	0	0.636	0.601	0	0.554	0.929
RASGRF1	CHEK1	1860566	1859362	9606.ENSP00000405963	9606.ENSP00000388648	0	0	0	0	0	0.325	0.9	0	0.929
H2AFZ	OIP5	1847723	1842788	9606.ENSP00000296417	9606.ENSP00000220514	0	0	0	0	0.326	0	0.9	0	0.929
BUB1	DLGAP5	1848415	1843859	9606.ENSP00000302530	9606.ENSP00000247191	0	0	0	0	0.893	0	0	0.37	0.929
KIF2C	CENPK	1855643	1843648	9606.ENSP00000361298	9606.ENSP00000242872	0	0	0	0	0.209	0	0.9	0.182	0.929
PCNA	CDC20	1856984	1849070	9606.ENSP00000368438	9606.ENSP00000308450	0	0	0	0	0.351	0.774	0	0.556	0.929
CCNB2	CENPK	1847117	1843648	9606.ENSP00000288207	9606.ENSP00000242872	0	0	0	0	0.291	0	0.9	0.078	0.929
CDC25C	CDC25A	1850370	1848560	9606.ENSP00000321656	9606.ENSP00000303706	0	0	0	0.843	0.234	0	0.9	0.788	0.929
AURKB	STMN1	1863844	1860849	9606.ENSP00000463999	9606.ENSP00000410452	0	0	0	0	0.176	0	0.9	0.205	0.928
CDK4	CDC6	1844551	1842453	9606.ENSP00000257904	9606.ENSP00000209728	0	0	0	0	0.161	0.701	0	0.737	0.928
KIF20A	NCAPG2	1858244	1853329	9606.ENSP00000378356	9606.ENSP00000348657	0	0	0	0	0.928	0	0	0	0.928
PRC1	PLK1	1858173	1848135	9606.ENSP00000377793	9606.ENSP00000300093	0	0	0	0	0.568	0.36	0	0.76	0.928
CENPN	SPC25	1858091	1846768	9606.ENSP00000377007	9606.ENSP00000282074	0	0	0	0	0.313	0	0.9	0	0.928
CDC25C	CDC20	1850370	1849070	9606.ENSP00000321656	9606.ENSP00000308450	0	0	0	0	0.513	0.669	0	0.592	0.928
CENPP	CCNB1	1856335	1844435	9606.ENSP00000364737	9606.ENSP00000256442	0	0	0	0	0.305	0	0.9	0.051	0.928
RAD51	FANCD2	1857551	1847078	9606.ENSP00000372088	9606.ENSP00000287647	0	0	0	0	0.316	0.36	0	0.849	0.928
H2AFZ	MLF1IP	1847723	1846726	9606.ENSP00000296417	9606.ENSP00000281453	0	0	0	0	0.305	0	0.9	0.057	0.928
SMC4	H2AFZ	1852454	1847723	9606.ENSP00000341382	9606.ENSP00000296417	0	0	0	0	0.185	0.095	0.9	0.145	0.928
TRIM50	UBE2S	1850979	1845564	9606.ENSP00000327994	9606.ENSP00000264552	0	0	0	0	0	0	0.9	0.311	0.928
HIST1H2AE	H2AFZ	1848523	1847723	9606.ENSP00000303373	9606.ENSP00000296417	0	0	0	0.955	0.12	0.919	0	0.681	0.928
SNRPB	CTNNBL1	1860980	1854287	9606.ENSP00000412566	9606.ENSP00000355050	0	0	0	0	0.171	0	0.9	0.206	0.928
AURKB	CENPP	1863844	1856335	9606.ENSP00000463999	9606.ENSP00000364737	0	0	0	0	0.209	0	0.9	0.154	0.927
CDKN3	PLK1	1851839	1848135	9606.ENSP00000335357	9606.ENSP00000300093	0	0	0	0	0.586	0.541	0	0.649	0.927
CCNB2	DLGAP5	1847117	1843859	9606.ENSP00000288207	9606.ENSP00000247191	0	0	0	0	0.891	0	0	0.358	0.927
SPC24	MLF1IP	1863909	1846726	9606.ENSP00000465075	9606.ENSP00000281453	0	0	0	0	0.11	0	0.9	0.251	0.927
CENPA	CCNA2	1851939	1846354	9606.ENSP00000336868	9606.ENSP00000274026	0	0	0	0	0.854	0.129	0	0.474	0.927
CCNE1	PKMYT1	1845190	1845109	9606.ENSP00000262643	9606.ENSP00000262300	0	0	0	0	0.211	0	0.9	0.153	0.927
CDK1	CDK4	1858283	1844551	9606.ENSP00000378699	9606.ENSP00000257904	0	0	0.519	0.916	0.168	0.096	0.9	0.93	0.927
AURKB	CCNA2	1863844	1846354	9606.ENSP00000463999	9606.ENSP00000274026	0	0	0	0	0.86	0.118	0	0.456	0.927
CENPP	CDC20	1856335	1849070	9606.ENSP00000364737	9606.ENSP00000308450	0	0	0	0	0.238	0	0.9	0.121	0.927
CENPP	MAD2L1	1856335	1847745	9606.ENSP00000364737	9606.ENSP00000296509	0	0	0	0	0.304	0	0.9	0	0.927
CDC45	BUB1	1860553	1848415	9606.ENSP00000405726	9606.ENSP00000302530	0	0	0	0	0.894	0.054	0	0.332	0.927
ANLN	DLGAP5	1845802	1843859	9606.ENSP00000265748	9606.ENSP00000247191	0	0	0	0	0.899	0	0	0.298	0.926
SPC24	ESPL1	1863909	1844556	9606.ENSP00000465075	9606.ENSP00000257934	0	0	0	0	0.205	0	0.9	0.148	0.926
PBK	MAD2L1	1848348	1847745	9606.ENSP00000301905	9606.ENSP00000296509	0	0	0	0	0.909	0.096	0	0.173	0.926
AURKB	CENPK	1863844	1843648	9606.ENSP00000463999	9606.ENSP00000242872	0	0	0	0	0.205	0	0.9	0.148	0.926
TTK	ASPM	1855108	1854584	9606.ENSP00000358813	9606.ENSP00000356379	0	0	0	0	0.925	0	0	0.051	0.926
CCNF	CDK1	1858453	1858283	9606.ENSP00000380256	9606.ENSP00000378699	0	0	0	0	0.381	0.698	0	0.64	0.926
ASPM	BUB1	1854584	1848415	9606.ENSP00000356379	9606.ENSP00000302530	0	0	0	0	0.92	0	0	0.112	0.926
H2AFZ	CDK4	1847723	1844551	9606.ENSP00000296417	9606.ENSP00000257904	0	0	0	0	0.159	0.099	0.9	0.143	0.926
PBK	CCNB2	1848348	1847117	9606.ENSP00000301905	9606.ENSP00000288207	0	0	0	0	0.901	0.12	0	0.215	0.925
CHEK1	CCNA2	1859362	1846354	9606.ENSP00000388648	9606.ENSP00000274026	0	0	0	0	0.864	0.062	0	0.46	0.925
CDC20	CENPK	1849070	1843648	9606.ENSP00000308450	9606.ENSP00000242872	0	0	0	0	0.211	0	0.9	0.128	0.925
KIF23	KIF22	1844781	1842279	9606.ENSP00000260363	9606.ENSP00000160827	0	0	0	0.636	0.203	0	0.9	0.318	0.925
BUB1	MELK	1848415	1847923	9606.ENSP00000302530	9606.ENSP00000298048	0	0	0	0	0.886	0.054	0	0.356	0.925
PLK1	H2AFZ	1848135	1847723	9606.ENSP00000300093	9606.ENSP00000296417	0	0	0	0	0.192	0	0.9	0.153	0.925
CDC20	TPX2	1849070	1848175	9606.ENSP00000308450	9606.ENSP00000300403	0	0	0	0	0.883	0	0	0.391	0.925
CKS1B	CDK4	1849378	1844551	9606.ENSP00000311083	9606.ENSP00000257904	0	0	0	0	0.377	0.667	0	0.671	0.925
CHEK1	CDK1	1859362	1858283	9606.ENSP00000388648	9606.ENSP00000378699	0	0	0.399	0.75	0.834	0.377	0	0.925	0.925
TRAIP	CDC20	1851007	1849070	9606.ENSP00000328203	9606.ENSP00000308450	0	0	0	0	0.279	0	0.9	0.049	0.925
UBE2C	H2AFZ	1853360	1847723	9606.ENSP00000348838	9606.ENSP00000296417	0	0	0	0	0.265	0	0.9	0.068	0.925
BUB1	TPX2	1848415	1848175	9606.ENSP00000302530	9606.ENSP00000300403	0	0	0	0	0.878	0	0	0.414	0.925
MAD2L1	SKA1	1847745	1846949	9606.ENSP00000296509	9606.ENSP00000285116	0	0	0	0	0.281	0	0.9	0.052	0.925
ARHGAP11A	RHOF	1854297	1845928	9606.ENSP00000355090	9606.ENSP00000267205	0	0	0	0	0.042	0.187	0.9	0.155	0.925
CENPP	BUB1	1856335	1848415	9606.ENSP00000364737	9606.ENSP00000302530	0	0	0	0	0.207	0	0.9	0.138	0.925
TOP2A	PBK	1860923	1848348	9606.ENSP00000411532	9606.ENSP00000301905	0	0	0	0	0.879	0	0	0.406	0.925
CDC25A	ORC6	1848560	1842721	9606.ENSP00000303706	9606.ENSP00000219097	0	0	0	0	0.165	0	0.9	0.167	0.924
KIF20A	TPX2	1858244	1848175	9606.ENSP00000378356	9606.ENSP00000300403	0	0	0	0	0.879	0	0	0.397	0.924
CHEK1	CDT1	1859362	1848231	9606.ENSP00000388648	9606.ENSP00000301019	0	0	0	0	0.765	0	0	0.689	0.924
UBE2C	CCNB2	1853360	1847117	9606.ENSP00000348838	9606.ENSP00000288207	0	0	0	0	0.862	0	0	0.468	0.924
PLK1	CENPK	1848135	1843648	9606.ENSP00000300093	9606.ENSP00000242872	0	0	0	0	0.196	0	0.9	0.14	0.924
TNFSF13B	TNFRSF12A	1856399	1850864	9606.ENSP00000365048	9606.ENSP00000326737	0	0	0	0	0	0	0.9	0.273	0.924
CENPH	ESPL1	1846827	1844556	9606.ENSP00000283006	9606.ENSP00000257934	0	0	0	0	0.16	0	0.9	0.173	0.924
CKS2	TTK	1856383	1855108	9606.ENSP00000364976	9606.ENSP00000358813	0	0	0	0	0.74	0.672	0	0.183	0.924
CEP55	DLGAP5	1855493	1843859	9606.ENSP00000360540	9606.ENSP00000247191	0	0	0	0	0.883	0	0	0.38	0.924
UBE2C	TRAIP	1853360	1851007	9606.ENSP00000348838	9606.ENSP00000328203	0	0	0	0	0.242	0	0.9	0.079	0.924
CHEK1	BUB1	1859362	1848415	9606.ENSP00000388648	9606.ENSP00000302530	0	0	0	0	0.852	0.064	0	0.493	0.923
SNRPB	POLR2D	1860980	1846274	9606.ENSP00000412566	9606.ENSP00000272645	0	0	0	0	0.194	0.12	0.9	0	0.923
KIF4A	TPX2	1856112	1848175	9606.ENSP00000363524	9606.ENSP00000300403	0	0	0	0	0.868	0	0	0.439	0.923
CENPP	BUB1B	1856335	1847075	9606.ENSP00000364737	9606.ENSP00000287598	0	0	0	0	0.17	0	0.9	0.156	0.923
POLD1	DTL	1860575	1854490	9606.ENSP00000406046	9606.ENSP00000355958	0	0	0	0	0.25	0	0.9	0.066	0.923
CDC20	CDT1	1849070	1848231	9606.ENSP00000308450	9606.ENSP00000301019	0	0	0	0	0.827	0.36	0	0.36	0.923
MAGOHB	THOC3	1850128	1845690	9606.ENSP00000319240	9606.ENSP00000265097	0	0	0	0	0.065	0	0.9	0.25	0.923
TTK	CCNA2	1855108	1846354	9606.ENSP00000358813	9606.ENSP00000274026	0	0	0	0	0.879	0.188	0	0.27	0.922
PRC1	CDKN3	1858173	1851839	9606.ENSP00000377793	9606.ENSP00000335357	0	0	0	0	0.842	0.109	0	0.489	0.922
CENPP	SKA1	1856335	1846949	9606.ENSP00000364737	9606.ENSP00000285116	0	0	0	0	0.157	0	0.9	0.151	0.922
TOP2A	NUP214	1860923	1853838	9606.ENSP00000411532	9606.ENSP00000352400	0	0	0	0	0.127	0	0.9	0.187	0.922
SKA1	MLF1IP	1846949	1846726	9606.ENSP00000285116	9606.ENSP00000281453	0	0	0	0	0.163	0	0.9	0.151	0.922
ANLN	KIF11	1845802	1844817	9606.ENSP00000265748	9606.ENSP00000260731	0	0	0	0	0.895	0	0	0.293	0.922
PCNA	H2AFZ	1856984	1847723	9606.ENSP00000368438	9606.ENSP00000296417	0	0	0	0	0.878	0	0	0.385	0.922
CHEK1	DTL	1859362	1854490	9606.ENSP00000388648	9606.ENSP00000355958	0	0	0	0	0.839	0.36	0	0.303	0.922
CDKN3	PLK4	1851839	1846179	9606.ENSP00000335357	9606.ENSP00000270861	0	0	0	0	0.667	0.541	0	0.528	0.921
HJURP	H2AFZ	1861060	1847723	9606.ENSP00000414109	9606.ENSP00000296417	0	0	0	0	0.148	0	0.9	0.155	0.921
MAD2L1	DLGAP5	1847745	1843859	9606.ENSP00000296509	9606.ENSP00000247191	0	0	0	0	0.892	0	0	0.304	0.921
CKS1B	CDC20	1849378	1849070	9606.ENSP00000311083	9606.ENSP00000308450	0	0	0	0	0.726	0.285	0	0.629	0.921
AURKB	CDKN3	1863844	1851839	9606.ENSP00000463999	9606.ENSP00000335357	0	0	0	0	0.817	0.295	0	0.441	0.921
UBE2C	CDC34	1853360	1842491	9606.ENSP00000348838	9606.ENSP00000215574	0	0	0	0.804	0.099	0.11	0.9	0.525	0.921
RRM2	MAD2L1	1854033	1847745	9606.ENSP00000353770	9606.ENSP00000296509	0	0	0	0	0.894	0	0	0.287	0.921
TOP2A	MCM2	1860923	1845676	9606.ENSP00000411532	9606.ENSP00000265056	0	0	0	0	0.841	0.061	0	0.512	0.921
PCNA	MAD2L1	1856984	1847745	9606.ENSP00000368438	9606.ENSP00000296509	0	0	0	0	0.895	0	0	0.278	0.921
TOP2A	DLGAP5	1860923	1843859	9606.ENSP00000411532	9606.ENSP00000247191	0	0	0	0	0.886	0	0	0.325	0.92
RACGAP1	ANLN	1849236	1845802	9606.ENSP00000309871	9606.ENSP00000265748	0	0	0	0	0.76	0	0	0.68	0.92
CTNNBL1	MAGOHB	1854287	1850128	9606.ENSP00000355050	9606.ENSP00000319240	0	0	0	0	0.072	0	0.9	0.21	0.92
CEP55	FOXM1	1855493	1852579	9606.ENSP00000360540	9606.ENSP00000342307	0	0	0	0	0.826	0	0	0.56	0.92
CENPP	PLK1	1856335	1848135	9606.ENSP00000364737	9606.ENSP00000300093	0	0	0	0	0.171	0	0.9	0.122	0.92
CDC45	PRC1	1860553	1858173	9606.ENSP00000405726	9606.ENSP00000377793	0	0	0	0	0.908	0	0	0.169	0.92
RRM2	MCM6	1854033	1845487	9606.ENSP00000353770	9606.ENSP00000264156	0	0	0	0	0.885	0	0	0.338	0.92
CEP55	RACGAP1	1855493	1849236	9606.ENSP00000360540	9606.ENSP00000309871	0	0	0	0	0.862	0.145	0	0.379	0.92
TOP2A	FEN1	1860923	1848737	9606.ENSP00000411532	9606.ENSP00000305480	0.056	0	0	0	0.792	0.066	0	0.617	0.92
CDC45	RRM2	1860553	1854033	9606.ENSP00000405726	9606.ENSP00000353770	0	0	0	0	0.904	0	0	0.205	0.92
PCNA	POLR2D	1856984	1846274	9606.ENSP00000368438	9606.ENSP00000272645	0	0	0	0	0.11	0.178	0.9	0	0.92
CDK1	ECT2	1858283	1843313	9606.ENSP00000378699	9606.ENSP00000232458	0	0	0	0	0.824	0.36	0	0.348	0.92
CDCA8	TPX2	1849847	1848175	9606.ENSP00000316121	9606.ENSP00000300403	0	0	0	0	0.871	0	0	0.409	0.92
KIF20A	MAD2L1	1858244	1847745	9606.ENSP00000378356	9606.ENSP00000296509	0	0	0	0	0.755	0.553	0	0.331	0.92
CENPP	ZWINT	1856335	1856020	9606.ENSP00000364737	9606.ENSP00000363055	0	0	0	0	0.088	0	0.9	0.183	0.919
TPX2	CCNB1	1848175	1844435	9606.ENSP00000300403	9606.ENSP00000256442	0	0	0	0	0.878	0	0	0.364	0.919
PRC1	KIF2C	1858173	1855643	9606.ENSP00000377793	9606.ENSP00000361298	0	0	0	0	0.851	0.196	0	0.385	0.919
PLK1	MAD1L1	1848135	1845817	9606.ENSP00000300093	9606.ENSP00000265854	0	0	0	0	0.074	0	0.9	0.203	0.919
SKA1	CENPK	1846949	1843648	9606.ENSP00000285116	9606.ENSP00000242872	0	0	0	0	0.115	0	0.9	0.16	0.919
SPC24	CENPP	1863909	1856335	9606.ENSP00000465075	9606.ENSP00000364737	0	0	0	0	0.158	0	0.9	0.124	0.919
NUF2	MAD1L1	1846198	1845817	9606.ENSP00000271452	9606.ENSP00000265854	0	0	0	0	0.086	0.065	0.9	0.167	0.919
CDK1	CENPP	1858283	1856335	9606.ENSP00000378699	9606.ENSP00000364737	0	0	0	0	0.205	0	0.9	0.065	0.919
BRIX1	DDX54	1852151	1850587	9606.ENSP00000338862	9606.ENSP00000323858	0	0	0	0	0.726	0.717	0	0	0.919
CENPP	CDCA5	1856335	1846446	9606.ENSP00000364737	9606.ENSP00000275517	0	0	0	0	0.224	0	0.9	0	0.919
NUF2	NCAPG	1846198	1844063	9606.ENSP00000271452	9606.ENSP00000251496	0	0	0	0	0.898	0	0	0.243	0.919
CDKN3	CCNB2	1851839	1847117	9606.ENSP00000335357	9606.ENSP00000288207	0	0	0	0	0.859	0.17	0	0.365	0.919
CCNF	PLK1	1858453	1848135	9606.ENSP00000380256	9606.ENSP00000300093	0	0	0	0	0.576	0.513	0	0.639	0.919
BUB1	PLK4	1848415	1846179	9606.ENSP00000302530	9606.ENSP00000270861	0	0	0	0	0.86	0.276	0	0.258	0.918
SPC25	CENPK	1846768	1843648	9606.ENSP00000282074	9606.ENSP00000242872	0	0	0	0	0.175	0	0.9	0.092	0.918
BUB1	ANLN	1848415	1845802	9606.ENSP00000302530	9606.ENSP00000265748	0	0	0	0	0.9	0	0	0.205	0.918
KIF2C	MAD1L1	1855643	1845817	9606.ENSP00000361298	9606.ENSP00000265854	0	0	0	0	0.055	0.121	0.9	0.134	0.918
SUV39H1	HIST1H2BK	1856539	1853439	9606.ENSP00000365877	9606.ENSP00000349430	0	0	0	0	0.046	0.137	0.9	0.125	0.918
KIF20A	CCNA2	1858244	1846354	9606.ENSP00000378356	9606.ENSP00000274026	0	0	0	0	0.879	0.123	0	0.294	0.918
GINS2	POLE2	1844233	1842589	9606.ENSP00000253462	9606.ENSP00000216367	0	0	0	0	0.806	0.096	0	0.569	0.918
CENPP	CCNB2	1856335	1847117	9606.ENSP00000364737	9606.ENSP00000288207	0	0	0	0	0.208	0	0.9	0.051	0.918
FOXM1	MELK	1852579	1847923	9606.ENSP00000342307	9606.ENSP00000298048	0	0	0	0	0.805	0.054	0	0.59	0.918
RRM2	ASF1B	1854033	1845347	9606.ENSP00000353770	9606.ENSP00000263382	0	0	0	0	0.826	0.512	0	0.112	0.918
FEN1	RNASEH2A	1848737	1842842	9606.ENSP00000305480	9606.ENSP00000221486	0.067	0	0	0	0.765	0.182	0	0.6	0.918
CDK11A	PLK1	1858946	1848135	9606.ENSP00000384442	9606.ENSP00000300093	0	0	0	0.621	0.056	0	0.9	0.482	0.918
SLC27A2	ACADL	1845968	1843363	9606.ENSP00000267842	9606.ENSP00000233710	0	0	0	0	0	0	0.9	0.215	0.918
MLF1IP	ESPL1	1846726	1844556	9606.ENSP00000281453	9606.ENSP00000257934	0	0	0	0	0.173	0	0.9	0.091	0.918
POLD1	KIAA0101	1860575	1848123	9606.ENSP00000406046	9606.ENSP00000300035	0	0	0	0	0.193	0	0.9	0.058	0.917
CENPP	KIF2C	1856335	1855643	9606.ENSP00000364737	9606.ENSP00000361298	0	0	0	0	0.142	0	0.9	0.119	0.917
HJURP	CENPP	1861060	1856335	9606.ENSP00000414109	9606.ENSP00000364737	0	0	0	0	0	0	0.9	0.211	0.917
CENPA	RSF1	1851939	1849435	9606.ENSP00000336868	9606.ENSP00000311513	0	0	0	0	0	0.194	0.9	0.052	0.917
CENPP	CDCA8	1856335	1849847	9606.ENSP00000364737	9606.ENSP00000316121	0	0	0	0	0.211	0	0.9	0	0.917
NDUFA13	COX6A1	1861604	1843204	9606.ENSP00000423673	9606.ENSP00000229379	0	0	0	0	0.909	0	0	0.112	0.916
TOP2A	TPX2	1860923	1848175	9606.ENSP00000411532	9606.ENSP00000300403	0	0	0	0	0.879	0	0	0.34	0.916
KIF2C	CCNA2	1855643	1846354	9606.ENSP00000361298	9606.ENSP00000274026	0	0	0	0	0.864	0.123	0	0.353	0.916
CHRNA7	CHRNA5	1860670	1848079	9606.ENSP00000407546	9606.ENSP00000299565	0	0	0	0.861	0.05	0.131	0.9	0.518	0.916
KIF11	MCM3	1844817	1843226	9606.ENSP00000260731	9606.ENSP00000229854	0	0	0	0	0.909	0	0	0.113	0.916
HIST1H2BK	REC8	1853439	1849097	9606.ENSP00000349430	9606.ENSP00000308699	0	0	0	0	0.054	0.176	0.9	0.057	0.916
KIF20A	FOXM1	1858244	1852579	9606.ENSP00000378356	9606.ENSP00000342307	0	0	0	0	0.817	0.05	0	0.555	0.916
PRC1	ASPM	1858173	1854584	9606.ENSP00000377793	9606.ENSP00000356379	0	0	0	0	0.91	0	0	0.103	0.916
EPHB2	EPHA4	1856154	1846745	9606.ENSP00000363763	9606.ENSP00000281821	0	0	0	0.968	0.053	0.173	0.9	0.601	0.916
KIF2C	DLGAP5	1855643	1843859	9606.ENSP00000361298	9606.ENSP00000247191	0	0	0	0	0.842	0.054	0	0.483	0.916
CDCA8	KIF11	1849847	1844817	9606.ENSP00000316121	9606.ENSP00000260731	0	0	0	0	0.848	0	0	0.471	0.916
ASPM	MAD2L1	1854584	1847745	9606.ENSP00000356379	9606.ENSP00000296509	0	0	0	0	0.907	0	0	0.124	0.915
CCNF	TRAIP	1858453	1851007	9606.ENSP00000380256	9606.ENSP00000328203	0	0	0	0	0.176	0	0.9	0.061	0.915
CDK1	MCM2	1858283	1845676	9606.ENSP00000378699	9606.ENSP00000265056	0	0	0	0	0.733	0.139	0	0.659	0.915
MELK	CCNB1	1847923	1844435	9606.ENSP00000298048	9606.ENSP00000256442	0	0	0	0	0.882	0.12	0	0.244	0.915
PBK	MELK	1848348	1847923	9606.ENSP00000301905	9606.ENSP00000298048	0	0	0	0	0.875	0.066	0	0.332	0.915
CDCA8	DLGAP5	1849847	1843859	9606.ENSP00000316121	9606.ENSP00000247191	0	0	0	0	0.883	0	0	0.305	0.915
TYMS	NCAPG	1849803	1844063	9606.ENSP00000315644	9606.ENSP00000251496	0	0	0	0	0.905	0	0	0.143	0.915
UBE2S	CDC34	1845564	1842491	9606.ENSP00000264552	9606.ENSP00000215574	0	0	0	0.749	0.054	0	0.9	0.606	0.915
NDC80	DLGAP5	1844946	1843859	9606.ENSP00000261597	9606.ENSP00000247191	0	0	0	0	0.894	0	0	0.23	0.915
TOP2A	CENPA	1860923	1851939	9606.ENSP00000411532	9606.ENSP00000336868	0	0	0	0	0.83	0.062	0	0.507	0.915
CENPP	OIP5	1856335	1842788	9606.ENSP00000364737	9606.ENSP00000220514	0	0	0	0	0.159	0	0.9	0.074	0.915
PBK	DLGAP5	1848348	1843859	9606.ENSP00000301905	9606.ENSP00000247191	0	0	0	0	0.894	0	0	0.23	0.915
HIST1H2BK	STAG3	1853439	1850137	9606.ENSP00000349430	9606.ENSP00000319318	0	0	0	0	0	0.189	0.9	0	0.915
POLR2D	SNRPF	1846274	1845900	9606.ENSP00000272645	9606.ENSP00000266735	0	0	0	0	0.191	0	0.9	0	0.915
PTTG1	CDCA8	1852874	1849847	9606.ENSP00000344936	9606.ENSP00000316121	0	0	0	0	0.858	0	0	0.427	0.915
EPHB2	RGS3	1856154	1844692	9606.ENSP00000363763	9606.ENSP00000259406	0	0	0	0	0.06	0.07	0.9	0.145	0.915
CENPH	SPC25	1846827	1846768	9606.ENSP00000283006	9606.ENSP00000282074	0	0	0	0	0.131	0.094	0.9	0.051	0.915
SNRPB	NUP214	1860980	1853838	9606.ENSP00000412566	9606.ENSP00000352400	0	0	0	0	0	0	0.9	0.18	0.914
POLD1	RMI2	1860575	1849289	9606.ENSP00000406046	9606.ENSP00000310356	0	0	0	0	0.179	0	0.9	0	0.914
NCAPG2	H2AFZ	1853329	1847723	9606.ENSP00000348657	9606.ENSP00000296417	0	0	0	0	0.179	0	0.9	0	0.914
NCAPG	DLGAP5	1844063	1843859	9606.ENSP00000251496	9606.ENSP00000247191	0	0	0	0	0.888	0	0	0.264	0.914
TOP2A	CDC45	1860923	1860553	9606.ENSP00000411532	9606.ENSP00000405726	0	0	0	0	0.88	0	0	0.311	0.914
CENPW	H2AFZ	1854781	1847723	9606.ENSP00000357311	9606.ENSP00000296417	0	0	0	0	0.179	0	0.9	0	0.914
TTK	DLGAP5	1855108	1843859	9606.ENSP00000358813	9606.ENSP00000247191	0	0	0	0	0.893	0	0	0.232	0.914
CDK11A	CDK1	1858946	1858283	9606.ENSP00000384442	9606.ENSP00000378699	0	0	0	0.925	0.074	0.099	0.9	0.602	0.913
RHOF	ECT2	1845928	1843313	9606.ENSP00000267205	9606.ENSP00000232458	0	0	0	0	0.052	0.116	0.9	0.084	0.913
SOCS1	UBE2S	1851146	1845564	9606.ENSP00000329418	9606.ENSP00000264552	0	0	0	0	0.043	0	0.9	0.168	0.913
POLD1	RAD51AP1	1860575	1843165	9606.ENSP00000406046	9606.ENSP00000228843	0	0	0	0	0.151	0	0.9	0.058	0.913
CENPA	MAD1L1	1851939	1845817	9606.ENSP00000336868	9606.ENSP00000265854	0	0	0	0	0.052	0.071	0.9	0.133	0.913
CDKN3	NCAPG	1851839	1844063	9606.ENSP00000335357	9606.ENSP00000251496	0	0	0	0	0.877	0.047	0	0.32	0.913
TRAIP	UBE2S	1851007	1845564	9606.ENSP00000328203	9606.ENSP00000264552	0	0	0	0	0.143	0.05	0.9	0.055	0.912
MELK	KIF23	1847923	1844781	9606.ENSP00000298048	9606.ENSP00000260363	0	0	0	0	0.885	0.088	0	0.231	0.912
RRM2	NCAPG	1854033	1844063	9606.ENSP00000353770	9606.ENSP00000251496	0	0	0	0	0.883	0	0	0.277	0.912
BUB1	PBK	1848415	1848348	9606.ENSP00000302530	9606.ENSP00000301905	0	0	0	0	0.892	0.052	0	0.203	0.912
MIB2	JAG1	1861674	1844342	9606.ENSP00000426103	9606.ENSP00000254958	0	0	0	0	0.053	0.042	0.9	0.151	0.912
MAGOHB	THOC1	1850128	1844947	9606.ENSP00000319240	9606.ENSP00000261600	0	0	0	0	0.066	0	0.9	0.14	0.912
FBXO2	UBE2S	1853030	1845564	9606.ENSP00000346240	9606.ENSP00000264552	0	0	0	0	0	0	0.9	0.161	0.912
KIF23	DLGAP5	1844781	1843859	9606.ENSP00000260363	9606.ENSP00000247191	0	0	0	0	0.885	0.054	0	0.256	0.912
PLA2G4B	PLD3	1859907	1853368	9606.ENSP00000396045	9606.ENSP00000348901	0	0	0	0	0	0	0.9	0.163	0.912
HIST1H2BK	CBX8	1853439	1846089	9606.ENSP00000349430	9606.ENSP00000269385	0	0	0	0	0	0.16	0.9	0	0.912
ASPM	KIF23	1854584	1844781	9606.ENSP00000356379	9606.ENSP00000260363	0	0	0	0	0.899	0	0	0.162	0.912
COL4A3	PLOD3	1858404	1842962	9606.ENSP00000379823	9606.ENSP00000223127	0	0	0	0	0	0.161	0.9	0	0.912
HIST1H2BK	SMC4	1853439	1852454	9606.ENSP00000349430	9606.ENSP00000341382	0	0	0	0	0.053	0.132	0.9	0.065	0.912
TOP2A	PTTG1	1860923	1852874	9606.ENSP00000411532	9606.ENSP00000344936	0	0	0	0	0.873	0	0	0.341	0.912
RRM2	DLGAP5	1854033	1843859	9606.ENSP00000353770	9606.ENSP00000247191	0	0	0	0	0.881	0	0	0.277	0.911
PRC1	TTK	1858173	1855108	9606.ENSP00000377793	9606.ENSP00000358813	0	0	0	0	0.88	0.052	0	0.277	0.911
CDC45	TYMS	1860553	1849803	9606.ENSP00000405726	9606.ENSP00000315644	0	0	0	0	0.895	0	0	0.191	0.911
CHEK1	POLR2D	1859362	1846274	9606.ENSP00000388648	9606.ENSP00000272645	0	0	0	0	0.152	0	0.9	0	0.911
KDELR1	TMED3	1851154	1848093	9606.ENSP00000329471	9606.ENSP00000299705	0	0	0	0	0.102	0	0.9	0.097	0.911
SNRNP70	POLR2D	1864888	1846274	9606.ENSP00000472998	9606.ENSP00000272645	0	0	0	0	0.055	0.116	0.9	0.065	0.911
TPX2	CCNB2	1848175	1847117	9606.ENSP00000300403	9606.ENSP00000288207	0	0	0	0	0.874	0	0	0.327	0.911
H2AFZ	POLR2D	1847723	1846274	9606.ENSP00000296417	9606.ENSP00000272645	0	0	0	0	0.142	0.049	0.9	0.044	0.911
RHNO1	RAD51	1862100	1857551	9606.ENSP00000438590	9606.ENSP00000372088	0	0	0	0	0.148	0	0.9	0	0.911
CENPP	SPC25	1856335	1846768	9606.ENSP00000364737	9606.ENSP00000282074	0	0	0	0	0.153	0	0.9	0	0.911
CDCA8	MAD1L1	1849847	1845817	9606.ENSP00000316121	9606.ENSP00000265854	0	0	0	0	0.053	0	0.9	0.142	0.911
CDKN3	MELK	1851839	1847923	9606.ENSP00000335357	9606.ENSP00000298048	0	0	0	0	0.874	0.17	0	0.218	0.911
EPHB2	PSENEN	1856154	1842899	9606.ENSP00000363763	9606.ENSP00000222266	0	0	0	0	0	0	0.9	0.151	0.911
KIF20A	NCAPG	1858244	1844063	9606.ENSP00000378356	9606.ENSP00000251496	0	0	0	0	0.873	0.066	0	0.304	0.91
CDK11A	NEK2	1858946	1854493	9606.ENSP00000384442	9606.ENSP00000355966	0	0	0	0.66	0.122	0	0.9	0.102	0.91
HMMR	DYNLL1	1858139	1843632	9606.ENSP00000377492	9606.ENSP00000242577	0	0	0	0	0	0.143	0.9	0	0.91
RAN	POLR2D	1857999	1846274	9606.ENSP00000376176	9606.ENSP00000272645	0	0	0	0	0.143	0	0.9	0	0.91
SRRM2	LSM7	1848331	1844145	9606.ENSP00000301740	9606.ENSP00000252622	0	0	0	0	0.061	0.1	0.9	0.067	0.91
TOP2A	MELK	1860923	1847923	9606.ENSP00000411532	9606.ENSP00000298048	0	0	0	0	0.854	0	0	0.41	0.91
MELK	CCNB2	1847923	1847117	9606.ENSP00000298048	9606.ENSP00000288207	0	0	0	0	0.873	0.12	0	0.258	0.91
CDKN2A	CDKN2D	1859838	1851957	9606.ENSP00000394932	9606.ENSP00000337056	0	0	0	0.862	0	0	0.9	0.723	0.909
KIF11	DYNLL1	1844817	1843632	9606.ENSP00000260731	9606.ENSP00000242577	0	0	0	0	0	0.07	0.9	0.106	0.909
ASPM	BUB1B	1854584	1847075	9606.ENSP00000356379	9606.ENSP00000287598	0	0	0	0	0.89	0	0	0.205	0.909
RSF1	CENPH	1849435	1846827	9606.ENSP00000311513	9606.ENSP00000283006	0	0	0	0	0	0	0.9	0.136	0.909
MAGOHB	POLR2D	1850128	1846274	9606.ENSP00000319240	9606.ENSP00000272645	0	0	0	0	0.131	0	0.9	0.041	0.909
AURKB	DLGAP5	1863844	1843859	9606.ENSP00000463999	9606.ENSP00000247191	0	0	0	0	0.852	0	0	0.407	0.909
PLK4	KIF11	1846179	1844817	9606.ENSP00000270861	9606.ENSP00000260731	0	0	0	0	0.882	0	0	0.26	0.909
TOP2A	KIF20A	1860923	1858244	9606.ENSP00000411532	9606.ENSP00000378356	0	0	0	0	0.88	0	0	0.276	0.909
KIF2C	DYNLL1	1855643	1843632	9606.ENSP00000361298	9606.ENSP00000242577	0	0	0	0	0.053	0.058	0.9	0.106	0.909
KIF20A	CENPA	1858244	1851939	9606.ENSP00000378356	9606.ENSP00000336868	0	0	0	0	0.856	0.096	0	0.357	0.909
CDC20	PKMYT1	1849070	1845109	9606.ENSP00000308450	9606.ENSP00000262300	0	0	0	0	0.481	0.667	0	0.519	0.909
FBXO2	CDC34	1853030	1842491	9606.ENSP00000346240	9606.ENSP00000215574	0	0	0	0	0	0	0.9	0.129	0.909
CEP72	DYNLL1	1845648	1843632	9606.ENSP00000264935	9606.ENSP00000242577	0	0	0	0	0	0.133	0.9	0	0.909
RACGAP1	PLK1	1849236	1848135	9606.ENSP00000309871	9606.ENSP00000300093	0	0	0	0	0.555	0.285	0	0.736	0.909
PBK	CCNA2	1848348	1846354	9606.ENSP00000301905	9606.ENSP00000274026	0	0	0	0	0.879	0.12	0	0.215	0.909
RACGAP1	RHOF	1849236	1845928	9606.ENSP00000309871	9606.ENSP00000267205	0	0	0	0	0	0.11	0.9	0.066	0.909
H2AFZ	CENPK	1847723	1843648	9606.ENSP00000296417	9606.ENSP00000242872	0	0	0	0	0.129	0	0.9	0	0.909
KIF20A	DYNLL1	1858244	1843632	9606.ENSP00000378356	9606.ENSP00000242577	0	0	0	0	0	0.058	0.9	0.106	0.908
KDELR3	TMED3	1859221	1848093	9606.ENSP00000386918	9606.ENSP00000299705	0	0	0	0	0.102	0	0.9	0.064	0.908
HAND2	GATA4	1853866	1851726	9606.ENSP00000352565	9606.ENSP00000334458	0	0	0	0	0	0.368	0	0.86	0.908
HMMR	DLGAP5	1858139	1843859	9606.ENSP00000377492	9606.ENSP00000247191	0	0	0	0	0.863	0	0	0.356	0.908
CDKN3	BUB1	1851839	1848415	9606.ENSP00000335357	9606.ENSP00000302530	0	0	0	0	0.874	0.065	0	0.279	0.908
KIF4A	DYNLL1	1856112	1843632	9606.ENSP00000363524	9606.ENSP00000242577	0	0	0	0	0	0.058	0.9	0.106	0.908
CHEK1	PPP2R2B	1859362	1851897	9606.ENSP00000388648	9606.ENSP00000336591	0	0	0	0	0.086	0	0.9	0.08	0.908
DYNLL1	KIF22	1843632	1842279	9606.ENSP00000242577	9606.ENSP00000160827	0	0	0	0	0	0.058	0.9	0.106	0.908
RSF1	H2AFZ	1849435	1847723	9606.ENSP00000311513	9606.ENSP00000296417	0	0	0	0	0	0	0.9	0.127	0.908
HJURP	RSF1	1861060	1849435	9606.ENSP00000414109	9606.ENSP00000311513	0	0	0	0	0	0	0.9	0.125	0.908
H2AFZ	CENPH	1847723	1846827	9606.ENSP00000296417	9606.ENSP00000283006	0	0	0	0	0.097	0	0.9	0.065	0.908
RACGAP1	SHCBP1	1849236	1848847	9606.ENSP00000309871	9606.ENSP00000306473	0	0	0	0	0.587	0.741	0	0.211	0.908
H2AFZ	CENPM	1847723	1842528	9606.ENSP00000296417	9606.ENSP00000215980	0	0	0	0	0.12	0	0.9	0	0.908
MELK	MAD2L1	1847923	1847745	9606.ENSP00000298048	9606.ENSP00000296509	0	0	0	0	0.869	0.096	0	0.281	0.908
KIF23	DYNLL1	1844781	1843632	9606.ENSP00000260363	9606.ENSP00000242577	0	0	0	0	0	0.058	0.9	0.106	0.908
RACGAP1	MAD2L1	1849236	1847745	9606.ENSP00000309871	9606.ENSP00000296509	0	0	0	0	0.884	0	0	0.24	0.908
SNRNP70	LSM7	1864888	1844145	9606.ENSP00000472998	9606.ENSP00000252622	0	0	0	0	0.053	0	0.9	0.111	0.908
REC8	H2AFZ	1849097	1847723	9606.ENSP00000308699	9606.ENSP00000296417	0	0	0	0	0	0.065	0.9	0.089	0.907
HIST1H2BK	CCNA2	1853439	1846354	9606.ENSP00000349430	9606.ENSP00000274026	0	0	0	0	0.074	0.062	0.9	0.063	0.907
ZWINT	MAD1L1	1856020	1845817	9606.ENSP00000363055	9606.ENSP00000265854	0	0	0	0	0	0	0.9	0.116	0.907
MIB2	CCNF	1861674	1858453	9606.ENSP00000426103	9606.ENSP00000380256	0	0	0	0	0.086	0	0.9	0.065	0.907
PTTG1	TPX2	1852874	1848175	9606.ENSP00000344936	9606.ENSP00000300403	0	0	0	0	0.865	0	0	0.341	0.907
NUP214	HSPA4	1853838	1848476	9606.ENSP00000352400	9606.ENSP00000302961	0	0	0	0	0.066	0	0.9	0.089	0.907
SOCS1	CDC34	1851146	1842491	9606.ENSP00000329418	9606.ENSP00000215574	0	0	0	0	0.046	0	0.9	0.112	0.907
PTTG1	MAD2L1	1852874	1847745	9606.ENSP00000344936	9606.ENSP00000296509	0	0	0	0	0.829	0	0	0.481	0.907
CEP55	ANLN	1855493	1845802	9606.ENSP00000360540	9606.ENSP00000265748	0	0	0	0	0.872	0	0	0.304	0.907
CENPP	ESPL1	1856335	1844556	9606.ENSP00000364737	9606.ENSP00000257934	0	0	0	0	0.106	0	0.9	0.046	0.907
PSMC3IP	CDK4	1858126	1844551	9606.ENSP00000377384	9606.ENSP00000257904	0	0	0	0	0.102	0	0.9	0	0.906
HIST1H2BK	CCNB1	1853439	1844435	9606.ENSP00000349430	9606.ENSP00000256442	0	0	0	0	0.063	0.065	0.9	0.057	0.906
RHNO1	EXO1	1862100	1849472	9606.ENSP00000438590	9606.ENSP00000311873	0	0	0	0	0.103	0	0.9	0	0.906
CEP55	KIF11	1855493	1844817	9606.ENSP00000360540	9606.ENSP00000260731	0	0	0	0	0.878	0.071	0	0.239	0.906
FANCI	POLR2D	1849356	1846274	9606.ENSP00000310842	9606.ENSP00000272645	0	0	0	0	0.105	0	0.9	0	0.906
MELK	CCNA2	1847923	1846354	9606.ENSP00000298048	9606.ENSP00000274026	0	0	0	0	0.872	0.12	0	0.231	0.906
CHEK1	CCNB2	1859362	1847117	9606.ENSP00000388648	9606.ENSP00000288207	0	0	0	0	0.801	0.065	0	0.538	0.906
CCNF	CKS1B	1858453	1849378	9606.ENSP00000380256	9606.ENSP00000311083	0	0	0	0	0.244	0.678	0	0.647	0.906
CDK1	NUP214	1858283	1853838	9606.ENSP00000378699	9606.ENSP00000352400	0	0	0	0	0	0	0.9	0.106	0.906
CDK4	MND1	1844551	1843567	9606.ENSP00000257904	9606.ENSP00000240488	0	0	0	0	0.099	0	0.9	0.045	0.906
SNRNP70	CTNNBL1	1864888	1854287	9606.ENSP00000472998	9606.ENSP00000355050	0	0	0	0	0.099	0	0.9	0.047	0.906
ASPM	NEK2	1854584	1854493	9606.ENSP00000356379	9606.ENSP00000355966	0	0	0	0	0.9	0	0	0.092	0.906
CCNA2	TRIP13	1846354	1842297	9606.ENSP00000274026	9606.ENSP00000166345	0	0	0	0	0.865	0.192	0	0.208	0.906
MIB2	FBXO2	1861674	1853030	9606.ENSP00000426103	9606.ENSP00000346240	0	0	0	0	0.052	0	0.9	0.089	0.906
CEP55	BUB1	1855493	1848415	9606.ENSP00000360540	9606.ENSP00000302530	0	0	0	0	0.871	0	0	0.304	0.906
RACGAP1	DLGAP5	1849236	1843859	9606.ENSP00000309871	9606.ENSP00000247191	0	0	0	0	0.872	0	0	0.299	0.906
NT5M	TYMS	1857785	1849803	9606.ENSP00000373674	9606.ENSP00000315644	0	0	0	0	0	0	0.9	0.098	0.906
GPX8	CYP2C8	1861608	1855452	9606.ENSP00000423822	9606.ENSP00000360317	0	0	0	0	0.05	0	0.9	0.092	0.906
NDC80	KIF23	1844946	1844781	9606.ENSP00000261597	9606.ENSP00000260363	0	0	0	0	0.876	0.067	0	0.247	0.905
ASPM	ANLN	1854584	1845802	9606.ENSP00000356379	9606.ENSP00000265748	0	0	0	0	0.889	0	0	0.173	0.905
MIB2	CDC20	1861674	1849070	9606.ENSP00000426103	9606.ENSP00000308450	0	0	0	0	0.093	0	0.9	0	0.905
POLR2D	LSM7	1846274	1844145	9606.ENSP00000272645	9606.ENSP00000252622	0	0	0	0	0.085	0	0.9	0.05	0.905
PLK1	CEP72	1848135	1845648	9606.ENSP00000300093	9606.ENSP00000264935	0	0	0	0	0	0	0.9	0.089	0.905
TPX2	MELK	1848175	1847923	9606.ENSP00000300403	9606.ENSP00000298048	0	0	0	0	0.873	0	0	0.285	0.905
MAGOHB	SRRM2	1850128	1848331	9606.ENSP00000319240	9606.ENSP00000301740	0	0	0	0	0.06	0	0.9	0.08	0.905
SPARC	RARRES2	1843274	1842971	9606.ENSP00000231061	9606.ENSP00000223271	0	0	0	0	0.09	0	0.9	0.041	0.905
PLK4	CEP72	1846179	1845648	9606.ENSP00000270861	9606.ENSP00000264935	0	0	0	0	0	0	0.9	0.092	0.905
SUV39H1	PLOD3	1856539	1842962	9606.ENSP00000365877	9606.ENSP00000223127	0	0	0	0	0	0	0.9	0.092	0.905
PBK	KIF23	1848348	1844781	9606.ENSP00000301905	9606.ENSP00000260363	0	0	0	0	0.881	0.088	0	0.198	0.905
CDK1	HIST1H2BK	1858283	1853439	9606.ENSP00000378699	9606.ENSP00000349430	0	0	0	0	0.053	0.043	0.9	0.081	0.905
HMMR	CEP72	1858139	1845648	9606.ENSP00000377492	9606.ENSP00000264935	0	0	0	0	0.094	0	0.9	0	0.905
POLR2D	POLE2	1846274	1842589	9606.ENSP00000272645	9606.ENSP00000216367	0	0	0	0	0.093	0	0.9	0	0.905
TMOD1	VIM	1844687	1842995	9606.ENSP00000259365	9606.ENSP00000224237	0	0	0	0	0.054	0	0.9	0.079	0.905
STAG3	H2AFZ	1850137	1847723	9606.ENSP00000319318	9606.ENSP00000296417	0	0	0	0	0	0.066	0.9	0.066	0.905
MELK	DLGAP5	1847923	1843859	9606.ENSP00000298048	9606.ENSP00000247191	0	0	0	0	0.872	0	0	0.29	0.905
CDKN3	PBK	1851839	1848348	9606.ENSP00000335357	9606.ENSP00000301905	0	0	0	0	0.866	0.17	0	0.215	0.905
FBXO2	CDC20	1853030	1849070	9606.ENSP00000346240	9606.ENSP00000308450	0	0	0	0	0	0	0.9	0.094	0.905
POLD1	CDC45	1860575	1860553	9606.ENSP00000406046	9606.ENSP00000405726	0	0	0	0	0.551	0.595	0	0.519	0.905
POLD1	POLR2D	1860575	1846274	9606.ENSP00000406046	9606.ENSP00000272645	0	0	0	0	0.089	0	0.9	0	0.905
CHEK1	MAD2L1	1859362	1847745	9606.ENSP00000388648	9606.ENSP00000296509	0	0	0	0	0.846	0.17	0	0.315	0.905
SRRM2	POLR2D	1848331	1846274	9606.ENSP00000301740	9606.ENSP00000272645	0	0	0	0	0	0	0.9	0.089	0.905
VCAM1	OASL	1847502	1844517	9606.ENSP00000294728	9606.ENSP00000257570	0	0	0	0	0	0	0.9	0.083	0.904
RRM2	CDC20	1854033	1849070	9606.ENSP00000353770	9606.ENSP00000308450	0	0	0	0	0.843	0.117	0	0.36	0.904
GEMIN7	SNRPF	1846143	1845900	9606.ENSP00000270257	9606.ENSP00000266735	0	0	0	0	0.088	0	0.9	0	0.904
CCNF	PLK4	1858453	1846179	9606.ENSP00000380256	9606.ENSP00000270861	0	0	0	0	0.421	0.513	0	0.686	0.904
PTTG1	DLGAP5	1852874	1843859	9606.ENSP00000344936	9606.ENSP00000247191	0	0	0	0	0.867	0	0	0.305	0.904
CEP72	AURKA	1845648	1842628	9606.ENSP00000264935	9606.ENSP00000216911	0	0	0	0	0.056	0	0.9	0.065	0.904
CENPP	H2AFZ	1856335	1847723	9606.ENSP00000364737	9606.ENSP00000296417	0	0	0	0	0.065	0	0.9	0.065	0.904
RHNO1	RMI2	1862100	1849289	9606.ENSP00000438590	9606.ENSP00000310356	0	0	0	0	0.088	0	0.9	0	0.904
PRC1	DLGAP5	1858173	1843859	9606.ENSP00000377793	9606.ENSP00000247191	0	0	0	0	0.873	0	0	0.271	0.904
ASPM	SMC4	1854584	1852454	9606.ENSP00000356379	9606.ENSP00000341382	0	0	0	0	0.899	0	0	0.089	0.904
HIST1H2BK	CDK4	1853439	1844551	9606.ENSP00000349430	9606.ENSP00000257904	0	0	0	0	0	0.043	0.9	0.081	0.904
UBE2C	TPX2	1853360	1848175	9606.ENSP00000348838	9606.ENSP00000300403	0	0	0	0	0.853	0	0	0.374	0.904
CCNA2	DLGAP5	1846354	1843859	9606.ENSP00000274026	9606.ENSP00000247191	0	0	0	0	0.879	0	0	0.243	0.904
NUP214	CCNB1	1853838	1844435	9606.ENSP00000352400	9606.ENSP00000256442	0	0	0	0	0.052	0	0.9	0.078	0.904
CDC45	NCAPG	1860553	1844063	9606.ENSP00000405726	9606.ENSP00000251496	0	0	0	0	0.9	0	0	0.082	0.904
EPRS	YARS2	1854472	1850272	9606.ENSP00000355890	9606.ENSP00000320658	0.384	0	0	0	0.464	0	0	0.734	0.904
DYNLL1	AURKA	1843632	1842628	9606.ENSP00000242577	9606.ENSP00000216911	0	0	0	0	0	0	0.9	0.079	0.904
PBK	ANLN	1848348	1845802	9606.ENSP00000301905	9606.ENSP00000265748	0	0	0	0	0.889	0	0	0.169	0.904
MIB2	SOCS1	1861674	1851146	9606.ENSP00000426103	9606.ENSP00000329418	0	0	0	0	0.055	0	0.9	0.071	0.904
CHEK1	CDKN3	1859362	1851839	9606.ENSP00000388648	9606.ENSP00000335357	0	0	0	0	0.812	0.049	0	0.507	0.904
TPX2	KIF23	1848175	1844781	9606.ENSP00000300403	9606.ENSP00000260363	0	0	0	0	0.853	0	0	0.368	0.903
CDK1	MELK	1858283	1847923	9606.ENSP00000378699	9606.ENSP00000298048	0	0	0	0.737	0.881	0.17	0	0.258	0.903
MAD2L1	TRIP13	1847745	1842297	9606.ENSP00000296509	9606.ENSP00000166345	0	0	0	0	0.81	0.4	0	0.215	0.903
SOCS1	CDC20	1851146	1849070	9606.ENSP00000329418	9606.ENSP00000308450	0	0	0	0	0	0	0.9	0.078	0.903
CTNNBL1	SRRM2	1854287	1848331	9606.ENSP00000355050	9606.ENSP00000301740	0	0	0	0	0.074	0	0.9	0	0.903
CDK1	KIF4A	1858283	1856112	9606.ENSP00000378699	9606.ENSP00000363524	0	0	0	0	0.843	0.094	0	0.371	0.903
TRAIP	CDC34	1851007	1842491	9606.ENSP00000328203	9606.ENSP00000215574	0	0	0	0	0.054	0.05	0.9	0.051	0.903
FANCD2	POLR2D	1847078	1846274	9606.ENSP00000287647	9606.ENSP00000272645	0	0	0	0	0.071	0	0.9	0	0.903
KIF4A	BUB1	1856112	1848415	9606.ENSP00000363524	9606.ENSP00000302530	0	0	0	0	0.832	0.197	0	0.341	0.903
OAS1	VCAM1	1859322	1847502	9606.ENSP00000388001	9606.ENSP00000294728	0	0	0	0	0	0	0.9	0.076	0.903
ESPL1	CENPK	1844556	1843648	9606.ENSP00000257934	9606.ENSP00000242872	0	0	0	0	0.073	0	0.9	0	0.903
CTNNBL1	LSM7	1854287	1844145	9606.ENSP00000355050	9606.ENSP00000252622	0	0	0	0	0.073	0	0.9	0	0.903
FEN1	CCNA2	1848737	1846354	9606.ENSP00000305480	9606.ENSP00000274026	0	0	0	0	0.807	0.415	0	0.207	0.903
PTTG1	CCNA2	1852874	1846354	9606.ENSP00000344936	9606.ENSP00000274026	0	0	0	0	0.846	0	0	0.398	0.903
KIF20A	DLGAP5	1858244	1843859	9606.ENSP00000378356	9606.ENSP00000247191	0	0	0	0	0.858	0.054	0	0.334	0.903
MAD2L1	KIF23	1847745	1844781	9606.ENSP00000296509	9606.ENSP00000260363	0	0	0	0	0.801	0.331	0	0.331	0.903
CHEK1	CDC20	1859362	1849070	9606.ENSP00000388648	9606.ENSP00000308450	0	0	0	0	0.77	0	0	0.598	0.903
NEK2	CEP72	1854493	1845648	9606.ENSP00000355966	9606.ENSP00000264935	0	0	0	0	0.072	0	0.9	0	0.903
CDK11A	PLK4	1858946	1846179	9606.ENSP00000384442	9606.ENSP00000270861	0	0	0	0.626	0.056	0	0.9	0.059	0.902
SSR4	RPL37	1849949	1846368	9606.ENSP00000317331	9606.ENSP00000274242	0	0	0	0	0	0	0.9	0.065	0.902
RAD51	FEN1	1857551	1848737	9606.ENSP00000372088	9606.ENSP00000305480	0.073	0	0	0	0.542	0.292	0	0.714	0.902
CHEK1	FANCD2	1859362	1847078	9606.ENSP00000388648	9606.ENSP00000287647	0	0	0	0	0.331	0.36	0	0.788	0.902
CKS2	CDK4	1856383	1844551	9606.ENSP00000364976	9606.ENSP00000257904	0	0	0	0	0.346	0.667	0	0.585	0.902
RAD51	HIST1H2BK	1857551	1853439	9606.ENSP00000372088	9606.ENSP00000349430	0	0	0	0	0.055	0	0.9	0.048	0.902
CTNNBL1	SNRPF	1854287	1845900	9606.ENSP00000355050	9606.ENSP00000266735	0	0	0	0	0.066	0	0.9	0	0.902
HMGA2	LMNB1	1858894	1844893	9606.ENSP00000384026	9606.ENSP00000261366	0	0	0	0	0	0	0.9	0.063	0.902
CEP55	UBE2C	1855493	1853360	9606.ENSP00000360540	9606.ENSP00000348838	0	0	0	0	0.87	0	0	0.277	0.902
KDELR3	RACGAP1	1859221	1849236	9606.ENSP00000386918	9606.ENSP00000309871	0	0	0	0	0.065	0	0.9	0	0.902
CDK1	DYNLL1	1858283	1843632	9606.ENSP00000378699	9606.ENSP00000242577	0	0	0	0	0.054	0	0.9	0.049	0.902
HIST1H2BK	PLK1	1853439	1848135	9606.ENSP00000349430	9606.ENSP00000300093	0	0	0	0	0.054	0	0.9	0.053	0.902
SKA1	MAD1L1	1846949	1845817	9606.ENSP00000285116	9606.ENSP00000265854	0	0	0	0	0.062	0	0.9	0	0.902
CEP55	NCAPG	1855493	1844063	9606.ENSP00000360540	9606.ENSP00000251496	0	0	0	0	0.872	0	0	0.27	0.902
KIF20A	CDC20	1858244	1849070	9606.ENSP00000378356	9606.ENSP00000308450	0	0	0	0	0.846	0.11	0	0.341	0.902
UBE2C	CDCA8	1853360	1849847	9606.ENSP00000348838	9606.ENSP00000316121	0	0	0	0	0.871	0	0	0.275	0.902
H2AFZ	CBX8	1847723	1846089	9606.ENSP00000296417	9606.ENSP00000269385	0	0	0	0	0	0	0.9	0.061	0.902
RASGRF1	CDK1	1860566	1858283	9606.ENSP00000405963	9606.ENSP00000378699	0	0	0	0	0.048	0	0.9	0.054	0.902
TPX2	ANLN	1848175	1845802	9606.ENSP00000300403	9606.ENSP00000265748	0	0	0	0	0.864	0	0	0.305	0.902
ATP5EP2	AK4	1857322	1850420	9606.ENSP00000370414	9606.ENSP00000322175	0	0	0	0	0.052	0	0.9	0	0.901
ASPM	CCNB1	1854584	1844435	9606.ENSP00000356379	9606.ENSP00000256442	0	0	0	0	0.893	0	0	0.116	0.901
HIST1H2BK	NCAPG2	1853439	1853329	9606.ENSP00000349430	9606.ENSP00000348657	0	0	0	0	0.055	0	0.9	0	0.901
MIB2	CDC34	1861674	1842491	9606.ENSP00000426103	9606.ENSP00000215574	0	0	0	0	0.054	0	0.9	0.047	0.901
CENPW	RSF1	1854781	1849435	9606.ENSP00000357311	9606.ENSP00000311513	0	0	0	0	0	0	0.9	0.054	0.901
CBX8	UBE2S	1846089	1845564	9606.ENSP00000269385	9606.ENSP00000264552	0	0	0	0	0	0	0.9	0.056	0.901
HIST1H2BK	UBE2C	1853439	1853360	9606.ENSP00000349430	9606.ENSP00000348838	0	0	0	0	0.051	0	0.9	0	0.901
MAD1L1	CENPK	1845817	1843648	9606.ENSP00000265854	9606.ENSP00000242872	0	0	0	0	0.053	0	0.9	0	0.901
KDELR3	KIF2C	1859221	1855643	9606.ENSP00000386918	9606.ENSP00000361298	0	0	0	0	0.053	0	0.9	0	0.901
NEK2	DYNLL1	1854493	1843632	9606.ENSP00000355966	9606.ENSP00000242577	0	0	0	0	0.048	0	0.9	0.048	0.901
PLK1	DYNLL1	1848135	1843632	9606.ENSP00000300093	9606.ENSP00000242577	0	0	0	0	0	0	0.9	0.055	0.901
MAGOHB	RPL37	1850128	1846368	9606.ENSP00000319240	9606.ENSP00000274242	0	0	0	0	0.055	0	0.9	0	0.901
TMED3	DYNLL1	1848093	1843632	9606.ENSP00000299705	9606.ENSP00000242577	0	0	0	0	0.053	0	0.9	0	0.901
CENPH	MAD1L1	1846827	1845817	9606.ENSP00000283006	9606.ENSP00000265854	0	0	0	0	0.052	0	0.9	0	0.901
CENPP	HIST1H2BK	1856335	1853439	9606.ENSP00000364737	9606.ENSP00000349430	0	0	0	0	0	0	0.9	0.055	0.901
RACGAP1	DYNLL1	1849236	1843632	9606.ENSP00000309871	9606.ENSP00000242577	0	0	0	0	0.054	0	0.9	0	0.901
KIF20A	CEP55	1858244	1855493	9606.ENSP00000378356	9606.ENSP00000360540	0	0	0	0	0.836	0.103	0	0.38	0.901
SPC24	MAD1L1	1863909	1845817	9606.ENSP00000465075	9606.ENSP00000265854	0	0	0	0	0.055	0	0.9	0	0.901
MAD1L1	CENPM	1845817	1842528	9606.ENSP00000265854	9606.ENSP00000215980	0	0	0	0	0.051	0	0.9	0	0.901
CTNNBL1	POLR2D	1854287	1846274	9606.ENSP00000355050	9606.ENSP00000272645	0	0	0	0	0.056	0	0.9	0	0.901
BUB1B	DLGAP5	1847075	1843859	9606.ENSP00000287598	9606.ENSP00000247191	0	0	0	0	0.855	0	0	0.347	0.901
CENPN	MAD1L1	1858091	1845817	9606.ENSP00000377007	9606.ENSP00000265854	0	0	0	0	0.055	0	0.9	0	0.901
KIF4A	MELK	1856112	1847923	9606.ENSP00000363524	9606.ENSP00000298048	0	0	0	0	0.862	0.088	0	0.278	0.901
KDELR3	KIF11	1859221	1844817	9606.ENSP00000386918	9606.ENSP00000260731	0	0	0	0	0.053	0	0.9	0	0.901
RAN	HIST1H2BK	1857999	1853439	9606.ENSP00000376176	9606.ENSP00000349430	0	0	0	0	0.056	0	0.9	0	0.901
ISG15	KIAA0101	1857024	1848123	9606.ENSP00000368699	9606.ENSP00000300035	0	0	0	0	0	0	0.9	0.054	0.901
KDELR1	RACGAP1	1851154	1849236	9606.ENSP00000329471	9606.ENSP00000309871	0	0	0	0	0.054	0	0.9	0	0.901
MIB2	UBE2C	1861674	1853360	9606.ENSP00000426103	9606.ENSP00000348838	0	0	0	0	0.055	0	0.9	0	0.901
NUP214	CCNB2	1853838	1847117	9606.ENSP00000352400	9606.ENSP00000288207	0	0	0	0	0.052	0	0.9	0	0.901
NMB	HTR2B	1858209	1844597	9606.ENSP00000378089	9606.ENSP00000258400	0	0	0	0	0.054	0	0.9	0	0.901
KDELR3	KIF4A	1859221	1856112	9606.ENSP00000386918	9606.ENSP00000363524	0	0	0	0	0.053	0	0.9	0	0.901
CDK1	CEP72	1858283	1845648	9606.ENSP00000378699	9606.ENSP00000264935	0	0	0	0	0.055	0	0.9	0	0.901
SPC25	MAD1L1	1846768	1845817	9606.ENSP00000282074	9606.ENSP00000265854	0	0	0	0	0.056	0	0.9	0	0.901
HIST1H2BK	CENPH	1853439	1846827	9606.ENSP00000349430	9606.ENSP00000283006	0	0	0	0	0	0	0.9	0.058	0.901
HIST1H2BK	POLR2D	1853439	1846274	9606.ENSP00000349430	9606.ENSP00000272645	0	0	0	0	0	0.052	0.9	0	0.901
HIST1H2BK	MND1	1853439	1843567	9606.ENSP00000349430	9606.ENSP00000240488	0	0	0	0	0.053	0	0.9	0	0.901
CDCA5	MAD1L1	1846446	1845817	9606.ENSP00000275517	9606.ENSP00000265854	0	0	0	0	0.052	0	0.9	0	0.901
STAG3	LMNB1	1850137	1844893	9606.ENSP00000319318	9606.ENSP00000261366	0	0	0	0	0.054	0	0.9	0	0.901
KDELR3	KDELR1	1859221	1851154	9606.ENSP00000386918	9606.ENSP00000329471	0	0	0	0.972	0.055	0	0.9	0.214	0.901
CBX4	UBE2S	1846093	1845564	9606.ENSP00000269397	9606.ENSP00000264552	0	0	0	0	0	0	0.9	0.052	0.901
MIB2	TRAIP	1861674	1851007	9606.ENSP00000426103	9606.ENSP00000328203	0	0	0	0	0.055	0	0.9	0.041	0.901
PYCR1	P4HA2	1851083	1842298	9606.ENSP00000328858	9606.ENSP00000166534	0	0	0	0	0.051	0	0.9	0	0.901
PCNA	CCNO	1856984	1846808	9606.ENSP00000368438	9606.ENSP00000282572	0	0	0	0	0.264	0.745	0	0.514	0.901
KIF20A	ANLN	1858244	1845802	9606.ENSP00000378356	9606.ENSP00000265748	0	0	0	0	0.851	0	0	0.36	0.901
PLK4	DYNLL1	1846179	1843632	9606.ENSP00000270861	9606.ENSP00000242577	0	0	0	0	0	0	0.9	0.051	0.901
TOP2A	CDKN3	1860923	1851839	9606.ENSP00000411532	9606.ENSP00000335357	0	0	0	0	0.86	0	0	0.322	0.901
KDELR3	KIF22	1859221	1842279	9606.ENSP00000386918	9606.ENSP00000160827	0	0	0	0	0.054	0	0.9	0	0.901
HIST1H2BK	CENPK	1853439	1843648	9606.ENSP00000349430	9606.ENSP00000242872	0	0	0	0	0	0	0.9	0.055	0.901
RACGAP1	TMED3	1849236	1848093	9606.ENSP00000309871	9606.ENSP00000299705	0	0	0	0	0.053	0	0.9	0	0.901
CDK11A	DYNLL1	1858946	1843632	9606.ENSP00000384442	9606.ENSP00000242577	0	0	0	0	0.055	0	0.9	0	0.901
HIST1H2BK	LMNB1	1853439	1844893	9606.ENSP00000349430	9606.ENSP00000261366	0	0	0	0	0.051	0	0.9	0.049	0.901
KIF2C	TMED3	1855643	1848093	9606.ENSP00000361298	9606.ENSP00000299705	0	0	0	0	0.054	0	0.9	0	0.901
TRIM2	OASL	1852238	1844517	9606.ENSP00000339659	9606.ENSP00000257570	0	0	0	0	0	0	0.9	0.047	0.9
HIST1H2BK	RSF1	1853439	1849435	9606.ENSP00000349430	9606.ENSP00000311513	0	0	0	0	0	0	0.9	0	0.9
KIF4A	TMED3	1856112	1848093	9606.ENSP00000363524	9606.ENSP00000299705	0	0	0	0	0	0	0.9	0	0.9
NMB	P2RY11	1858209	1850589	9606.ENSP00000378089	9606.ENSP00000323872	0	0	0	0	0	0	0.9	0	0.9
NUP214	GEMIN7	1853838	1846143	9606.ENSP00000352400	9606.ENSP00000270257	0	0	0	0	0	0	0.9	0	0.9
RSF1	OIP5	1849435	1842788	9606.ENSP00000311513	9606.ENSP00000220514	0	0	0	0	0	0	0.9	0	0.9
MIB2	TRIM50	1861674	1850979	9606.ENSP00000426103	9606.ENSP00000327994	0	0	0	0	0	0	0.9	0	0.9
POLR2D	LIG1	1846274	1845325	9606.ENSP00000272645	9606.ENSP00000263274	0	0	0	0	0	0	0.9	0	0.9
RRM2	PBK	1854033	1848348	9606.ENSP00000353770	9606.ENSP00000301905	0	0	0	0	0.881	0	0	0.192	0.9
RASGRF1	CCNB1	1860566	1844435	9606.ENSP00000405963	9606.ENSP00000256442	0	0	0	0	0	0	0.9	0	0.9
NUP214	MAGOHB	1853838	1850128	9606.ENSP00000352400	9606.ENSP00000319240	0	0	0	0	0	0	0.9	0	0.9
FBXO2	SOCS1	1853030	1851146	9606.ENSP00000346240	9606.ENSP00000329418	0	0	0	0	0	0	0.9	0	0.9
KIF20A	KDELR1	1858244	1851154	9606.ENSP00000378356	9606.ENSP00000329471	0	0	0	0	0	0	0.9	0	0.9
CDCA8	MELK	1849847	1847923	9606.ENSP00000316121	9606.ENSP00000298048	0	0	0	0	0.868	0	0	0.277	0.9
VCAM1	OAS3	1847502	1843172	9606.ENSP00000294728	9606.ENSP00000228928	0	0	0	0	0	0	0.9	0.044	0.9
HIST1H2BK	CENPM	1853439	1842528	9606.ENSP00000349430	9606.ENSP00000215980	0	0	0	0	0	0	0.9	0.047	0.9
HIST1H2BK	CBX4	1853439	1846093	9606.ENSP00000349430	9606.ENSP00000269397	0	0	0	0	0	0	0.9	0	0.9
HIST1H2BK	OIP5	1853439	1842788	9606.ENSP00000349430	9606.ENSP00000220514	0	0	0	0	0	0	0.9	0	0.9
HIST1H2BK	CBX3	1853439	1851906	9606.ENSP00000349430	9606.ENSP00000336687	0	0	0	0	0	0	0.9	0.049	0.9
CES4A	E2F1	1862263	1852951	9606.ENSP00000444052	9606.ENSP00000345571	0	0	0	0	0	0	0.9	0	0.9
RRM2	MELK	1854033	1847923	9606.ENSP00000353770	9606.ENSP00000298048	0	0	0	0	0.876	0	0	0.228	0.9
UBE2C	FBXO2	1853360	1853030	9606.ENSP00000348838	9606.ENSP00000346240	0	0	0	0	0	0	0.9	0	0.9
HIST1H2BK	MLF1IP	1853439	1846726	9606.ENSP00000349430	9606.ENSP00000281453	0	0	0	0	0	0	0.9	0.049	0.9
UBE2C	CBX8	1853360	1846089	9606.ENSP00000348838	9606.ENSP00000269385	0	0	0	0	0	0	0.9	0	0.9
HJURP	HIST1H2BK	1861060	1853439	9606.ENSP00000414109	9606.ENSP00000349430	0	0	0	0	0	0	0.9	0	0.9
RSF1	CENPM	1849435	1842528	9606.ENSP00000311513	9606.ENSP00000215980	0	0	0	0	0	0	0.9	0	0.9
CENPN	HIST1H2BK	1858091	1853439	9606.ENSP00000377007	9606.ENSP00000349430	0	0	0	0	0	0	0.9	0	0.9
REC8	LMNB1	1849097	1844893	9606.ENSP00000308699	9606.ENSP00000261366	0	0	0	0	0	0	0.9	0	0.9
CENPN	RSF1	1858091	1849435	9606.ENSP00000377007	9606.ENSP00000311513	0	0	0	0	0	0	0.9	0.048	0.9
UBE2C	TRIM50	1853360	1850979	9606.ENSP00000348838	9606.ENSP00000327994	0	0	0	0	0	0	0.9	0	0.9
TMED3	KIF11	1848093	1844817	9606.ENSP00000299705	9606.ENSP00000260731	0	0	0	0	0	0	0.9	0	0.9
KDELR1	DYNLL1	1851154	1843632	9606.ENSP00000329471	9606.ENSP00000242577	0	0	0	0	0.048	0	0.9	0.042	0.9
COL4A3	P4HA2	1858404	1842298	9606.ENSP00000379823	9606.ENSP00000166534	0	0	0	0	0.043	0	0.9	0	0.9
UBE2C	BUB1	1853360	1848415	9606.ENSP00000348838	9606.ENSP00000302530	0	0	0	0	0.85	0	0	0.364	0.9
MUC12	GALNTL4	1862198	1843126	9606.ENSP00000441929	9606.ENSP00000227756	0	0	0	0	0	0	0.9	0	0.9
FBXO2	TRIM50	1853030	1850979	9606.ENSP00000346240	9606.ENSP00000327994	0	0	0	0	0	0	0.9	0	0.9
KIF4A	KDELR1	1856112	1851154	9606.ENSP00000363524	9606.ENSP00000329471	0	0	0	0	0	0	0.9	0	0.9
CCNF	TRIM50	1858453	1850979	9606.ENSP00000380256	9606.ENSP00000327994	0	0	0	0	0	0	0.9	0	0.9
CENPW	HIST1H2BK	1854781	1853439	9606.ENSP00000357311	9606.ENSP00000349430	0	0	0	0	0	0	0.9	0	0.9
CDK11A	CEP72	1858946	1845648	9606.ENSP00000384442	9606.ENSP00000264935	0	0	0	0	0	0	0.9	0	0.9
PCYOX1L	RARRES2	1846397	1842971	9606.ENSP00000274569	9606.ENSP00000223271	0	0	0	0	0	0	0.9	0	0.9
TRIM50	CDC20	1850979	1849070	9606.ENSP00000327994	9606.ENSP00000308450	0	0	0	0	0	0	0.9	0	0.9
CDK1	KIAA0101	1858283	1848123	9606.ENSP00000378699	9606.ENSP00000300035	0	0	0	0	0.884	0	0	0.177	0.9
PLA2G4B	PAFAH1B3	1859907	1845235	9606.ENSP00000396045	9606.ENSP00000262890	0	0	0	0	0	0	0.9	0	0.9
UBE2C	CBX4	1853360	1846093	9606.ENSP00000348838	9606.ENSP00000269397	0	0	0	0	0	0	0.9	0	0.9
NUP214	THOC1	1853838	1844947	9606.ENSP00000352400	9606.ENSP00000261600	0	0	0	0	0	0	0.9	0.05	0.9
KDELR1	KIF22	1851154	1842279	9606.ENSP00000329471	9606.ENSP00000160827	0	0	0	0	0.05	0	0.9	0	0.9
RSF1	MLF1IP	1849435	1846726	9606.ENSP00000311513	9606.ENSP00000281453	0	0	0	0	0	0	0.9	0	0.9
SOCS1	TRIM50	1851146	1850979	9606.ENSP00000329418	9606.ENSP00000327994	0	0	0	0	0	0	0.9	0.046	0.9
TRAIP	TRIM50	1851007	1850979	9606.ENSP00000328203	9606.ENSP00000327994	0	0	0	0	0	0	0.9	0	0.9
OAS1	TRIM2	1859322	1852238	9606.ENSP00000388001	9606.ENSP00000339659	0	0	0	0	0	0	0.9	0.047	0.9
NUP214	SNRPF	1853838	1845900	9606.ENSP00000352400	9606.ENSP00000266735	0	0	0	0	0	0	0.9	0	0.9
FBXO2	TRAIP	1853030	1851007	9606.ENSP00000346240	9606.ENSP00000328203	0	0	0	0	0	0	0.9	0	0.9
CENPP	RSF1	1856335	1849435	9606.ENSP00000364737	9606.ENSP00000311513	0	0	0	0	0	0	0.9	0	0.9
PCYOX1L	SPARC	1846397	1843274	9606.ENSP00000274569	9606.ENSP00000231061	0	0	0	0	0	0	0.9	0	0.9
TMED3	KIF22	1848093	1842279	9606.ENSP00000299705	9606.ENSP00000160827	0	0	0	0	0	0	0.9	0	0.9
PLD3	DGKA	1853368	1851035	9606.ENSP00000348901	9606.ENSP00000328405	0	0	0	0	0	0	0.9	0	0.9
RSF1	CENPK	1849435	1843648	9606.ENSP00000311513	9606.ENSP00000242872	0	0	0	0	0	0	0.9	0	0.9
KDELR1	KIF23	1851154	1844781	9606.ENSP00000329471	9606.ENSP00000260363	0	0	0	0	0	0	0.9	0	0.9
P2RY11	HTR2B	1850589	1844597	9606.ENSP00000323872	9606.ENSP00000258400	0	0	0	0	0	0	0.9	0	0.9
KDELR1	KIF11	1851154	1844817	9606.ENSP00000329471	9606.ENSP00000260731	0	0	0	0	0.042	0	0.9	0	0.9
SOCS1	TRAIP	1851146	1851007	9606.ENSP00000329418	9606.ENSP00000328203	0	0	0	0	0	0	0.9	0.049	0.9
TRIM50	CDC34	1850979	1842491	9606.ENSP00000327994	9606.ENSP00000215574	0	0	0	0	0	0	0.9	0	0.9
KIF2C	KDELR1	1855643	1851154	9606.ENSP00000361298	9606.ENSP00000329471	0	0	0	0	0	0	0.9	0	0.9
PRC1	CDCA8	1858173	1849847	9606.ENSP00000377793	9606.ENSP00000316121	0	0	0	0	0.862	0	0	0.304	0.9
RHOF	DEPDC1B	1845928	1845672	9606.ENSP00000267205	9606.ENSP00000265036	0	0	0	0	0	0	0.9	0	0.9
KDELR3	DYNLL1	1859221	1843632	9606.ENSP00000386918	9606.ENSP00000242577	0	0	0	0	0	0	0.9	0	0.9
PSMC3IP	HIST1H2BK	1858126	1853439	9606.ENSP00000377384	9606.ENSP00000349430	0	0	0	0	0	0	0.9	0	0.9
MIB2	UBE2S	1861674	1845564	9606.ENSP00000426103	9606.ENSP00000264552	0	0	0	0	0	0	0.9	0	0.9
CCNF	SOCS1	1858453	1851146	9606.ENSP00000380256	9606.ENSP00000329418	0	0	0	0	0	0	0.9	0.047	0.9
KDELR3	KIF23	1859221	1844781	9606.ENSP00000386918	9606.ENSP00000260363	0	0	0	0	0	0	0.9	0	0.9
ATG14	DYNLL1	1843857	1843632	9606.ENSP00000247178	9606.ENSP00000242577	0	0	0	0	0	0	0.9	0	0.9
NUP214	THOC3	1853838	1845690	9606.ENSP00000352400	9606.ENSP00000265097	0	0	0	0	0	0	0.9	0.045	0.9
MLF1IP	MAD1L1	1846726	1845817	9606.ENSP00000281453	9606.ENSP00000265854	0	0	0	0	0	0	0.9	0	0.9
RPL37	WDR18	1846368	1844048	9606.ENSP00000274242	9606.ENSP00000251289	0	0	0	0	0	0	0.9	0	0.9
TMED3	KIF23	1848093	1844781	9606.ENSP00000299705	9606.ENSP00000260363	0	0	0	0	0	0	0.9	0	0.9
AURKB	NUP214	1863844	1853838	9606.ENSP00000463999	9606.ENSP00000352400	0	0	0	0	0.045	0	0.9	0	0.9
MUC12	B3GNT9	1862198	1860208	9606.ENSP00000441929	9606.ENSP00000400157	0	0	0	0	0	0	0.9	0	0.9
ISG15	POLE2	1857024	1842589	9606.ENSP00000368699	9606.ENSP00000216367	0	0	0	0	0	0	0.9	0.05	0.9
H2AFZ	CBX4	1847723	1846093	9606.ENSP00000296417	9606.ENSP00000269397	0	0	0	0	0	0	0.9	0.048	0.9
TRIM2	OAS3	1852238	1843172	9606.ENSP00000339659	9606.ENSP00000228928	0	0	0	0	0	0	0.9	0.047	0.9
NEK6	NUP214	1855945	1853838	9606.ENSP00000362702	9606.ENSP00000352400	0	0	0	0	0	0	0.9	0	0.9
PLA2G4B	CYP2C8	1859907	1855452	9606.ENSP00000396045	9606.ENSP00000360317	0	0	0	0	0	0	0.9	0	0.9
CENPP	MAD1L1	1856335	1845817	9606.ENSP00000364737	9606.ENSP00000265854	0	0	0	0	0.049	0	0.9	0	0.9
TPX2	DYNLL1	1848175	1843632	9606.ENSP00000300403	9606.ENSP00000242577	0	0	0	0	0	0	0.9	0	0.9
KIF20A	TMED3	1858244	1848093	9606.ENSP00000378356	9606.ENSP00000299705	0	0	0	0	0	0	0.9	0	0.9
PTHLH	P2RY11	1858343	1850589	9606.ENSP00000379213	9606.ENSP00000323872	0	0	0	0	0	0	0.9	0	0.9
KDELR3	KIF20A	1859221	1858244	9606.ENSP00000386918	9606.ENSP00000378356	0	0	0	0	0	0	0.9	0	0.9
TPX2	CEP72	1848175	1845648	9606.ENSP00000300403	9606.ENSP00000264935	0	0	0	0	0.049	0	0.9	0	0.9
TRIM2	VCAM1	1852238	1847502	9606.ENSP00000339659	9606.ENSP00000294728	0	0	0	0	0	0	0.9	0	0.9
UBE2C	SOCS1	1853360	1851146	9606.ENSP00000348838	9606.ENSP00000329418	0	0	0	0	0	0	0.9	0	0.9
NUP214	CDCA8	1853838	1849847	9606.ENSP00000352400	9606.ENSP00000316121	0	0	0	0	0	0	0.9	0	0.9
CDC45	CCNA2	1860553	1846354	9606.ENSP00000405726	9606.ENSP00000274026	0	0	0	0	0.827	0.065	0	0.423	0.899
CDKN3	DLGAP5	1851839	1843859	9606.ENSP00000335357	9606.ENSP00000247191	0	0	0	0	0.887	0	0	0.141	0.899
CDC20	DLGAP5	1849070	1843859	9606.ENSP00000308450	9606.ENSP00000247191	0	0	0	0	0.854	0	0	0.338	0.899
KIF4A	AURKA	1856112	1842628	9606.ENSP00000363524	9606.ENSP00000216911	0	0	0	0	0.85	0.116	0	0.302	0.899
PBK	NCAPG	1848348	1844063	9606.ENSP00000301905	9606.ENSP00000251496	0	0	0	0	0.874	0	0	0.233	0.899
PTTG1	CDKN3	1852874	1851839	9606.ENSP00000344936	9606.ENSP00000335357	0	0	0	0	0.872	0	0	0.245	0.899
KIAA0101	CCNB2	1848123	1847117	9606.ENSP00000300035	9606.ENSP00000288207	0	0	0	0	0.892	0	0	0.104	0.899
CDCA8	CCNA2	1849847	1846354	9606.ENSP00000316121	9606.ENSP00000274026	0	0	0	0	0.86	0	0	0.304	0.898
TOP2A	EXO1	1860923	1849472	9606.ENSP00000411532	9606.ENSP00000311873	0.056	0	0	0	0.744	0.066	0	0.604	0.898
CEP55	TPX2	1855493	1848175	9606.ENSP00000360540	9606.ENSP00000300403	0	0	0	0	0.854	0	0	0.329	0.898
NEK2	CCNB1	1854493	1844435	9606.ENSP00000355966	9606.ENSP00000256442	0	0	0	0	0.822	0.07	0	0.435	0.898
UBE2C	CENPA	1853360	1851939	9606.ENSP00000348838	9606.ENSP00000336868	0	0	0	0	0.863	0	0	0.29	0.898
KIF4A	CCNB2	1856112	1847117	9606.ENSP00000363524	9606.ENSP00000288207	0	0	0	0	0.843	0.123	0	0.323	0.898
CDC45	DTL	1860553	1854490	9606.ENSP00000405726	9606.ENSP00000355958	0	0	0	0	0.885	0	0	0.15	0.898
TOP2A	KIF2C	1860923	1855643	9606.ENSP00000411532	9606.ENSP00000361298	0	0	0	0	0.86	0	0	0.3	0.898
NCAPG	AURKA	1844063	1842628	9606.ENSP00000251496	9606.ENSP00000216911	0	0	0	0	0.871	0	0	0.238	0.897
PBK	AURKA	1848348	1842628	9606.ENSP00000301905	9606.ENSP00000216911	0	0	0	0	0.869	0	0	0.247	0.897
CDC45	CDC20	1860553	1849070	9606.ENSP00000405726	9606.ENSP00000308450	0	0	0	0	0.838	0	0	0.394	0.897
NDC80	NCAPH	1844946	1843566	9606.ENSP00000261597	9606.ENSP00000240423	0	0	0	0	0.879	0	0	0.19	0.897
DTL	EXO1	1854490	1849472	9606.ENSP00000355958	9606.ENSP00000311873	0	0	0	0	0.893	0	0	0.074	0.897
ANLN	ECT2	1845802	1843313	9606.ENSP00000265748	9606.ENSP00000232458	0	0	0	0	0.62	0	0	0.741	0.897
CEP55	RRM2	1855493	1854033	9606.ENSP00000360540	9606.ENSP00000353770	0	0	0	0	0.87	0	0	0.236	0.897
CEP55	MELK	1855493	1847923	9606.ENSP00000360540	9606.ENSP00000298048	0	0	0	0	0.87	0	0	0.24	0.897
TTK	CDKN3	1855108	1851839	9606.ENSP00000358813	9606.ENSP00000335357	0	0	0	0	0.865	0.145	0	0.183	0.897
RRM2	MCM2	1854033	1845676	9606.ENSP00000353770	9606.ENSP00000265056	0	0	0	0	0.854	0	0	0.324	0.897
TPX2	BUB1B	1848175	1847075	9606.ENSP00000300403	9606.ENSP00000287598	0	0	0	0	0.845	0	0	0.364	0.897
DTL	RRM2	1854490	1854033	9606.ENSP00000355958	9606.ENSP00000353770	0	0	0	0	0.861	0.176	0	0.161	0.896
CCNB2	PLK4	1847117	1846179	9606.ENSP00000288207	9606.ENSP00000270861	0	0	0	0	0.795	0.171	0	0.439	0.896
CDC20	CDC25A	1849070	1848560	9606.ENSP00000308450	9606.ENSP00000303706	0	0	0	0	0.367	0.669	0	0.545	0.896
UBE2C	DLGAP5	1853360	1843859	9606.ENSP00000348838	9606.ENSP00000247191	0	0	0	0	0.861	0	0	0.28	0.896
SPAG5	AURKA	1850533	1842628	9606.ENSP00000323300	9606.ENSP00000216911	0	0	0	0	0.79	0	0	0.525	0.896
NCAPG2	MCM3	1853329	1843226	9606.ENSP00000348657	9606.ENSP00000229854	0	0	0	0	0.886	0	0	0.127	0.896
PRC1	MELK	1858173	1847923	9606.ENSP00000377793	9606.ENSP00000298048	0	0	0	0	0.846	0.142	0	0.277	0.896
HJURP	CDK1	1861060	1858283	9606.ENSP00000414109	9606.ENSP00000378699	0	0	0	0	0.813	0	0	0.468	0.896
KIF2C	CEP55	1855643	1855493	9606.ENSP00000361298	9606.ENSP00000360540	0	0	0	0	0.84	0.071	0	0.356	0.896
PCNA	ISG20	1856984	1848861	9606.ENSP00000368438	9606.ENSP00000306565	0.309	0	0	0	0	0.671	0.414	0.313	0.896
PBK	TPX2	1848348	1848175	9606.ENSP00000301905	9606.ENSP00000300403	0	0	0	0	0.88	0	0	0.163	0.896
MELK	ANLN	1847923	1845802	9606.ENSP00000298048	9606.ENSP00000265748	0	0	0	0	0.868	0	0	0.236	0.895
KIF20A	NDC80	1858244	1844946	9606.ENSP00000378356	9606.ENSP00000261597	0	0	0	0	0.86	0.067	0	0.26	0.895
AURKB	RRM2	1863844	1854033	9606.ENSP00000463999	9606.ENSP00000353770	0	0	0	0	0.864	0	0	0.259	0.895
CDK1	FEN1	1858283	1848737	9606.ENSP00000378699	9606.ENSP00000305480	0	0	0	0	0.77	0.416	0	0.283	0.895
CDC45	ANKRD32	1860553	1845700	9606.ENSP00000405726	9606.ENSP00000265140	0	0	0	0	0.372	0.669	0	0.533	0.894
RUVBL2	ZNHIT1	1864926	1848654	9606.ENSP00000473172	9606.ENSP00000304593	0	0	0	0	0.111	0.738	0.54	0.133	0.894
CDK1	ASPM	1858283	1854584	9606.ENSP00000378699	9606.ENSP00000356379	0	0	0	0	0.878	0	0	0.17	0.894
PRC1	PTTG1	1858173	1852874	9606.ENSP00000377793	9606.ENSP00000344936	0	0	0	0	0.859	0	0	0.272	0.894
CDC45	CDK4	1860553	1844551	9606.ENSP00000405726	9606.ENSP00000257904	0	0	0	0	0.219	0.774	0	0.448	0.894
SMC4	MCM3	1852454	1843226	9606.ENSP00000341382	9606.ENSP00000229854	0	0	0	0	0.88	0	0	0.157	0.894
RRM2	TRIP13	1854033	1842297	9606.ENSP00000353770	9606.ENSP00000166345	0	0	0	0	0.836	0	0.274	0.185	0.894
PBK	KIF11	1848348	1844817	9606.ENSP00000301905	9606.ENSP00000260731	0	0	0	0	0.865	0.088	0	0.195	0.893
FOXM1	AURKA	1852579	1842628	9606.ENSP00000342307	9606.ENSP00000216911	0	0	0	0	0.757	0	0	0.576	0.893
RRM2	TPX2	1854033	1848175	9606.ENSP00000353770	9606.ENSP00000300403	0	0	0	0	0.872	0	0	0.199	0.893
HMMR	ANLN	1858139	1845802	9606.ENSP00000377492	9606.ENSP00000265748	0	0	0	0	0.87	0	0	0.211	0.893
PRC1	NDC80	1858173	1844946	9606.ENSP00000377793	9606.ENSP00000261597	0	0	0	0	0.86	0	0	0.266	0.893
TOP2A	PLK4	1860923	1846179	9606.ENSP00000411532	9606.ENSP00000270861	0	0	0	0	0.872	0	0	0.195	0.893
CEP55	TTK	1855493	1855108	9606.ENSP00000360540	9606.ENSP00000358813	0	0	0	0	0.876	0	0	0.171	0.893
AURKB	CDC25C	1863844	1850370	9606.ENSP00000463999	9606.ENSP00000321656	0	0	0	0	0.675	0	0	0.686	0.893
ASPM	CCNA2	1854584	1846354	9606.ENSP00000356379	9606.ENSP00000274026	0	0	0	0	0.89	0	0	0.067	0.893
CENPA	KIF11	1851939	1844817	9606.ENSP00000336868	9606.ENSP00000260731	0	0	0	0	0.816	0.096	0	0.401	0.892
TPX2	CCNA2	1848175	1846354	9606.ENSP00000300403	9606.ENSP00000274026	0	0	0	0	0.861	0	0	0.253	0.892
RRM2	FEN1	1854033	1848737	9606.ENSP00000353770	9606.ENSP00000305480	0	0	0	0	0.853	0	0	0.294	0.892
TOP2A	SPC25	1860923	1846768	9606.ENSP00000411532	9606.ENSP00000282074	0	0	0	0	0.886	0	0	0.086	0.892
KIF20A	BUB1B	1858244	1847075	9606.ENSP00000378356	9606.ENSP00000287598	0	0	0	0	0.833	0.178	0	0.279	0.892
RACGAP1	BUB1	1849236	1848415	9606.ENSP00000309871	9606.ENSP00000302530	0	0	0	0	0.858	0	0	0.275	0.892
PRC1	RRM2	1858173	1854033	9606.ENSP00000377793	9606.ENSP00000353770	0	0	0	0	0.868	0	0	0.21	0.892
KIF2C	MELK	1855643	1847923	9606.ENSP00000361298	9606.ENSP00000298048	0	0	0	0	0.837	0.088	0	0.333	0.892
PBK	NDC80	1848348	1844946	9606.ENSP00000301905	9606.ENSP00000261597	0	0	0	0	0.88	0	0	0.135	0.892
CDC45	KIF11	1860553	1844817	9606.ENSP00000405726	9606.ENSP00000260731	0	0	0	0	0.877	0.044	0	0.153	0.891
KIF4A	CDC20	1856112	1849070	9606.ENSP00000363524	9606.ENSP00000308450	0	0	0	0	0.825	0.11	0	0.357	0.891
CEP55	PBK	1855493	1848348	9606.ENSP00000360540	9606.ENSP00000301905	0	0	0	0	0.872	0	0	0.185	0.891
CENPA	MELK	1851939	1847923	9606.ENSP00000336868	9606.ENSP00000298048	0	0	0	0	0.842	0.065	0	0.322	0.891
KIF20A	PTTG1	1858244	1852874	9606.ENSP00000378356	9606.ENSP00000344936	0	0	0	0	0.874	0	0	0.173	0.891
KIF20A	PBK	1858244	1848348	9606.ENSP00000378356	9606.ENSP00000301905	0	0	0	0	0.859	0.088	0	0.218	0.891
CEP55	PLK1	1855493	1848135	9606.ENSP00000360540	9606.ENSP00000300093	0	0	0	0	0.546	0.324	0	0.674	0.891
ASPM	EXO1	1854584	1849472	9606.ENSP00000356379	9606.ENSP00000311873	0	0	0	0	0.891	0	0	0	0.891
UBE2C	KIF11	1853360	1844817	9606.ENSP00000348838	9606.ENSP00000260731	0	0	0	0	0.856	0	0	0.272	0.891
CDC20	MELK	1849070	1847923	9606.ENSP00000308450	9606.ENSP00000298048	0	0	0	0	0.863	0	0	0.238	0.891
PRC1	OIP5	1858173	1842788	9606.ENSP00000377793	9606.ENSP00000220514	0	0	0	0	0.884	0	0	0.09	0.891
PRC1	ANLN	1858173	1845802	9606.ENSP00000377793	9606.ENSP00000265748	0	0	0	0	0.82	0	0	0.411	0.89
HMMR	CEP55	1858139	1855493	9606.ENSP00000377492	9606.ENSP00000360540	0	0	0	0	0.872	0	0	0.18	0.89
KIF23	MCM3	1844781	1843226	9606.ENSP00000260363	9606.ENSP00000229854	0	0	0	0	0.878	0	0	0.141	0.89
SUV39H1	CBX3	1856539	1851906	9606.ENSP00000365877	9606.ENSP00000336687	0	0	0	0	0.053	0.455	0	0.804	0.89
CCNA2	NCAPG	1846354	1844063	9606.ENSP00000274026	9606.ENSP00000251496	0	0	0	0	0.87	0	0	0.188	0.89
TOP2A	ANLN	1860923	1845802	9606.ENSP00000411532	9606.ENSP00000265748	0	0	0	0	0.86	0	0	0.243	0.89
TYMS	AURKA	1849803	1842628	9606.ENSP00000315644	9606.ENSP00000216911	0	0	0	0	0.861	0	0	0.241	0.89
RRM2	CDKN3	1854033	1851839	9606.ENSP00000353770	9606.ENSP00000335357	0	0	0	0	0.873	0	0	0.167	0.89
CHEK1	NCAPG	1859362	1844063	9606.ENSP00000388648	9606.ENSP00000251496	0	0	0	0	0.879	0	0	0.127	0.89
CCNB2	TRIP13	1847117	1842297	9606.ENSP00000288207	9606.ENSP00000166345	0	0	0	0	0.848	0.192	0	0.171	0.889
TTK	PBK	1855108	1848348	9606.ENSP00000358813	9606.ENSP00000301905	0	0	0	0	0.872	0	0	0.166	0.889
RRM2	AURKA	1854033	1842628	9606.ENSP00000353770	9606.ENSP00000216911	0	0	0	0	0.85	0	0	0.295	0.889
KIF2C	NCAPG	1855643	1844063	9606.ENSP00000361298	9606.ENSP00000251496	0	0	0	0	0.852	0.066	0	0.257	0.889
TTK	PLK4	1855108	1846179	9606.ENSP00000358813	9606.ENSP00000270861	0	0	0	0.622	0.861	0.168	0	0.25	0.889
KIF4A	BUB1B	1856112	1847075	9606.ENSP00000363524	9606.ENSP00000287598	0	0	0	0	0.824	0.178	0	0.298	0.889
CENPA	TPX2	1851939	1848175	9606.ENSP00000336868	9606.ENSP00000300403	0	0	0	0	0.834	0	0	0.358	0.889
CDK1	DTL	1858283	1854490	9606.ENSP00000378699	9606.ENSP00000355958	0	0	0	0	0.861	0	0	0.238	0.889
NCAPG2	NCAPG	1853329	1844063	9606.ENSP00000348657	9606.ENSP00000251496	0	0	0	0	0.753	0	0	0.571	0.889
ASPM	CDC20	1854584	1849070	9606.ENSP00000356379	9606.ENSP00000308450	0	0	0	0	0.871	0	0	0.167	0.888
PRC1	UBE2C	1858173	1853360	9606.ENSP00000377793	9606.ENSP00000348838	0	0	0	0	0.857	0	0	0.25	0.888
CDC20	PLK4	1849070	1846179	9606.ENSP00000308450	9606.ENSP00000270861	0	0	0	0	0.816	0.169	0	0.327	0.888
MELK	NCAPG	1847923	1844063	9606.ENSP00000298048	9606.ENSP00000251496	0	0	0	0	0.869	0	0	0.185	0.888
TOP2A	FOXM1	1860923	1852579	9606.ENSP00000411532	9606.ENSP00000342307	0	0	0	0	0.787	0.36	0	0.248	0.888
PBK	OIP5	1848348	1842788	9606.ENSP00000301905	9606.ENSP00000220514	0	0	0	0	0.871	0	0	0.167	0.888
DLGAP5	OIP5	1843859	1842788	9606.ENSP00000247191	9606.ENSP00000220514	0	0	0	0	0.866	0	0	0.2	0.888
KIF20A	MELK	1858244	1847923	9606.ENSP00000378356	9606.ENSP00000298048	0	0	0	0	0.852	0.088	0	0.239	0.888
MLF1	MLF1IP	1858046	1846726	9606.ENSP00000376568	9606.ENSP00000281453	0	0	0	0	0	0.36	0	0.831	0.887
PLK1	CDC6	1848135	1842453	9606.ENSP00000300093	9606.ENSP00000209728	0	0	0	0	0.418	0.36	0	0.719	0.887
CDKN3	KIAA0101	1851839	1848123	9606.ENSP00000335357	9606.ENSP00000300035	0	0	0	0	0.868	0	0	0.177	0.887
HMMR	PBK	1858139	1848348	9606.ENSP00000377492	9606.ENSP00000301905	0	0	0	0	0.871	0	0	0.16	0.887
ASPM	PBK	1854584	1848348	9606.ENSP00000356379	9606.ENSP00000301905	0	0	0	0	0.883	0	0	0.075	0.887
ASPM	DLGAP5	1854584	1843859	9606.ENSP00000356379	9606.ENSP00000247191	0	0	0	0	0.887	0	0	0	0.887
KIAA0101	MELK	1848123	1847923	9606.ENSP00000300035	9606.ENSP00000298048	0	0	0	0	0.876	0	0	0.126	0.887
CDC20	PBK	1849070	1848348	9606.ENSP00000308450	9606.ENSP00000301905	0	0	0	0	0.866	0	0	0.191	0.887
NEK2	KIF11	1854493	1844817	9606.ENSP00000355966	9606.ENSP00000260731	0	0	0	0	0.817	0.046	0	0.406	0.887
BUB1	CDC6	1848415	1842453	9606.ENSP00000302530	9606.ENSP00000209728	0	0	0	0	0.795	0.17	0	0.39	0.887
ASPM	TPX2	1854584	1848175	9606.ENSP00000356379	9606.ENSP00000300403	0	0	0	0	0.871	0	0	0.15	0.886
DTL	NCAPG	1854490	1844063	9606.ENSP00000355958	9606.ENSP00000251496	0	0	0	0	0.877	0	0	0.112	0.886
FOXM1	TPX2	1852579	1848175	9606.ENSP00000342307	9606.ENSP00000300403	0	0	0	0	0.867	0	0	0.183	0.886
CDC45	UBE2C	1860553	1853360	9606.ENSP00000405726	9606.ENSP00000348838	0	0	0	0	0.862	0	0	0.206	0.886
CEP55	BUB1B	1855493	1847075	9606.ENSP00000360540	9606.ENSP00000287598	0	0	0	0	0.849	0	0	0.277	0.886
BUB1B	KIF23	1847075	1844781	9606.ENSP00000287598	9606.ENSP00000260363	0	0	0	0	0.812	0.178	0	0.324	0.886
CDC20	TRIP13	1849070	1842297	9606.ENSP00000308450	9606.ENSP00000166345	0	0	0	0	0.814	0.285	0	0.213	0.886
CDKN3	CDC6	1851839	1842453	9606.ENSP00000335357	9606.ENSP00000209728	0	0	0	0	0.613	0.538	0	0.413	0.886
CEP55	CCNA2	1855493	1846354	9606.ENSP00000360540	9606.ENSP00000274026	0	0	0	0	0.865	0	0	0.189	0.886
CDC20	NCAPG	1849070	1844063	9606.ENSP00000308450	9606.ENSP00000251496	0	0	0	0	0.849	0	0	0.277	0.886
ASPM	AURKA	1854584	1842628	9606.ENSP00000356379	9606.ENSP00000216911	0	0	0	0	0.878	0	0	0.106	0.886
ASPM	CDKN3	1854584	1851839	9606.ENSP00000356379	9606.ENSP00000335357	0	0	0	0	0.885	0	0	0	0.886
CDC45	EXO1	1860553	1849472	9606.ENSP00000405726	9606.ENSP00000311873	0	0	0	0	0.864	0	0	0.199	0.886
MELK	KIF11	1847923	1844817	9606.ENSP00000298048	9606.ENSP00000260731	0	0	0	0	0.853	0.088	0	0.218	0.886
H2AFY2	CENPA	1855864	1851939	9606.ENSP00000362352	9606.ENSP00000336868	0	0	0	0	0.551	0.394	0	0.615	0.886
KIF4A	CCNB1	1856112	1844435	9606.ENSP00000363524	9606.ENSP00000256442	0	0	0	0	0.822	0.123	0	0.325	0.886
ASPM	RRM2	1854584	1854033	9606.ENSP00000356379	9606.ENSP00000353770	0	0	0	0	0.876	0	0	0.116	0.885
AURKB	MCM5	1863844	1842548	9606.ENSP00000463999	9606.ENSP00000216122	0	0	0	0	0.864	0	0	0.193	0.885
PRC1	TPX2	1858173	1848175	9606.ENSP00000377793	9606.ENSP00000300403	0	0	0	0	0.845	0	0	0.29	0.885
KIF20A	TTK	1858244	1855108	9606.ENSP00000378356	9606.ENSP00000358813	0	0	0	0	0.844	0.067	0	0.269	0.884
CCNF	CKS2	1858453	1856383	9606.ENSP00000380256	9606.ENSP00000364976	0	0	0	0	0.246	0.678	0	0.562	0.884
CDK1	SPAG5	1858283	1850533	9606.ENSP00000378699	9606.ENSP00000323300	0	0	0	0	0.796	0.36	0	0.181	0.884
PCNA	CKS2	1856984	1856383	9606.ENSP00000368438	9606.ENSP00000364976	0	0	0	0	0.832	0	0	0.339	0.884
CDC45	CEP55	1860553	1855493	9606.ENSP00000405726	9606.ENSP00000360540	0	0	0	0	0.847	0.214	0	0.112	0.884
KIF20A	MCM3	1858244	1843226	9606.ENSP00000378356	9606.ENSP00000229854	0	0	0	0	0.881	0	0	0.068	0.884
BUB1	KIAA0101	1848415	1848123	9606.ENSP00000302530	9606.ENSP00000300035	0	0	0	0	0.875	0	0	0.106	0.884
UBE2C	KIAA0101	1853360	1848123	9606.ENSP00000348838	9606.ENSP00000300035	0	0	0	0	0.869	0	0	0.152	0.884
CEP55	MAD2L1	1855493	1847745	9606.ENSP00000360540	9606.ENSP00000296509	0	0	0	0	0.86	0	0	0.207	0.884
CHEK1	PBK	1859362	1848348	9606.ENSP00000388648	9606.ENSP00000301905	0	0	0	0	0.852	0.172	0	0.124	0.884
CEP55	CDC20	1855493	1849070	9606.ENSP00000360540	9606.ENSP00000308450	0	0	0	0	0.84	0	0	0.304	0.884
CDC20	KIF23	1849070	1844781	9606.ENSP00000308450	9606.ENSP00000260363	0	0	0	0	0.807	0.11	0	0.381	0.884
RACGAP1	PBK	1849236	1848348	9606.ENSP00000309871	9606.ENSP00000301905	0	0	0	0	0.868	0	0	0.158	0.884
PFKP	ENO2	1857335	1843192	9606.ENSP00000370517	9606.ENSP00000229277	0.165	0	0	0	0.708	0	0	0.566	0.884
CEP55	OIP5	1855493	1842788	9606.ENSP00000360540	9606.ENSP00000220514	0	0	0	0	0.859	0	0	0.2	0.883
CDKN3	BUB1B	1851839	1847075	9606.ENSP00000335357	9606.ENSP00000287598	0	0	0	0	0.845	0	0	0.272	0.883
PBK	KIAA0101	1848348	1848123	9606.ENSP00000301905	9606.ENSP00000300035	0	0	0	0	0.878	0	0	0.079	0.883
GINS2	NCAPG	1844233	1844063	9606.ENSP00000253462	9606.ENSP00000251496	0	0	0	0	0.863	0	0	0.182	0.883
TOP2A	CDCA8	1860923	1849847	9606.ENSP00000411532	9606.ENSP00000316121	0	0	0	0	0.853	0	0	0.24	0.883
CCNA2	NDC80	1846354	1844946	9606.ENSP00000274026	9606.ENSP00000261597	0	0	0	0	0.865	0	0	0.169	0.883
CCNA2	ANLN	1846354	1845802	9606.ENSP00000274026	9606.ENSP00000265748	0	0	0	0	0.859	0	0	0.205	0.883
TOP2A	CEP55	1860923	1855493	9606.ENSP00000411532	9606.ENSP00000360540	0	0	0	0	0.852	0	0	0.241	0.883
PTTG1	NCAPG	1852874	1844063	9606.ENSP00000344936	9606.ENSP00000251496	0	0	0	0	0.86	0	0	0.198	0.882
KIF20A	ASPM	1858244	1854584	9606.ENSP00000378356	9606.ENSP00000356379	0	0	0	0	0.866	0	0	0.157	0.882
PTTG1	PBK	1852874	1848348	9606.ENSP00000344936	9606.ENSP00000301905	0	0	0	0	0.869	0	0	0.133	0.882
MELK	BUB1B	1847923	1847075	9606.ENSP00000298048	9606.ENSP00000287598	0	0	0	0	0.844	0.043	0	0.273	0.882
CDT1	GINS2	1848231	1844233	9606.ENSP00000301019	9606.ENSP00000253462	0	0	0	0	0.858	0	0	0.204	0.882
GINS1	POLE2	1845151	1842589	9606.ENSP00000262460	9606.ENSP00000216367	0	0	0	0	0.415	0.706	0	0.373	0.882
KIF2C	UBE2C	1855643	1853360	9606.ENSP00000361298	9606.ENSP00000348838	0	0	0	0	0.837	0	0	0.304	0.882
RRM2	KIF11	1854033	1844817	9606.ENSP00000353770	9606.ENSP00000260731	0	0	0	0	0.862	0	0	0.179	0.882
HJURP	MELK	1861060	1847923	9606.ENSP00000414109	9606.ENSP00000298048	0	0	0	0	0.843	0	0	0.277	0.881
MELK	OIP5	1847923	1842788	9606.ENSP00000298048	9606.ENSP00000220514	0	0	0	0	0.871	0	0	0.117	0.881
MCM2	CCNB1	1845676	1844435	9606.ENSP00000265056	9606.ENSP00000256442	0	0	0	0	0.702	0.182	0	0.553	0.881
CEP55	CCNB2	1855493	1847117	9606.ENSP00000360540	9606.ENSP00000288207	0	0	0	0	0.836	0	0	0.304	0.881
CCNF	CDC6	1858453	1842453	9606.ENSP00000380256	9606.ENSP00000209728	0	0	0	0	0.272	0.611	0	0.615	0.881
RRM2	CDC6	1854033	1842453	9606.ENSP00000353770	9606.ENSP00000209728	0	0	0	0	0.716	0.042	0.274	0.468	0.881
HMMR	NCAPG	1858139	1844063	9606.ENSP00000377492	9606.ENSP00000251496	0	0	0	0	0.87	0	0	0.124	0.881
BUB1B	NCAPH	1847075	1843566	9606.ENSP00000287598	9606.ENSP00000240423	0	0	0	0	0.855	0	0	0.211	0.881
ASPM	MELK	1854584	1847923	9606.ENSP00000356379	9606.ENSP00000298048	0	0	0	0	0.876	0	0	0.074	0.88
KIF4A	DLGAP5	1856112	1843859	9606.ENSP00000363524	9606.ENSP00000247191	0	0	0	0	0.834	0.054	0	0.296	0.88
MELK	NDC80	1847923	1844946	9606.ENSP00000298048	9606.ENSP00000261597	0	0	0	0	0.862	0	0	0.162	0.88
RRM2	BUB1	1854033	1848415	9606.ENSP00000353770	9606.ENSP00000302530	0	0	0	0	0.846	0	0	0.249	0.879
KIF2C	ASPM	1855643	1854584	9606.ENSP00000361298	9606.ENSP00000356379	0	0	0	0	0.864	0	0	0.142	0.879
NCAPG	OIP5	1844063	1842788	9606.ENSP00000251496	9606.ENSP00000220514	0	0	0	0	0.863	0	0	0.15	0.879
CDKN3	KIF11	1851839	1844817	9606.ENSP00000335357	9606.ENSP00000260731	0	0	0	0	0.841	0.08	0	0.239	0.879
ASPM	KIAA0101	1854584	1848123	9606.ENSP00000356379	9606.ENSP00000300035	0	0	0	0	0.877	0	0	0.053	0.879
CDC45	MELK	1860553	1847923	9606.ENSP00000405726	9606.ENSP00000298048	0	0	0	0	0.868	0	0	0.121	0.879
RNASEH2A	MCM5	1842842	1842548	9606.ENSP00000221486	9606.ENSP00000216122	0	0	0	0	0.866	0	0	0.136	0.879
CEP55	CDKN3	1855493	1851839	9606.ENSP00000360540	9606.ENSP00000335357	0	0	0	0	0.869	0	0	0.114	0.879
CEP55	CDCA8	1855493	1849847	9606.ENSP00000360540	9606.ENSP00000316121	0	0	0	0	0.847	0	0	0.245	0.879
AURKB	KIFC1	1863844	1859761	9606.ENSP00000463999	9606.ENSP00000393963	0	0	0	0	0.704	0.116	0	0.574	0.879
ASPM	DTL	1854584	1854490	9606.ENSP00000356379	9606.ENSP00000355958	0	0	0	0	0.879	0	0	0	0.879
CDC45	RAD51	1860553	1857551	9606.ENSP00000405726	9606.ENSP00000372088	0	0	0	0	0.788	0.049	0	0.447	0.879
KIF4A	CENPA	1856112	1851939	9606.ENSP00000363524	9606.ENSP00000336868	0	0	0	0	0.813	0.096	0	0.343	0.879
UBE2C	NCAPG	1853360	1844063	9606.ENSP00000348838	9606.ENSP00000251496	0	0	0	0	0.857	0	0	0.188	0.879
SPAG5	DLGAP5	1850533	1843859	9606.ENSP00000323300	9606.ENSP00000247191	0	0	0	0	0.833	0	0	0.304	0.879
CDK1	MCM6	1858283	1845487	9606.ENSP00000378699	9606.ENSP00000264156	0	0	0	0	0.761	0.139	0	0.46	0.879
NEK2	DLGAP5	1854493	1843859	9606.ENSP00000355966	9606.ENSP00000247191	0	0	0	0	0.852	0	0	0.212	0.878
TOP2A	KIF4A	1860923	1856112	9606.ENSP00000411532	9606.ENSP00000363524	0	0	0	0	0.842	0	0	0.257	0.878
CEP55	AURKA	1855493	1842628	9606.ENSP00000360540	9606.ENSP00000216911	0	0	0	0	0.842	0	0	0.264	0.878
TPX2	KIAA0101	1848175	1848123	9606.ENSP00000300403	9606.ENSP00000300035	0	0	0	0	0.864	0	0	0.141	0.878
AURKB	CEP55	1863844	1855493	9606.ENSP00000463999	9606.ENSP00000360540	0	0	0	0	0.817	0	0	0.364	0.878
NT5M	TK1	1857785	1848315	9606.ENSP00000373674	9606.ENSP00000301634	0	0	0	0	0.047	0	0.8	0.414	0.878
CDKN3	TPX2	1851839	1848175	9606.ENSP00000335357	9606.ENSP00000300403	0	0	0	0	0.861	0	0	0.158	0.878
CDC45	CDCA8	1860553	1849847	9606.ENSP00000405726	9606.ENSP00000316121	0	0	0	0	0.85	0	0	0.215	0.877
ASPM	OIP5	1854584	1842788	9606.ENSP00000356379	9606.ENSP00000220514	0	0	0	0	0.861	0	0	0.153	0.877
KIF2C	TTK	1855643	1855108	9606.ENSP00000361298	9606.ENSP00000358813	0	0	0	0	0.835	0.067	0	0.266	0.877
TOP2A	HMMR	1860923	1858139	9606.ENSP00000411532	9606.ENSP00000377492	0	0	0	0	0.841	0	0	0.259	0.877
KIF4A	CCNA2	1856112	1846354	9606.ENSP00000363524	9606.ENSP00000274026	0	0	0	0	0.827	0.123	0	0.258	0.877
CEP55	NDC80	1855493	1844946	9606.ENSP00000360540	9606.ENSP00000261597	0	0	0	0	0.871	0	0	0.088	0.877
CDCA8	PBK	1849847	1848348	9606.ENSP00000316121	9606.ENSP00000301905	0	0	0	0	0.857	0	0	0.169	0.876
RACGAP1	AURKA	1849236	1842628	9606.ENSP00000309871	9606.ENSP00000216911	0	0	0	0	0.819	0	0	0.34	0.876
KIAA0101	KIF11	1848123	1844817	9606.ENSP00000300035	9606.ENSP00000260731	0	0	0	0	0.868	0	0	0.1	0.876
CCNB1	TRIP13	1844435	1842297	9606.ENSP00000256442	9606.ENSP00000166345	0	0	0	0	0.83	0.192	0	0.169	0.876
TOP2A	CKS2	1860923	1856383	9606.ENSP00000411532	9606.ENSP00000364976	0	0	0	0	0.818	0	0	0.347	0.876
CHEK1	CEP55	1859362	1855493	9606.ENSP00000388648	9606.ENSP00000360540	0	0	0	0	0.864	0	0	0.127	0.876
CEP55	PTTG1	1855493	1852874	9606.ENSP00000360540	9606.ENSP00000344936	0	0	0	0	0.844	0	0	0.239	0.876
HJURP	BUB1	1861060	1848415	9606.ENSP00000414109	9606.ENSP00000302530	0	0	0	0	0.858	0	0	0.165	0.876
PRC1	BUB1	1858173	1848415	9606.ENSP00000377793	9606.ENSP00000302530	0	0	0	0	0.802	0.168	0	0.307	0.876
CDCA8	OIP5	1849847	1842788	9606.ENSP00000316121	9606.ENSP00000220514	0	0	0	0	0.866	0	0	0.111	0.876
CKS2	CDC6	1856383	1842453	9606.ENSP00000364976	9606.ENSP00000209728	0	0	0	0	0.43	0.672	0	0.39	0.876
TTK	CENPA	1855108	1851939	9606.ENSP00000358813	9606.ENSP00000336868	0	0	0	0	0.84	0.116	0	0.189	0.875
CKS2	PTTG1	1856383	1852874	9606.ENSP00000364976	9606.ENSP00000344936	0	0	0	0	0.842	0	0	0.242	0.875
MLF1IP	NCAPG	1846726	1844063	9606.ENSP00000281453	9606.ENSP00000251496	0	0	0	0	0.864	0	0	0.122	0.875
MELK	AURKA	1847923	1842628	9606.ENSP00000298048	9606.ENSP00000216911	0	0	0	0.761	0.866	0	0	0.307	0.875
CHEK1	FEN1	1859362	1848737	9606.ENSP00000388648	9606.ENSP00000305480	0	0	0	0	0.764	0.118	0	0.45	0.875
DTL	DLGAP5	1854490	1843859	9606.ENSP00000355958	9606.ENSP00000247191	0	0	0	0	0.864	0	0	0.123	0.875
UBE2C	CDKN3	1853360	1851839	9606.ENSP00000348838	9606.ENSP00000335357	0	0	0	0	0.852	0	0	0.188	0.875
MELK	TRIP13	1847923	1842297	9606.ENSP00000298048	9606.ENSP00000166345	0.062	0	0	0	0.824	0.106	0	0.251	0.875
TPX2	NCAPG	1848175	1844063	9606.ENSP00000300403	9606.ENSP00000251496	0	0	0	0	0.852	0	0	0.186	0.875
TTK	NEK2	1855108	1854493	9606.ENSP00000358813	9606.ENSP00000355966	0	0	0	0.647	0.822	0.274	0	0.251	0.875
BUB1	OIP5	1848415	1842788	9606.ENSP00000302530	9606.ENSP00000220514	0	0	0	0	0.866	0	0	0.105	0.875
HMMR	PTTG1	1858139	1852874	9606.ENSP00000377492	9606.ENSP00000344936	0	0	0	0	0.864	0	0	0.124	0.875
PTTG1	CENPA	1852874	1851939	9606.ENSP00000344936	9606.ENSP00000336868	0	0	0	0	0.812	0	0	0.365	0.875
HMMR	MAD2L1	1858139	1847745	9606.ENSP00000377492	9606.ENSP00000296509	0	0	0	0	0.856	0	0	0.166	0.875
RRM2	KIAA0101	1854033	1848123	9606.ENSP00000353770	9606.ENSP00000300035	0	0	0	0	0.866	0	0	0.1	0.874
CDC45	FEN1	1860553	1848737	9606.ENSP00000405726	9606.ENSP00000305480	0	0	0	0	0.798	0	0	0.404	0.874
CEP55	CCNB1	1855493	1844435	9606.ENSP00000360540	9606.ENSP00000256442	0	0	0	0	0.846	0	0	0.213	0.874
RACGAP1	CCNA2	1849236	1846354	9606.ENSP00000309871	9606.ENSP00000274026	0	0	0	0	0.849	0	0	0.195	0.874
CKS1B	CDC6	1849378	1842453	9606.ENSP00000311083	9606.ENSP00000209728	0	0	0	0	0.351	0.672	0	0.455	0.874
TMEM189	UBE2T	1862712	1854557	9606.ENSP00000450635	9606.ENSP00000356243	0	0	0	0	0.073	0.667	0	0.625	0.874
PTTG1	MELK	1852874	1847923	9606.ENSP00000344936	9606.ENSP00000298048	0	0	0	0	0.854	0	0	0.173	0.874
TTK	MELK	1855108	1847923	9606.ENSP00000358813	9606.ENSP00000298048	0	0	0	0.625	0.863	0.044	0	0.25	0.874
KIAA0101	CCNA2	1848123	1846354	9606.ENSP00000300035	9606.ENSP00000274026	0	0	0	0	0.869	0	0	0.079	0.874
KIF23	NCAPG	1844781	1844063	9606.ENSP00000260363	9606.ENSP00000251496	0	0	0	0	0.854	0.066	0	0.152	0.874
ASPM	NUF2	1854584	1846198	9606.ENSP00000356379	9606.ENSP00000271452	0	0	0	0	0.874	0	0	0	0.874
TOP2A	MCM3	1860923	1843226	9606.ENSP00000411532	9606.ENSP00000229854	0	0	0	0	0.794	0.061	0	0.404	0.874
CDK1	RAD51	1858283	1857551	9606.ENSP00000378699	9606.ENSP00000372088	0	0	0	0	0.669	0.119	0	0.601	0.874
TTK	ANLN	1855108	1845802	9606.ENSP00000358813	9606.ENSP00000265748	0	0	0	0	0.858	0	0	0.151	0.874
PRC1	PBK	1858173	1848348	9606.ENSP00000377793	9606.ENSP00000301905	0	0	0	0	0.841	0.114	0	0.173	0.873
CDC20	MCM2	1849070	1845676	9606.ENSP00000308450	9606.ENSP00000265056	0	0	0	0	0.776	0.043	0	0.455	0.873
VIM	SNAI2	1842995	1842190	9606.ENSP00000224237	9606.ENSP00000020945	0	0	0	0	0.053	0	0	0.872	0.873
FGFR1	ANGPT2	1859710	1849738	9606.ENSP00000393312	9606.ENSP00000314897	0	0	0	0	0	0.145	0.8	0.317	0.873
MELK	MLF1IP	1847923	1846726	9606.ENSP00000298048	9606.ENSP00000281453	0	0	0	0	0.859	0	0	0.139	0.873
CEP55	ASPM	1855493	1854584	9606.ENSP00000360540	9606.ENSP00000356379	0	0	0	0	0.872	0	0	0.045	0.873
TTK	CKS1B	1855108	1849378	9606.ENSP00000358813	9606.ENSP00000311083	0	0	0	0	0.575	0.672	0	0.165	0.873
TYMS	BUB1	1849803	1848415	9606.ENSP00000315644	9606.ENSP00000302530	0	0	0	0	0.841	0	0	0.238	0.873
ZWINT	KIAA0101	1856020	1848123	9606.ENSP00000363055	9606.ENSP00000300035	0	0	0	0	0.859	0	0	0.138	0.873
RACGAP1	MELK	1849236	1847923	9606.ENSP00000309871	9606.ENSP00000298048	0	0	0	0	0.827	0	0	0.291	0.872
CDK1	TRIP13	1858283	1842297	9606.ENSP00000378699	9606.ENSP00000166345	0	0	0	0	0.841	0.116	0	0.161	0.872
ANLN	CCNB1	1845802	1844435	9606.ENSP00000265748	9606.ENSP00000256442	0	0	0	0	0.83	0	0	0.275	0.872
RRM2	EXO1	1854033	1849472	9606.ENSP00000353770	9606.ENSP00000311873	0	0	0	0	0.842	0	0	0.225	0.872
CEP55	KIAA0101	1855493	1848123	9606.ENSP00000360540	9606.ENSP00000300035	0	0	0	0	0.867	0	0	0.074	0.872
CEP55	CENPA	1855493	1851939	9606.ENSP00000360540	9606.ENSP00000336868	0	0	0	0	0.829	0	0	0.277	0.871
ASPM	UBE2C	1854584	1853360	9606.ENSP00000356379	9606.ENSP00000348838	0	0	0	0	0.865	0	0	0.087	0.871
RRM2	PTTG1	1854033	1852874	9606.ENSP00000353770	9606.ENSP00000344936	0	0	0	0	0.83	0	0	0.275	0.871
CDC45	KIF2C	1860553	1855643	9606.ENSP00000405726	9606.ENSP00000361298	0	0	0	0	0.843	0.044	0	0.207	0.871
EXO1	NCAPG	1849472	1844063	9606.ENSP00000311873	9606.ENSP00000251496	0	0	0	0	0.867	0	0	0.072	0.871
KIF20A	UBE2C	1858244	1853360	9606.ENSP00000378356	9606.ENSP00000348838	0	0	0	0	0.843	0	0	0.215	0.871
PRC1	CEP55	1858173	1855493	9606.ENSP00000377793	9606.ENSP00000360540	0	0	0	0	0.828	0	0	0.28	0.871
KIFC1	AURKA	1859761	1842628	9606.ENSP00000393963	9606.ENSP00000216911	0	0	0	0	0.672	0.116	0	0.592	0.871
TOP2A	SPAG5	1860923	1850533	9606.ENSP00000411532	9606.ENSP00000323300	0	0	0	0	0.853	0	0	0.152	0.87
CDC45	TTK	1860553	1855108	9606.ENSP00000405726	9606.ENSP00000358813	0	0	0	0	0.856	0	0	0.139	0.87
CHEK1	MELK	1859362	1847923	9606.ENSP00000388648	9606.ENSP00000298048	0	0	0	0.73	0.845	0.172	0	0.133	0.87
CDKN3	OIP5	1851839	1842788	9606.ENSP00000335357	9606.ENSP00000220514	0	0	0	0	0.87	0	0	0	0.87
ESPL1	NCAPG	1844556	1844063	9606.ENSP00000257934	9606.ENSP00000251496	0	0	0	0	0.79	0.065	0	0.391	0.87
CCNB1	OIP5	1844435	1842788	9606.ENSP00000256442	9606.ENSP00000220514	0	0	0	0	0.87	0	0	0.041	0.87
KIF2C	PTTG1	1855643	1852874	9606.ENSP00000361298	9606.ENSP00000344936	0	0	0	0	0.805	0	0	0.364	0.87
CDC45	CCNB1	1860553	1844435	9606.ENSP00000405726	9606.ENSP00000256442	0	0	0	0	0.738	0.066	0	0.514	0.87
PRC1	KIAA0101	1858173	1848123	9606.ENSP00000377793	9606.ENSP00000300035	0	0	0	0	0.859	0	0	0.111	0.869
SYT12	THRSP	1858143	1846698	9606.ENSP00000377520	9606.ENSP00000281030	0	0	0	0	0	0	0	0.869	0.869
TTK	KIF23	1855108	1844781	9606.ENSP00000358813	9606.ENSP00000260363	0	0	0	0	0.834	0.067	0	0.224	0.869
MAD2L1	OIP5	1847745	1842788	9606.ENSP00000296509	9606.ENSP00000220514	0	0	0	0	0.864	0	0	0.077	0.869
TYMS	CCNB2	1849803	1847117	9606.ENSP00000315644	9606.ENSP00000288207	0	0	0	0	0.841	0	0	0.211	0.869
HMMR	MELK	1858139	1847923	9606.ENSP00000377492	9606.ENSP00000298048	0	0	0	0	0.852	0	0	0.151	0.869
AURKB	MELK	1863844	1847923	9606.ENSP00000463999	9606.ENSP00000298048	0	0	0	0.75	0.858	0	0	0.327	0.869
MAD2L1	ANLN	1847745	1845802	9606.ENSP00000296509	9606.ENSP00000265748	0	0	0	0	0.841	0	0	0.21	0.869
ASPM	CCNB2	1854584	1847117	9606.ENSP00000356379	9606.ENSP00000288207	0	0	0	0	0.863	0	0	0.084	0.869
RRM2	UBE2C	1854033	1853360	9606.ENSP00000353770	9606.ENSP00000348838	0	0	0	0	0.82	0	0	0.305	0.869
MCM2	CDK4	1845676	1844551	9606.ENSP00000265056	9606.ENSP00000257904	0	0	0	0	0.303	0.636	0	0.524	0.869
CENPA	CDKN3	1851939	1851839	9606.ENSP00000336868	9606.ENSP00000335357	0	0	0	0	0.843	0.054	0	0.185	0.868
SMC4	REC8	1852454	1849097	9606.ENSP00000341382	9606.ENSP00000308699	0	0	0	0	0.252	0.679	0	0.497	0.868
HJURP	CDCA8	1861060	1849847	9606.ENSP00000414109	9606.ENSP00000316121	0	0	0	0	0.825	0	0	0.277	0.868
PTTG1	KIF11	1852874	1844817	9606.ENSP00000344936	9606.ENSP00000260731	0	0	0	0	0.787	0	0	0.407	0.868
KIF20A	CDKN3	1858244	1851839	9606.ENSP00000378356	9606.ENSP00000335357	0	0	0	0	0.842	0.061	0	0.18	0.868
HMMR	TTK	1858139	1855108	9606.ENSP00000377492	9606.ENSP00000358813	0	0	0	0	0.853	0	0	0.14	0.868
FANCI	NCAPG	1849356	1844063	9606.ENSP00000310842	9606.ENSP00000251496	0	0	0	0	0.857	0	0	0.115	0.868
HMMR	ASPM	1858139	1854584	9606.ENSP00000377492	9606.ENSP00000356379	0	0	0	0	0.866	0	0	0.054	0.868
PRC1	CENPA	1858173	1851939	9606.ENSP00000377793	9606.ENSP00000336868	0	0	0	0	0.813	0.065	0	0.307	0.868
CCNF	CDK4	1858453	1844551	9606.ENSP00000380256	9606.ENSP00000257904	0	0	0	0	0.272	0.548	0	0.632	0.868
KIF4A	CDCA8	1856112	1849847	9606.ENSP00000363524	9606.ENSP00000316121	0	0	0	0	0.797	0	0	0.378	0.868
MAD2L1	RAD51AP1	1847745	1843165	9606.ENSP00000296509	9606.ENSP00000228843	0	0	0	0	0.848	0	0	0.164	0.867
CDKN3	NDC80	1851839	1844946	9606.ENSP00000335357	9606.ENSP00000261597	0	0	0	0	0.84	0	0	0.204	0.867
H2AFY2	HIST1H3H	1855864	1854968	9606.ENSP00000362352	9606.ENSP00000358160	0	0	0	0	0.551	0.394	0	0.551	0.867
CENPA	PBK	1851939	1848348	9606.ENSP00000336868	9606.ENSP00000301905	0	0	0	0	0.846	0.065	0	0.149	0.867
KIF2C	SPAG5	1855643	1850533	9606.ENSP00000361298	9606.ENSP00000323300	0	0	0	0	0.807	0	0	0.338	0.867
CDT1	CCNB1	1848231	1844435	9606.ENSP00000301019	9606.ENSP00000256442	0	0	0	0	0.659	0.357	0	0.444	0.867
EXO1	CDC6	1849472	1842453	9606.ENSP00000311873	9606.ENSP00000209728	0	0	0	0	0.795	0	0	0.38	0.867
CDC45	OIP5	1860553	1842788	9606.ENSP00000405726	9606.ENSP00000220514	0	0	0	0	0.867	0	0	0	0.867
KIF2C	NEK2	1855643	1854493	9606.ENSP00000361298	9606.ENSP00000355966	0	0	0	0	0.796	0.046	0	0.374	0.867
NEK2	CCNB2	1854493	1847117	9606.ENSP00000355966	9606.ENSP00000288207	0	0	0	0	0.791	0.07	0	0.372	0.867
PRC1	CKS2	1858173	1856383	9606.ENSP00000377793	9606.ENSP00000364976	0	0	0	0	0.835	0	0	0.227	0.867
PCNA	CDKN3	1856984	1851839	9606.ENSP00000368438	9606.ENSP00000335357	0	0	0	0	0.626	0	0	0.659	0.867
ASPM	PTTG1	1854584	1852874	9606.ENSP00000356379	9606.ENSP00000344936	0	0	0	0	0.854	0	0	0.116	0.866
HJURP	KIF20A	1861060	1858244	9606.ENSP00000414109	9606.ENSP00000378356	0	0	0	0	0.858	0	0	0.097	0.866
PRIM1	RNASEH2A	1853600	1842842	9606.ENSP00000350491	9606.ENSP00000221486	0	0	0	0	0.83	0	0	0.245	0.866
AURKB	TACC3	1863844	1850844	9606.ENSP00000463999	9606.ENSP00000326550	0	0	0	0	0.637	0	0	0.648	0.866
PBK	BUB1B	1848348	1847075	9606.ENSP00000301905	9606.ENSP00000287598	0	0	0	0	0.845	0.043	0	0.17	0.866
KIF20A	HMMR	1858244	1858139	9606.ENSP00000378356	9606.ENSP00000377492	0	0	0	0	0.848	0	0	0.151	0.866
KIF20A	RRM2	1858244	1854033	9606.ENSP00000378356	9606.ENSP00000353770	0	0	0	0	0.839	0	0	0.2	0.866
PTTG1	KIAA0101	1852874	1848123	9606.ENSP00000344936	9606.ENSP00000300035	0	0	0	0	0.856	0	0	0.109	0.866
RRM2	BUB1B	1854033	1847075	9606.ENSP00000353770	9606.ENSP00000287598	0	0	0	0	0.827	0	0	0.254	0.866
CDC45	CDC25A	1860553	1848560	9606.ENSP00000405726	9606.ENSP00000303706	0	0	0	0	0.59	0	0	0.687	0.866
HMMR	CCNA2	1858139	1846354	9606.ENSP00000377492	9606.ENSP00000274026	0	0	0	0	0.829	0	0	0.247	0.866
KIF4A	CEP55	1856112	1855493	9606.ENSP00000363524	9606.ENSP00000360540	0	0	0	0	0.809	0.071	0	0.305	0.866
HMMR	CCNB2	1858139	1847117	9606.ENSP00000377492	9606.ENSP00000288207	0	0	0	0	0.823	0	0	0.277	0.866
TOP2A	EPRS	1860923	1854472	9606.ENSP00000411532	9606.ENSP00000355890	0.099	0	0	0	0.506	0	0	0.721	0.865
CDK1	OIP5	1858283	1842788	9606.ENSP00000378699	9606.ENSP00000220514	0	0	0	0	0.861	0	0	0.066	0.865
HMMR	UBE2C	1858139	1853360	9606.ENSP00000377492	9606.ENSP00000348838	0	0	0	0	0.831	0	0	0.234	0.865
CENPA	DLGAP5	1851939	1843859	9606.ENSP00000336868	9606.ENSP00000247191	0	0	0	0	0.819	0	0	0.286	0.865
KIAA0101	NCAPG	1848123	1844063	9606.ENSP00000300035	9606.ENSP00000251496	0	0	0	0	0.863	0	0	0.052	0.865
FANCI	OIP5	1849356	1842788	9606.ENSP00000310842	9606.ENSP00000220514	0	0	0	0	0.854	0	0	0.111	0.865
CHEK1	TYMS	1859362	1849803	9606.ENSP00000388648	9606.ENSP00000315644	0	0	0	0	0.802	0	0	0.345	0.865
UBE2C	MELK	1853360	1847923	9606.ENSP00000348838	9606.ENSP00000298048	0	0	0	0	0.826	0	0	0.256	0.865
TTK	TPX2	1855108	1848175	9606.ENSP00000358813	9606.ENSP00000300403	0	0	0	0	0.835	0	0	0.215	0.865
TOP2A	RAD51	1860923	1857551	9606.ENSP00000411532	9606.ENSP00000372088	0.061	0	0	0	0.521	0.084	0	0.712	0.865
TTK	OIP5	1855108	1842788	9606.ENSP00000358813	9606.ENSP00000220514	0	0	0	0	0.852	0	0	0.126	0.865
CCNB1	ECT2	1844435	1843313	9606.ENSP00000256442	9606.ENSP00000232458	0	0	0	0	0.751	0.17	0	0.395	0.864
KIF20A	NEK2	1858244	1854493	9606.ENSP00000378356	9606.ENSP00000355966	0	0	0	0	0.825	0.046	0	0.251	0.864
DTL	PBK	1854490	1848348	9606.ENSP00000355958	9606.ENSP00000301905	0	0	0	0	0.85	0	0	0.134	0.864
UBE2C	PBK	1853360	1848348	9606.ENSP00000348838	9606.ENSP00000301905	0	0	0	0	0.845	0	0	0.16	0.864
CKS2	CDC20	1856383	1849070	9606.ENSP00000364976	9606.ENSP00000308450	0	0	0	0	0.7	0	0	0.566	0.864
CDCA8	FAM64A	1849847	1843987	9606.ENSP00000316121	9606.ENSP00000250056	0	0	0	0	0.864	0	0	0	0.864
TYMS	KIAA0101	1849803	1848123	9606.ENSP00000315644	9606.ENSP00000300035	0	0	0	0	0.853	0	0	0.111	0.864
CDK1	RAD51AP1	1858283	1843165	9606.ENSP00000378699	9606.ENSP00000228843	0	0	0	0	0.858	0	0	0.074	0.863
CDCA8	NCAPG	1849847	1844063	9606.ENSP00000316121	9606.ENSP00000251496	0	0	0	0	0.854	0	0	0.1	0.863
FOXM1	CDKN3	1852579	1851839	9606.ENSP00000342307	9606.ENSP00000335357	0	0	0	0	0.783	0.14	0	0.323	0.863
HJURP	DLGAP5	1861060	1843859	9606.ENSP00000414109	9606.ENSP00000247191	0	0	0	0	0.83	0	0	0.232	0.863
HMMR	CCNB1	1858139	1844435	9606.ENSP00000377492	9606.ENSP00000256442	0	0	0	0	0.817	0	0	0.28	0.863
HMMR	CENPA	1858139	1851939	9606.ENSP00000377492	9606.ENSP00000336868	0	0	0	0	0.833	0	0	0.212	0.863
CCNA2	OIP5	1846354	1842788	9606.ENSP00000274026	9606.ENSP00000220514	0	0	0	0	0.86	0	0	0.064	0.863
CCNB2	OIP5	1847117	1842788	9606.ENSP00000288207	9606.ENSP00000220514	0	0	0	0	0.854	0	0	0.097	0.863
HIST1H3H	HIST1H4J	1854968	1853135	9606.ENSP00000358160	9606.ENSP00000347168	0	0	0	0	0.202	0.506	0	0.678	0.862
CDC45	PBK	1860553	1848348	9606.ENSP00000405726	9606.ENSP00000301905	0	0	0	0	0.86	0	0	0.059	0.862
ASPM	FANCI	1854584	1849356	9606.ENSP00000356379	9606.ENSP00000310842	0	0	0	0	0.861	0	0	0	0.861
PRC1	FANCI	1858173	1849356	9606.ENSP00000377793	9606.ENSP00000310842	0	0	0	0	0.827	0	0	0.227	0.861
HMMR	NDC80	1858139	1844946	9606.ENSP00000377492	9606.ENSP00000261597	0	0	0	0	0.856	0	0	0.079	0.861
KIF2C	TROAP	1855643	1844553	9606.ENSP00000361298	9606.ENSP00000257909	0	0	0	0	0.843	0	0	0.148	0.861
NUF2	AURKA	1846198	1842628	9606.ENSP00000271452	9606.ENSP00000216911	0	0	0	0	0.686	0.329	0	0.395	0.861
TOP2A	PLK1	1860923	1848135	9606.ENSP00000411532	9606.ENSP00000300093	0	0	0	0	0.679	0.285	0	0.443	0.861
KIF2C	FOXM1	1855643	1852579	9606.ENSP00000361298	9606.ENSP00000342307	0	0	0	0	0.831	0.05	0	0.203	0.861
MAD2L1	ECT2	1847745	1843313	9606.ENSP00000296509	9606.ENSP00000232458	0	0	0	0	0.836	0	0	0.188	0.861
HMMR	KIF11	1858139	1844817	9606.ENSP00000377492	9606.ENSP00000260731	0	0	0	0	0.836	0	0	0.188	0.861
TYMS	NDC80	1849803	1844946	9606.ENSP00000315644	9606.ENSP00000261597	0	0	0	0	0.854	0	0	0.09	0.861
TTK	PTTG1	1855108	1852874	9606.ENSP00000358813	9606.ENSP00000344936	0	0	0	0	0.822	0	0	0.252	0.861
TOP2A	MCM6	1860923	1845487	9606.ENSP00000411532	9606.ENSP00000264156	0	0	0	0	0.738	0.061	0	0.478	0.861
NEK2	CCNA2	1854493	1846354	9606.ENSP00000355966	9606.ENSP00000274026	0	0	0	0	0.792	0.067	0	0.344	0.861
HJURP	CEP55	1861060	1855493	9606.ENSP00000414109	9606.ENSP00000360540	0	0	0	0	0.82	0	0	0.256	0.86
TYMS	CCNA2	1849803	1846354	9606.ENSP00000315644	9606.ENSP00000274026	0	0	0	0	0.816	0	0	0.273	0.86
CEP55	DTL	1855493	1854490	9606.ENSP00000360540	9606.ENSP00000355958	0	0	0	0	0.838	0	0	0.173	0.86
BUB1B	TRIP13	1847075	1842297	9606.ENSP00000287598	9606.ENSP00000166345	0	0	0	0	0.77	0.336	0	0.159	0.86
PTTG1	TYMS	1852874	1849803	9606.ENSP00000344936	9606.ENSP00000315644	0	0	0	0	0.843	0	0	0.149	0.86
ASPM	CDCA8	1854584	1849847	9606.ENSP00000356379	9606.ENSP00000316121	0	0	0	0	0.86	0	0	0	0.86
PGF	FGFR1	1862737	1859710	9606.ENSP00000451040	9606.ENSP00000393312	0	0	0	0	0	0.048	0.8	0.326	0.86
PLK4	NCAPG	1846179	1844063	9606.ENSP00000270861	9606.ENSP00000251496	0	0	0	0	0.857	0	0	0.056	0.86
BUB1B	OIP5	1847075	1842788	9606.ENSP00000287598	9606.ENSP00000220514	0	0	0	0	0.846	0	0	0.127	0.86
ANLN	NCAPG	1845802	1844063	9606.ENSP00000265748	9606.ENSP00000251496	0	0	0	0	0.838	0	0	0.169	0.86
CCNA2	GINS2	1846354	1844233	9606.ENSP00000274026	9606.ENSP00000253462	0	0	0	0	0.845	0.054	0	0.117	0.859
EXO1	MELK	1849472	1847923	9606.ENSP00000311873	9606.ENSP00000298048	0	0	0	0	0.833	0.13	0	0.107	0.859
KIF11	OIP5	1844817	1842788	9606.ENSP00000260731	9606.ENSP00000220514	0	0	0	0	0.84	0	0	0.156	0.859
CDKN3	ANLN	1851839	1845802	9606.ENSP00000335357	9606.ENSP00000265748	0	0	0	0	0.851	0	0	0.091	0.859
KIAA0101	OIP5	1848123	1842788	9606.ENSP00000300035	9606.ENSP00000220514	0	0	0	0	0.859	0	0	0	0.859
CKS2	AURKA	1856383	1842628	9606.ENSP00000364976	9606.ENSP00000216911	0	0	0	0	0.809	0	0	0.292	0.859
KIF4A	ASPM	1856112	1854584	9606.ENSP00000363524	9606.ENSP00000356379	0	0	0	0	0.853	0	0	0.08	0.859
KIAA0101	MLF1IP	1848123	1846726	9606.ENSP00000300035	9606.ENSP00000281453	0	0	0	0	0.857	0	0	0.045	0.858
SPAG5	TPX2	1850533	1848175	9606.ENSP00000323300	9606.ENSP00000300403	0	0	0	0	0.812	0	0	0.277	0.858
HMMR	CDKN3	1858139	1851839	9606.ENSP00000377492	9606.ENSP00000335357	0	0	0	0	0.849	0	0	0.102	0.858
NCAPG	TRIP13	1844063	1842297	9606.ENSP00000251496	9606.ENSP00000166345	0	0	0	0	0.842	0	0	0.141	0.858
CDK1	FANCI	1858283	1849356	9606.ENSP00000378699	9606.ENSP00000310842	0	0	0	0	0.836	0	0	0.168	0.858
FOXM1	DLGAP5	1852579	1843859	9606.ENSP00000342307	9606.ENSP00000247191	0	0	0	0	0.837	0	0	0.165	0.858
EXO1	BUB1	1849472	1848415	9606.ENSP00000311873	9606.ENSP00000302530	0	0	0	0	0.841	0.071	0	0.113	0.858
MELK	ECT2	1847923	1843313	9606.ENSP00000298048	9606.ENSP00000232458	0	0	0	0	0.823	0.104	0	0.169	0.857
CHEK1	KIF11	1859362	1844817	9606.ENSP00000388648	9606.ENSP00000260731	0	0	0	0	0.802	0	0	0.311	0.857
MCM2	AURKA	1845676	1842628	9606.ENSP00000265056	9606.ENSP00000216911	0	0	0	0	0.805	0	0	0.295	0.857
CDK1	ESPL1	1858283	1844556	9606.ENSP00000378699	9606.ENSP00000257934	0	0	0	0	0.399	0.172	0	0.736	0.857
TOP3B	RMI2	1853482	1849289	9606.ENSP00000349705	9606.ENSP00000310356	0	0	0	0	0.053	0	0.8	0.308	0.857
PRC1	TYMS	1858173	1849803	9606.ENSP00000377793	9606.ENSP00000315644	0	0	0	0	0.838	0	0	0.149	0.857
RRM2	CDCA8	1854033	1849847	9606.ENSP00000353770	9606.ENSP00000316121	0	0	0	0	0.836	0	0	0.163	0.857
TOP2A	RAD51AP1	1860923	1843165	9606.ENSP00000411532	9606.ENSP00000228843	0	0	0	0	0.836	0	0	0.163	0.857
PRSS3	PRSS1	1854099	1849102	9606.ENSP00000354280	9606.ENSP00000308720	0	0	0.527	0.985	0.303	0	0.8	0.814	0.857
NEK2	CDCA8	1854493	1849847	9606.ENSP00000355966	9606.ENSP00000316121	0	0	0	0	0.81	0	0	0.277	0.857
KIAA0101	MAD2L1	1848123	1847745	9606.ENSP00000300035	9606.ENSP00000296509	0	0	0	0	0.851	0	0	0.076	0.857
KIF4A	MAD2L1	1856112	1847745	9606.ENSP00000363524	9606.ENSP00000296509	0	0	0	0	0.716	0.331	0	0.302	0.856
DTL	KIF11	1854490	1844817	9606.ENSP00000355958	9606.ENSP00000260731	0	0	0	0	0.846	0	0	0.1	0.856
CCNA2	RAD51AP1	1846354	1843165	9606.ENSP00000274026	9606.ENSP00000228843	0	0	0	0	0.834	0	0	0.17	0.856
TTK	DTL	1855108	1854490	9606.ENSP00000358813	9606.ENSP00000355958	0	0	0	0	0.85	0	0	0.079	0.856
NCAPG	CDC6	1844063	1842453	9606.ENSP00000251496	9606.ENSP00000209728	0	0	0	0	0.839	0	0	0.142	0.856
CDK1	MKI67	1858283	1854841	9606.ENSP00000378699	9606.ENSP00000357643	0	0	0	0	0.722	0.36	0	0.255	0.856
RRM2	CENPA	1854033	1851939	9606.ENSP00000353770	9606.ENSP00000336868	0	0	0	0	0.815	0	0	0.255	0.856
AURKB	HJURP	1863844	1861060	9606.ENSP00000463999	9606.ENSP00000414109	0	0	0	0	0.809	0	0	0.277	0.856
OASL	OAS3	1844517	1843172	9606.ENSP00000257570	9606.ENSP00000228928	0	0	0	0.835	0.841	0	0	0.575	0.856
NUF2	MND1	1846198	1843567	9606.ENSP00000271452	9606.ENSP00000240488	0	0	0	0	0.856	0	0	0	0.856
HJURP	NCAPG	1861060	1844063	9606.ENSP00000414109	9606.ENSP00000251496	0	0	0	0	0.829	0	0	0.194	0.856
HMMR	KIAA0101	1858139	1848123	9606.ENSP00000377492	9606.ENSP00000300035	0	0	0	0	0.842	0	0	0.12	0.855
BUB1	TRIP13	1848415	1842297	9606.ENSP00000302530	9606.ENSP00000166345	0	0	0	0	0.843	0	0	0.112	0.855
TACC3	CDC20	1850844	1849070	9606.ENSP00000326550	9606.ENSP00000308450	0	0	0	0	0.825	0	0	0.205	0.855
KIF4A	PBK	1856112	1848348	9606.ENSP00000363524	9606.ENSP00000301905	0	0	0	0	0.827	0.088	0	0.158	0.855
HMGB2	H2AFZ	1847742	1847723	9606.ENSP00000296503	9606.ENSP00000296417	0	0	0	0	0.658	0.513	0	0.201	0.855
MAD2L1	MND1	1847745	1843567	9606.ENSP00000296509	9606.ENSP00000240488	0	0	0	0	0.853	0	0	0.056	0.855
ANLN	NDC80	1845802	1844946	9606.ENSP00000265748	9606.ENSP00000261597	0	0	0	0	0.828	0	0	0.194	0.855
TPX2	NDC80	1848175	1844946	9606.ENSP00000300403	9606.ENSP00000261597	0	0	0	0	0.818	0	0	0.236	0.855
BUB1	MND1	1848415	1843567	9606.ENSP00000302530	9606.ENSP00000240488	0	0	0	0	0.855	0	0	0	0.855
TTK	UBE2C	1855108	1853360	9606.ENSP00000358813	9606.ENSP00000348838	0	0	0	0	0.833	0	0	0.167	0.855
CHEK1	DLGAP5	1859362	1843859	9606.ENSP00000388648	9606.ENSP00000247191	0	0	0	0	0.829	0	0	0.185	0.855
DTL	GINS2	1854490	1844233	9606.ENSP00000355958	9606.ENSP00000253462	0	0	0	0	0.847	0	0	0.094	0.855
PLK4	ESPL1	1846179	1844556	9606.ENSP00000270861	9606.ENSP00000257934	0	0	0	0	0.363	0.55	0	0.534	0.854
KIF2C	OIP5	1855643	1842788	9606.ENSP00000361298	9606.ENSP00000220514	0	0	0	0	0.835	0	0	0.152	0.854
PBK	RAD51AP1	1848348	1843165	9606.ENSP00000301905	9606.ENSP00000228843	0	0	0	0	0.845	0	0	0.096	0.854
DTL	FANCI	1854490	1849356	9606.ENSP00000355958	9606.ENSP00000310842	0	0	0	0	0.832	0	0	0.169	0.854
BUB1	MCM6	1848415	1845487	9606.ENSP00000302530	9606.ENSP00000264156	0	0	0	0	0.793	0.053	0	0.319	0.854
EXO1	FEN1	1849472	1848737	9606.ENSP00000311873	9606.ENSP00000305480	0	0	0	0.674	0.69	0.396	0	0.783	0.854
KIF20A	PLK4	1858244	1846179	9606.ENSP00000378356	9606.ENSP00000270861	0	0	0	0	0.818	0	0	0.233	0.854
CDT1	CCNB2	1848231	1847117	9606.ENSP00000301019	9606.ENSP00000288207	0	0	0	0	0.815	0	0	0.242	0.854
HJURP	TPX2	1861060	1848175	9606.ENSP00000414109	9606.ENSP00000300403	0	0	0	0	0.847	0	0	0.09	0.854
CDC45	DLGAP5	1860553	1843859	9606.ENSP00000405726	9606.ENSP00000247191	0	0	0	0	0.848	0	0	0.074	0.854
DTL	MELK	1854490	1847923	9606.ENSP00000355958	9606.ENSP00000298048	0	0	0	0	0.833	0	0	0.164	0.854
KIAA0101	CCNB1	1848123	1844435	9606.ENSP00000300035	9606.ENSP00000256442	0	0	0	0	0.84	0	0	0.127	0.854
NCAPG	MND1	1844063	1843567	9606.ENSP00000251496	9606.ENSP00000240488	0	0	0	0	0.852	0	0	0.045	0.853
CEP55	TRIP13	1855493	1842297	9606.ENSP00000360540	9606.ENSP00000166345	0	0	0	0	0.812	0	0	0.249	0.853
TPX2	OIP5	1848175	1842788	9606.ENSP00000300403	9606.ENSP00000220514	0	0	0	0	0.849	0	0	0.07	0.853
KIF11	POLE2	1844817	1842589	9606.ENSP00000260731	9606.ENSP00000216367	0	0	0	0	0.845	0	0	0.089	0.853
TPX2	TRIP13	1848175	1842297	9606.ENSP00000300403	9606.ENSP00000166345	0	0	0	0	0.823	0	0	0.205	0.853
KIF4A	NCAPG	1856112	1844063	9606.ENSP00000363524	9606.ENSP00000251496	0	0	0	0	0.787	0.066	0	0.32	0.853
ZWINT	UBE2C	1856020	1853360	9606.ENSP00000363055	9606.ENSP00000348838	0	0	0	0	0.801	0	0	0.292	0.853
PBK	TRIP13	1848348	1842297	9606.ENSP00000301905	9606.ENSP00000166345	0.062	0	0	0	0.816	0.106	0	0.161	0.853
KIF2C	PBK	1855643	1848348	9606.ENSP00000361298	9606.ENSP00000301905	0	0	0	0	0.818	0.088	0	0.184	0.853
CDC45	ASPM	1860553	1854584	9606.ENSP00000405726	9606.ENSP00000356379	0	0	0	0	0.85	0	0	0.054	0.852
CCNB2	ANLN	1847117	1845802	9606.ENSP00000288207	9606.ENSP00000265748	0	0	0	0	0.812	0	0	0.243	0.852
CDKN3	PKMYT1	1851839	1845109	9606.ENSP00000335357	9606.ENSP00000262300	0	0	0	0	0.297	0.667	0	0.419	0.852
ASF1B	MCM3	1845347	1843226	9606.ENSP00000263382	9606.ENSP00000229854	0	0	0	0	0.771	0.263	0	0.193	0.852
HMMR	OIP5	1858139	1842788	9606.ENSP00000377492	9606.ENSP00000220514	0	0	0	0	0.835	0	0	0.143	0.852
CKS2	NCAPG	1856383	1844063	9606.ENSP00000364976	9606.ENSP00000251496	0	0	0	0	0.83	0	0	0.169	0.852
CKS2	UBE2C	1856383	1853360	9606.ENSP00000364976	9606.ENSP00000348838	0	0	0	0	0.776	0	0	0.365	0.852
ASF1B	MCM5	1845347	1842548	9606.ENSP00000263382	9606.ENSP00000216122	0	0	0	0	0.768	0.263	0	0.205	0.852
ASPM	CENPA	1854584	1851939	9606.ENSP00000356379	9606.ENSP00000336868	0	0	0	0	0.849	0	0	0.057	0.852
ATAD2	CCNA2	1847066	1846354	9606.ENSP00000287394	9606.ENSP00000274026	0	0	0	0	0.803	0.192	0	0.145	0.852
SPAG5	CDCA8	1850533	1849847	9606.ENSP00000323300	9606.ENSP00000316121	0	0	0	0	0.825	0	0	0.189	0.852
KIF20A	OIP5	1858244	1842788	9606.ENSP00000378356	9606.ENSP00000220514	0	0	0	0	0.825	0	0	0.185	0.851
KIF2C	CDKN3	1855643	1851839	9606.ENSP00000361298	9606.ENSP00000335357	0	0	0	0	0.823	0.061	0	0.174	0.851
CDC45	ASF1B	1860553	1845347	9606.ENSP00000405726	9606.ENSP00000263382	0	0	0	0	0.785	0.054	0	0.323	0.851
CHEK1	RRM2	1859362	1854033	9606.ENSP00000388648	9606.ENSP00000353770	0	0	0	0	0.783	0	0	0.343	0.851
RACGAP1	BUB1B	1849236	1847075	9606.ENSP00000309871	9606.ENSP00000287598	0	0	0	0	0.803	0	0	0.277	0.851
DTL	KIAA0101	1854490	1848123	9606.ENSP00000355958	9606.ENSP00000300035	0	0	0	0	0.839	0	0	0.114	0.851
PCNA	CDC25C	1856984	1850370	9606.ENSP00000368438	9606.ENSP00000321656	0	0	0	0	0.163	0.36	0	0.744	0.851
CDKN3	FEN1	1851839	1848737	9606.ENSP00000335357	9606.ENSP00000305480	0	0	0	0	0.79	0.093	0	0.282	0.851
RRM2	OIP5	1854033	1842788	9606.ENSP00000353770	9606.ENSP00000220514	0	0	0	0	0.85	0	0	0.048	0.851
NCAPG	POLE2	1844063	1842589	9606.ENSP00000251496	9606.ENSP00000216367	0	0	0	0	0.851	0	0	0	0.851
NUF2	DLGAP5	1846198	1843859	9606.ENSP00000271452	9606.ENSP00000247191	0	0	0	0	0.786	0	0	0.335	0.851
KIF4A	NEK2	1856112	1854493	9606.ENSP00000363524	9606.ENSP00000355966	0	0	0	0	0.798	0.046	0	0.29	0.851
SMC4	BUB1	1852454	1848415	9606.ENSP00000341382	9606.ENSP00000302530	0	0	0	0	0.772	0.14	0	0.294	0.85
UBE2C	FOXM1	1853360	1852579	9606.ENSP00000348838	9606.ENSP00000342307	0	0	0	0	0.82	0	0	0.2	0.85
SMC4	ESPL1	1852454	1844556	9606.ENSP00000341382	9606.ENSP00000257934	0	0	0	0	0.593	0.292	0	0.522	0.85
AURKB	HMMR	1863844	1858139	9606.ENSP00000463999	9606.ENSP00000377492	0	0	0	0	0.803	0	0	0.271	0.85
AURKB	FEN1	1863844	1848737	9606.ENSP00000463999	9606.ENSP00000305480	0	0	0	0	0.814	0	0	0.226	0.85
MELK	RAD51AP1	1847923	1843165	9606.ENSP00000298048	9606.ENSP00000228843	0	0	0	0	0.824	0	0	0.181	0.85
RACGAP1	NDC80	1849236	1844946	9606.ENSP00000309871	9606.ENSP00000261597	0	0	0	0	0.836	0	0	0.127	0.85
HJURP	CCNB2	1861060	1847117	9606.ENSP00000414109	9606.ENSP00000288207	0	0	0	0	0.832	0	0	0.141	0.849
PRC1	PLK4	1858173	1846179	9606.ENSP00000377793	9606.ENSP00000270861	0	0	0	0	0.807	0	0	0.246	0.849
CCNB2	GINS2	1847117	1844233	9606.ENSP00000288207	9606.ENSP00000253462	0	0	0	0	0.827	0.058	0	0.149	0.849
GINS2	CENPM	1844233	1842528	9606.ENSP00000253462	9606.ENSP00000215980	0	0	0	0	0.831	0	0	0.143	0.849
TOP2A	KIF23	1860923	1844781	9606.ENSP00000411532	9606.ENSP00000260363	0	0	0	0	0.798	0	0	0.283	0.849
PCNA	GMNN	1856984	1843236	9606.ENSP00000368438	9606.ENSP00000230056	0	0	0	0	0.756	0	0	0.406	0.849
PLK1	MCM3	1848135	1843226	9606.ENSP00000300093	9606.ENSP00000229854	0	0	0	0	0.517	0.36	0	0.55	0.849
CDCA8	GINS2	1849847	1844233	9606.ENSP00000316121	9606.ENSP00000253462	0	0	0	0	0.828	0	0	0.16	0.849
RACGAP1	NCAPG	1849236	1844063	9606.ENSP00000309871	9606.ENSP00000251496	0	0	0	0	0.828	0	0	0.161	0.849
DTL	MLF1IP	1854490	1846726	9606.ENSP00000355958	9606.ENSP00000281453	0	0	0	0	0.835	0	0	0.122	0.849
PRC1	HMMR	1858173	1858139	9606.ENSP00000377793	9606.ENSP00000377492	0	0	0	0	0.826	0	0	0.16	0.848
EXO1	CCNA2	1849472	1846354	9606.ENSP00000311873	9606.ENSP00000274026	0	0	0	0	0.802	0.168	0	0.149	0.848
KIF20A	TRIP13	1858244	1842297	9606.ENSP00000378356	9606.ENSP00000166345	0	0	0	0	0.812	0	0	0.223	0.848
ZWINT	RRM2	1856020	1854033	9606.ENSP00000363055	9606.ENSP00000353770	0	0	0	0	0.829	0	0	0.152	0.848
KIAA0101	DLGAP5	1848123	1843859	9606.ENSP00000300035	9606.ENSP00000247191	0	0	0	0	0.839	0	0	0.09	0.848
NEK2	CENPA	1854493	1851939	9606.ENSP00000355966	9606.ENSP00000336868	0	0	0	0	0.776	0	0	0.35	0.848
CENPA	ANLN	1851939	1845802	9606.ENSP00000336868	9606.ENSP00000265748	0	0	0	0	0.807	0	0	0.244	0.848
TTK	NCAPH	1855108	1843566	9606.ENSP00000358813	9606.ENSP00000240423	0	0	0	0	0.83	0	0	0.14	0.848
FOXM1	CDCA8	1852579	1849847	9606.ENSP00000342307	9606.ENSP00000316121	0	0	0	0	0.821	0	0	0.187	0.848
TTK	RAD51AP1	1855108	1843165	9606.ENSP00000358813	9606.ENSP00000228843	0	0	0	0	0.842	0	0	0.078	0.848
CCNF	MCM5	1858453	1842548	9606.ENSP00000380256	9606.ENSP00000216122	0	0	0	0	0.737	0.182	0	0.35	0.848
GINS2	CDC6	1844233	1842453	9606.ENSP00000253462	9606.ENSP00000209728	0	0	0	0	0.805	0	0	0.25	0.847
MCM6	CCNB1	1845487	1844435	9606.ENSP00000264156	9606.ENSP00000256442	0	0	0	0	0.674	0.284	0	0.4	0.847
PTTG1	OIP5	1852874	1842788	9606.ENSP00000344936	9606.ENSP00000220514	0	0	0	0	0.841	0	0	0.076	0.847
UBE2T	PTTG1	1854557	1852874	9606.ENSP00000356243	9606.ENSP00000344936	0	0	0	0	0.847	0	0	0	0.847
CDC25C	PLK4	1850370	1846179	9606.ENSP00000321656	9606.ENSP00000270861	0	0	0	0	0.53	0.112	0	0.664	0.847
SMC4	CDC6	1852454	1842453	9606.ENSP00000341382	9606.ENSP00000209728	0	0	0	0	0.43	0.693	0	0.195	0.847
MAD2L1	MCM6	1847745	1845487	9606.ENSP00000296509	9606.ENSP00000264156	0	0	0	0	0.802	0.098	0	0.212	0.847
CENPN	CEP55	1858091	1855493	9606.ENSP00000377007	9606.ENSP00000360540	0	0	0	0	0.798	0	0	0.277	0.847
AURKB	PLK4	1863844	1846179	9606.ENSP00000463999	9606.ENSP00000270861	0	0	0	0.838	0.76	0.336	0	0.503	0.847
PRC1	MCM2	1858173	1845676	9606.ENSP00000377793	9606.ENSP00000265056	0	0	0	0	0.82	0	0	0.184	0.847
HMMR	KIF2C	1858139	1855643	9606.ENSP00000377492	9606.ENSP00000361298	0	0	0	0	0.815	0	0	0.205	0.846
PCNA	CHAF1A	1856984	1848269	9606.ENSP00000368438	9606.ENSP00000301280	0	0	0	0	0.356	0.36	0	0.657	0.846
EXO1	PBK	1849472	1848348	9606.ENSP00000311873	9606.ENSP00000301905	0	0	0	0	0.814	0.13	0	0.12	0.846
ZWINT	DLGAP5	1856020	1843859	9606.ENSP00000363055	9606.ENSP00000247191	0	0	0	0	0.817	0	0	0.198	0.846
OAS1	OASL	1859322	1844517	9606.ENSP00000388001	9606.ENSP00000257570	0	0	0	0.857	0.827	0	0	0.759	0.846
CDC45	BUB1B	1860553	1847075	9606.ENSP00000405726	9606.ENSP00000287598	0	0	0	0	0.812	0	0	0.211	0.846
RRM2	PRIM1	1854033	1853600	9606.ENSP00000353770	9606.ENSP00000350491	0	0	0	0	0.803	0	0	0.244	0.845
CENPA	KIF23	1851939	1844781	9606.ENSP00000336868	9606.ENSP00000260363	0	0	0	0	0.727	0.24	0	0.316	0.845
MAD2L1	GINS2	1847745	1844233	9606.ENSP00000296509	9606.ENSP00000253462	0	0	0	0	0.827	0	0	0.141	0.845
PRC1	FOXM1	1858173	1852579	9606.ENSP00000377793	9606.ENSP00000342307	0	0	0	0	0.798	0.146	0	0.173	0.845
CHEK1	OIP5	1859362	1842788	9606.ENSP00000388648	9606.ENSP00000220514	0	0	0	0	0.845	0	0	0	0.845
FEN1	NCAPG	1848737	1844063	9606.ENSP00000305480	9606.ENSP00000251496	0	0	0	0	0.776	0.326	0	0.058	0.845
MCM3	RNASEH2A	1843226	1842842	9606.ENSP00000229854	9606.ENSP00000221486	0	0	0	0	0.833	0	0	0.114	0.845
DTL	CCNB1	1854490	1844435	9606.ENSP00000355958	9606.ENSP00000256442	0	0	0	0	0.816	0	0	0.19	0.845
KIF11	TRIP13	1844817	1842297	9606.ENSP00000260731	9606.ENSP00000166345	0	0	0	0	0.808	0	0	0.223	0.845
HJURP	CCNA2	1861060	1846354	9606.ENSP00000414109	9606.ENSP00000274026	0	0	0	0	0.818	0	0	0.187	0.845
CDC25C	BUB1	1850370	1848415	9606.ENSP00000321656	9606.ENSP00000302530	0	0	0	0	0.757	0	0	0.382	0.844
EXO1	DLGAP5	1849472	1843859	9606.ENSP00000311873	9606.ENSP00000247191	0	0	0	0	0.832	0	0	0.106	0.844
RACGAP1	TPX2	1849236	1848175	9606.ENSP00000309871	9606.ENSP00000300403	0	0	0	0	0.793	0	0	0.277	0.844
TOP2A	OIP5	1860923	1842788	9606.ENSP00000411532	9606.ENSP00000220514	0	0	0	0	0.834	0	0	0.103	0.844
PRC1	NEK2	1858173	1854493	9606.ENSP00000377793	9606.ENSP00000355966	0	0	0	0	0.802	0	0	0.242	0.844
HMMR	CDC20	1858139	1849070	9606.ENSP00000377492	9606.ENSP00000308450	0	0	0	0	0.808	0	0	0.215	0.843
PRIM1	MAD2L1	1853600	1847745	9606.ENSP00000350491	9606.ENSP00000296509	0	0	0	0	0.823	0	0	0.151	0.843
RRM2	ANLN	1854033	1845802	9606.ENSP00000353770	9606.ENSP00000265748	0	0	0	0	0.814	0	0	0.188	0.843
TYMS	MELK	1849803	1847923	9606.ENSP00000315644	9606.ENSP00000298048	0	0	0	0	0.827	0	0	0.127	0.843
MCM6	LIG1	1845487	1845325	9606.ENSP00000264156	9606.ENSP00000263274	0	0	0	0	0.703	0	0	0.493	0.843
NCAPG	RAD51AP1	1844063	1843165	9606.ENSP00000251496	9606.ENSP00000228843	0	0	0	0	0.822	0	0	0.15	0.843
ESPL1	NCAPH	1844556	1843566	9606.ENSP00000257934	9606.ENSP00000240423	0	0	0	0	0.743	0.042	0	0.411	0.842
CHEK1	CENPA	1859362	1851939	9606.ENSP00000388648	9606.ENSP00000336868	0	0	0	0	0.764	0.118	0	0.303	0.842
CCNF	PKMYT1	1858453	1845109	9606.ENSP00000380256	9606.ENSP00000262300	0	0	0	0	0.409	0.498	0	0.51	0.842
NDC80	OIP5	1844946	1842788	9606.ENSP00000261597	9606.ENSP00000220514	0	0	0	0	0.831	0	0	0.104	0.842
KIF11	ECT2	1844817	1843313	9606.ENSP00000260731	9606.ENSP00000232458	0	0	0	0	0.815	0	0	0.184	0.842
AURKA	TRIP13	1842628	1842297	9606.ENSP00000216911	9606.ENSP00000166345	0	0	0	0	0.814	0	0	0.187	0.842
CDK1	TK1	1858283	1848315	9606.ENSP00000378699	9606.ENSP00000301634	0	0	0	0	0.551	0.36	0	0.496	0.842
PLK1	MCM2	1848135	1845676	9606.ENSP00000300093	9606.ENSP00000265056	0	0	0	0	0.463	0.36	0	0.578	0.842
AURKB	MCM2	1863844	1845676	9606.ENSP00000463999	9606.ENSP00000265056	0	0	0	0	0.786	0	0	0.288	0.841
CDC45	TPX2	1860553	1848175	9606.ENSP00000405726	9606.ENSP00000300403	0	0	0	0	0.82	0	0	0.151	0.841
TPX2	MAD2L1	1848175	1847745	9606.ENSP00000300403	9606.ENSP00000296509	0	0	0	0	0.788	0	0	0.281	0.841
CDKN3	CDK4	1851839	1844551	9606.ENSP00000335357	9606.ENSP00000257904	0	0	0	0	0.095	0.17	0	0.805	0.841
ACTA1	TMOD1	1854428	1844687	9606.ENSP00000355645	9606.ENSP00000259365	0	0	0	0	0.065	0.826	0	0.101	0.841
RRM2	GINS2	1854033	1844233	9606.ENSP00000353770	9606.ENSP00000253462	0	0	0	0	0.817	0	0	0.169	0.841
NEK2	PBK	1854493	1848348	9606.ENSP00000355966	9606.ENSP00000301905	0	0	0	0.639	0.827	0	0	0.248	0.841
CDC45	PTTG1	1860553	1852874	9606.ENSP00000405726	9606.ENSP00000344936	0	0	0	0	0.813	0	0	0.184	0.841
ZWINT	MELK	1856020	1847923	9606.ENSP00000363055	9606.ENSP00000298048	0	0	0	0	0.834	0	0	0.082	0.841
FANCI	CCNB1	1849356	1844435	9606.ENSP00000310842	9606.ENSP00000256442	0	0	0	0	0.82	0	0	0.143	0.84
TYMS	CDC20	1849803	1849070	9606.ENSP00000315644	9606.ENSP00000308450	0	0	0	0	0.8	0	0	0.233	0.84
KIF4A	CDKN3	1856112	1851839	9606.ENSP00000363524	9606.ENSP00000335357	0	0	0	0	0.826	0.061	0	0.099	0.84
BUB1	CDT1	1848415	1848231	9606.ENSP00000302530	9606.ENSP00000301019	0	0	0	0	0.731	0.305	0	0.211	0.84
TOP2A	TOP3B	1860923	1853482	9606.ENSP00000411532	9606.ENSP00000349705	0.057	0	0	0	0.208	0.096	0	0.791	0.84
TYMS	MAD2L1	1849803	1847745	9606.ENSP00000315644	9606.ENSP00000296509	0	0	0	0	0.812	0	0	0.185	0.84
KIF4A	ANLN	1856112	1845802	9606.ENSP00000363524	9606.ENSP00000265748	0	0	0	0	0.726	0	0	0.439	0.84
NDC80	MCM3	1844946	1843226	9606.ENSP00000261597	9606.ENSP00000229854	0	0	0	0	0.834	0.07	0	0.045	0.84
CDC45	CENPA	1860553	1851939	9606.ENSP00000405726	9606.ENSP00000336868	0	0	0	0	0.782	0.054	0	0.282	0.839
ZWINT	LMNB1	1856020	1844893	9606.ENSP00000363055	9606.ENSP00000261366	0	0	0	0	0.307	0.774	0	0.053	0.839
[truncated: 4,606 more rows]
